# Supplementary material
Source: ML conference proceedings conference paper supplement (https://openreview.net/forum?id=K3n5jPkrU6)
Supplement: supplementary_material [file attachment]

## Sheet: Sheet1
category	name	task_prompt
Action Game	Action Shooter	A fast-paced, first-person shooter game
Action Game	Adrenaline Rush	Adrenaline Rush is an action game software that provides intense combat scenarios where players fight against waves of enemies. It offers thrilling and adrenaline-pumping gameplay with a variety of weapons and special abilities.
Action Game	Arcane Arena	Arcane Arena is a fast-paced action game where players control magical beings in a battle royale-style setting. Each player can choose one of several unique characters with different abilities and playstyles. The objective is to be the last one standing by eliminating opponents and staying within a shrinking arena. The game features dynamic spellcasting mechanics, intense battles, and strategic p…
Action Game	Arena Clash	Arena Clash is an action game where players engage in intense battles against each other in various arenas. Players can choose from a range of unique characters, each with their own abilities and playstyles. The objective is to defeat opponents using a combination of skill, strategy, and teamwork. The game features customizable characters, dynamic environments, and different game modes such as te…
Action Game	Battle Squad	Battle Squad is an action game that allows players to assemble their own team of skilled warriors and engage in thrilling battles against enemy factions. The game offers various game modes such as story campaign, multiplayer battles, and daily challenges for endless entertainment.
Action Game	Battlefield Showdown Action	Action game that allows players to engage in battles against each other in an immersive and fast-paced environment. Features a wide range of weapons, customizable characters, and various game modes like team deathmatch and capture the flag. Players can strategize, coordinate, and showcase their combat skills to dominate the battlefield.
Action Game	Destruction Dash	An action game where players play as a demolition expert tasked with destroying buildings within a time limit.
Action Game	Dragon Fury	Dragon Fury is an action game where players take on the role of a powerful dragon soaring through ancient landscapes and battling mythical creatures. Players will have the ability to breathe fire, unleash devastating attacks, and defend themselves with scales and claws. The objective is to defeat bosses and complete quests to restore balance to the dragon realm. The game features stunning visuals…
Action Game	Dungeon Conqueror	Dungeon Conqueror is an action game where players embark on a quest to explore treacherous dungeons, defeat powerful monsters, and uncover hidden treasures. Armed with a variety of weapons and gear, players must navigate through labyrinthine levels, solving puzzles and battling enemies. The game offers challenging boss fights, character progression, and immersive gameplay with stunning visuals an…
Action Game	Dungeon Hero	Dungeon Hero is a 2D action game where players take on the role of a brave hero exploring dark and treacherous dungeons. Armed with a sword and shield, the player must navigate through maze-like levels, defeat enemies, and collect valuable treasures. The game features challenging boss battles, hidden paths, and various power-ups that enhance the hero
Action Game	Enemy Eliminator	An action game where the player must eliminate a wave of incoming enemy forces using their shooting skills.
Action Game	Galactic Defender	Galactic Defender is an action game where players take on the role of a space pilot defending the galaxy against alien invaders. Players will navigate through different planetary systems, engaging in intense space battles and using advanced weaponry to defeat enemy ships. The game features immersive graphics, customizable spaceships, and strategic gameplay.
Action Game	Game Frenzy	An action game software that allows players to engage in fast-paced, intense battles against virtual opponents. Players have a range of weapons and abilities to defeat enemy AI characters. Customize characters, unlock new weapons and abilities as you progress.
Action Game	Gunner Strike	An action game where players navigate levels, defeat enemies using various weapons, upgrade their abilities, and face intense boss battles in their quest to achieve the highest score possible.
Action Game	Laser Defender	An action game where players control a spaceship equipped with powerful lasers and shields. The objective is to navigate through various levels, shooting down enemy spaceships and avoiding obstacles. Players can collect power-ups to upgrade their lasers and shields, and strategically use their shields to deflect enemy attacks. The game features immersive graphics, smooth controls, and challenging…
Action Game	Martial Arts Fury	In Martial Arts Fury, players will engage in intense hand-to-hand combat as skilled martial artists. Use agility, strategy, and timing to defeat opponents. Choose from various martial arts styles with unique moves and abilities. Experience stunning visuals and challenging gameplay.
Action Game	Monster Hunter Challenge	An action game where players become hunters in a fantasy world, fighting dangerous monsters using various weapons and skills. Explore different environments, uncover treasures, and unlock new abilities. Offers single-player and multiplayer modes.
Action Game	Monster Mayhem	Monster Mayhem is an action game where players take on the role of a fearless monster hunter tasked with eliminating hordes of terrifying creatures.
Action Game	Mystic Maze	Mystic Maze is a 3D action game where players navigate through a maze filled with mystical creatures, obstacles, and puzzles. Players can choose from different characters with unique abilities and must use their skills to overcome challenges and reach the end of the maze. Along the way, they can collect power-ups and weapons to aid them in their quest. With immersive graphics and engaging gamepla…
Action Game	Ninja Assassin	Ninja Assassin is an action game where players take on the role of a stealthy ninja on a mission to eliminate targets in various environments. Players must carefully navigate through complex levels, using their agility, combat skills, and stealth techniques to silently take down enemies and complete their objectives. The game features immersive graphics, challenging gameplay, and a wide range of …
Action Game	Ninja Duel	Ninja Duel is an action game where players take on the role of rival ninjas in intense one-on-one battles. Each ninja has unique abilities and weapons, and players must utilize their skills to outmaneuver and defeat their opponent. The game features smooth controls, dynamic environments, and a variety of special moves and combos to master.
Action Game	Pixel Warrior	Pixel Warrior is a fast-paced action game where players take on the role of a pixelated warrior armed with various weapons. The objective is to defeat waves of enemies in different levels and earn points. Players can unlock new weapons and upgrades as they progress in the game. The game features smooth controls, visually appealing pixel art graphics, and intense gameplay.
Action Game	Shadow Strike	Shadow Strike is an action game where players take on the role of a stealthy assassin infiltrating enemy bases. Players must complete missions by silently eliminating targets, avoiding detection, and overcoming security measures. The game features a variety of levels with increasing difficulty, challenging players to strategize their approach and make precise strikes. With realistic stealth mecha…
Action Game	Space Defender	Space Defender is an action game where players control a spaceship to defend the Earth from alien invaders. Use your skills to shoot down enemy ships and collect power-ups to enhance your weapons and increase your health. Survive for as long as possible and aim for a high score!
Action Game	Street Brawler	A 2D side-scrolling action game where players control a street fighter character and engage in intense hand-to-hand combat against various opponents. Players can perform combo attacks, block enemy strikes, and unleash special moves to defeat their adversaries. The game will have multiple levels with increasing difficulty, and players can earn points and achievements by successfully defeating oppo…
Action Game	Superhero Showdown	Superhero Showdown is an action game where players can choose from a variety of iconic superheroes and engage in epic battles against powerful villains. Players will unleash their superpowers and perform combo attacks to defeat enemies and complete missions. The game features stunning graphics, immersive gameplay, and a dynamic open-world environment for players to explore and protect.
Action Game	Ultra Blaster	Ultra Blaster is an action game where players take on the role of a futuristic space pilot. Armed with a high-powered blaster, players navigate through various levels filled with enemy spaceships and obstacles. The objective is to destroy as many enemy ships as possible while avoiding collisions and collecting power-ups for upgrades. With its stunning graphics, intense gameplay, and challenging l…
Action Game	Urban Rampage	Urban Rampage is an action game where players take on the role of a vigilante in a crime-ridden city. Players must navigate through the city streets, taking down criminals and corrupt officials in their quest for justice. The game features hand-to-hand combat, weapon upgrades, and stealth mechanics.
Action Game	Virtual Ninja Warrior	Virtual Ninja Warrior is an action game where players take on the role of a skilled ninja tasked with completing challenging missions. Players will navigate through different levels, using stealth, agility, and combat skills to overcome obstacles, defeat enemies, and accomplish their objectives. The game features immersive graphics, smooth controls, and a variety of weapons and abilities to enhan…
Action Game	Zombie Apocalypse Runner	In this action game, players are tasked with navigating through a post-apocalyptic city infested with zombies. The objective is to survive for as long as possible while avoiding or eliminating the undead. Players can choose from different characters, each with unique abilities like parkour skills or weapon expertise. They must use their agility and quick reflexes to evade obstacles, collect suppl…
Board Game	Board Game Companion	A software application that serves as a digital companion to traditional board games, offering features such as turn tracking, scorekeeping, rule references, and interactive player aids. It also includes a customizable timer for games that require it.
Board Game	Strategic Moves	Strategic Moves is a board game software application that allows players to engage in strategic battles on a virtual game board. Players can choose from a variety of armies and take turns making moves to capture territories and defeat opponents
Board Game	Dice Roll Simulator	A simple software application that simulates the roll of a dice. It allows users to select the number of dice, choose the type of dice, and displays the result of each roll. The application provides a graphical representation of the dice and allows users to roll the dice by clicking a button.
Board Game	Tile Placer	A board game software that allows players to strategically place tiles on a game board to create patterns and earn points. Each player takes turns selecting and placing tiles, aiming to create the most valuable combinations. The software provides a variety of colorful and unique tiles for players to choose from, and it calculates the point values of the different combinations based on predefined …
Board Game	Board Game Score Tracker	A software application that allows players to easily track and manage scores for various board games. It provides a user-friendly interface where players can input their scores and view a leaderboard. The software also supports multiple games and allows players to customize the scoring rules for each game.
Board Game	Board Game Rule Generator	A software application that generates random board game rules for players to follow. It provides a variety of rule categories such as movement, scoring, special abilities, and win conditions. Players can customize the number of rules generated and the difficulty level. The software also includes a rule reference and allows players to save and share their favorite rule sets.
Board Game	Board Game Timer Assistant	A software application that serves as a timer assistant for board games, providing customizable timers for different game phases or turns. It also includes features such as sound alerts, pause and resume functionality, and an optional countdown display.
Board Game	Board Game Challenge	A software application that provides a collection of challenging board game scenarios for players to solve. Each scenario presents a specific board setup and a set of missions or objectives that players must accomplish using the given resources and rules. Players can choose from different difficulty levels and track their progress as they complete each challenge.
Board Game	Board Game Strategy Analyzer	A software application that analyzes board game strategies based on historical game data. It provides statistical insights and recommendations to players, helping them improve their gameplay and decision-making skills. The software evaluates different strategies, tracks their success rates, and highlights key patterns and trends. It also offers interactive visualizations and comparison tools to h…
Board Game	Board Game Solver	A software application that helps players solve complex board game scenarios by providing optimal moves and strategies. It analyzes the current state of the game board and takes into account various factors such as player positions, resources, and available actions. The solver algorithm calculates the best possible moves for each player, considering both short-term gains and long-term strategies.…
Board Game	Board Game Event Planner	A software application that helps board game enthusiasts plan and organize board game events. It includes features such as event scheduling, attendee management, game selection, and location tracking. Users can create events, invite friends, and easily manage game sessions. The software also provides recommendations for suitable games based on the number of players, duration, and complexity.
Board Game	Board Game Art Designer	A software application that allows users to design and customize the artwork and graphics for their board games. Users can create and edit game boards, cards, tokens, and other visual elements using a user-friendly interface. It provides a variety of templates, images, and editing tools, allowing users to unleash their creativity and personalize their games.
Board Game	Board Game Dice Tower	Simulation software application that provides a virtual representation of a dice tower for board games. Allows players to roll dice by dropping them into the tower, providing realistic results. Includes customizable options for the appearance and sound effects of the dice tower.
Board Game	Board Game Recommendation Assistant	A software application that provides personalized recommendations for board games based on user preferences. It takes into account factors such as number of players, game duration, complexity, and game themes. Users can input their preferences and the software will generate a list of recommended board games that match their criteria. It also includes a search feature where users can explore and d…
Board Game	Board Game Dice Tower Simulator	Accurately simulate a dice tower for board games with customizable appearance and sound effects. Enhance the board game experience by adding a touch of realism.
Board Game	Board Game Collaborator	A software application that allows players to collaborate and strategize together in board games. It provides a shared digital game board where players can discuss and plan their moves, share resources and information, and coordinate their strategies. The software includes features such as a chat function, move tracking, and a shared notepad for taking notes. It is designed to enhance the coopera…
Board Game	Board Game Puzzle Solver	A software application that helps players solve complex puzzles in board games by providing optimal moves and strategies. It analyzes the current state of the puzzle and takes into account various factors such as grid positions, available pieces, and desired end states. The solver algorithm calculates the best possible moves for each player, considering both short-term gains and long-term strateg…
Board Game	Board Game Challenge Creator	A software application that allows players to create and share their own challenging board game scenarios. Players can select from a variety of board setups, define missions and objectives, set resource limitations, and establish victory conditions. The software provides a user-friendly interface where players can customize every aspect of their challenges, from the number of players to the diffi…
Board Game	Board Game Score Comparison	A software application that allows players to compare their scores in different board games. It provides a user-friendly interface where players can input their scores for multiple games and view a side-by-side comparison of their performance.
Board Game	Board Game Score Predictor	A software application that uses machine learning algorithms to predict the scores of players in board games based on their previous performance and gameplay patterns. It takes into account factors such as game type, number of players, and individual player strategies to generate accurate score predictions.
Board Game	Board Game Turn Timer	The Board Game Turn Timer is a software application that provides a customizable timer for turn-based board games. It allows players to set a specific time limit for each turn and displays a countdown timer during gameplay. When the time is up, the software automatically moves to the next player
Board Game	Board Game Challenge Timer	A software application that provides a customizable timer for board game challenges. Players can set a specific time limit for each challenge and the software displays a countdown timer during gameplay. When the time is up, the software automatically moves to the next challenge.
Board Game	Board Game Strategy Tracker	A software application that allows players to track and analyze their strategies in board games. Players input their moves, decisions, and game states, and the software generates visual representations of gameplay to highlight key strategies and decision points. It helps players review and compare strategies, identify areas for improvement, and learn from successful plays.
Board Game	Board Game Strategy Assistant	A software application that provides strategic tips and advice for players during board games. It analyzes the current game state and offers suggestions on optimal moves, potential strategies, and possible counter-moves. The assistant takes into account factors such as player positions, available resources, and game objectives to provide tailored recommendations. It also includes interactive visu…
Board Game	Board Game Turn Order Randomizer	Board Game Turn Order Randomizer is a software application that ensures fair gameplay by randomizing the turn order for board games. Players input their names and the number of players, and the software generates a random turn order. This eliminates any bias or advantage associated with a predetermined turn order, creating a balanced gaming experience. The simple implementation and lack of comple…
Board Game	Board Game Puzzle Generator	A software application that generates random board game puzzles for players to solve. It provides various puzzle categories such as logic puzzles, pattern recognition, and spatial puzzles. Each puzzle is unique and challenging, with different levels of difficulty. The software includes a timer and scoring system to track the player
Board Game	Board Game Scenario Creator	A software application that allows players to create custom scenarios for board games. Players can define the board setup, set objectives and missions, and choose victory conditions. The software provides a user-friendly interface for designing custom scenarios, including options for adding obstacles and bonuses. Players can save and share their created scenarios with others.
Board Game	Board Game Card Tracker	A software application that helps players keep track of their card collections for various board games. It allows users to input the name, quantity, and condition of each card in their collection. The software also provides a search function where users can find specific cards and check their availability. Additionally, it offers organizational features such as creating folders and tags to catego…
Board Game	Board Game Strategy Coach	The Board Game Strategy Coach is a software application that provides strategic advice and coaching for players during board games. It analyzes the current game state, evaluates the available options, and offers recommendations on optimal moves and strategies. The coach takes into account factors such as player positions, resource allocation, and game objectives to provide personalized guidance. …
Board Game	Board Game Word Finder	A software application that helps players find words within letters in board games such as Scrabble or Boggle. Players can input the available letters, and the software generates a list of valid words that can be formed from those letters.
Budgeting	ExpenseTracker	Track your expenses easily
Budgeting	BudgetPlanner	BudgetPlanner is a software application that helps individuals manage their personal finances effectively...
Budgeting	Cash Flow Manager	CashFlowManager is a software application that helps individuals track and manage their cash flow efficiently.
Budgeting	Expense Optimizer	Optimize your expenses for maximum savings
Budgeting	BudgetTracker	BudgetTracker is a user-friendly software application that helps individuals effectively manage their budgets...
Budgeting	BudgetAdvisor	BudgetAdvisor is a software application that provides personalized financial advice and guidance to help individuals effectively manage their budgets and achieve their financial goals.
Budgeting	BudgetMonitor	BudgetMonitor is a software application that helps individuals track and monitor their budget effectively. It provides users with a clear overview of their income and expenses, allowing them to identify spending patterns and make informed financial decisions. With customizable categories and visual representations of budget breakdowns, BudgetMonitor simplifies the process of budget management. Us…
Budgeting	BudgetSaver	BudgetSaver is a software application that helps individuals save money by analyzing their expenses and providing personalized recommendations for reducing spending and increasing savings. It tracks and categorizes expenses, identifies areas of overspending, and suggests cost-saving strategies. Users can set savings goals and track their progress over time. With BudgetSaver, individuals can make …
Budgeting	Smart Budget	SmartBudget is a budgeting software application that helps individuals effectively manage their finances by providing intelligent spending recommendations.
Budgeting	BudgetTrackerPro	BudgetTrackerPro is a budgeting software application that focuses on helping individuals effectively track and manage their budgets. It provides users with a user-friendly interface to easily input and categorize their income and expenses. Additionally, it offers features such as customizable budget goals, reminders for upcoming bills and payments, and clear visual representations of budget break…
Budgeting	BudgetOptimizer	BudgetOptimizer is a budgeting software application that helps individuals optimize their finances by analyzing their income and expenses and providing personalized recommendations for improving their financial management. It offers features such as income tracking, expense categorization, budget goal setting, and spending analysis. Users can input their monthly income and expenses, and BudgetOpt…
Budgeting	BudgetPlannerLite	BudgetPlannerLite is a simplified budgeting software application that helps individuals track and manage their budgets effectively. It provides a user-friendly interface for inputting income and expenses and offers basic budgeting features such as goal setting and visual representations of budget breakdowns.
Budgeting	BudgetMaster	BudgetMaster is a budgeting software application that helps individuals effectively manage their finances by providing comprehensive budgeting features. It allows users to input their income and expenses, categorize them, and set budget goals. The software provides visual representations of budget breakdowns and generates reports to track spending patterns. With BudgetMaster, users can make infor…
Budgeting	BudgetOptimizerLite	BudgetOptimizerLite is a simplified budgeting software application that helps individuals track and manage their budgets effectively. It provides users with a user-friendly interface to input their income and expenses and offers basic budgeting features such as goal setting and visual representations of budget breakdowns. This software focuses on simplicity and ease of use, making it ideal for in…
Budgeting	ExpensePlanner	ExpensePlanner is a user-friendly software application that allows individuals to plan and track their expenses efficiently. It provides a simple and intuitive interface for users to input and categorize their expenses. Users can set budget goals, track their spending, and receive notifications when they exceed predefined limits. ExpensePlanner also offers visual representations of budget breakdo…
Budgeting	BudgetTrackerLite	BudgetTrackerLite is a simplified budgeting software application that helps individuals track and manage their budgets effectively. It provides a user-friendly interface for inputting income and expenses and offers basic budgeting features such as goal setting and visual representations of budget breakdowns.
Budgeting	SavingsTracker	SavingsTracker is a budgeting software application that helps individuals effectively track and manage their savings goals. It provides an intuitive interface for users to input their income and expenses, categorize them, and set savings targets. The software offers visual representations of savings progress and generates reports to track savings habits. With SavingsTracker, users can make inform…
Budgeting	BudgetOptimizerLite Plus	BudgetOptimizerLite Plus is a simplified budgeting software application that helps individuals effectively track and manage their budgets. It provides users with a user-friendly interface to input their income and expenses and offers basic budgeting features such as goal setting and visual representations of budget breakdowns. Additionally, it includes a savings tracker that allows users to set s…
Budgeting	BudgetSaver Lite	BudgetSaver Lite is a simplified budgeting software application that helps individuals track and manage their budgets effectively. It provides a user-friendly interface for inputting income and expenses and offers basic budgeting features such as goal setting and visual representations of budget breakdowns.
Budgeting	SavingsPlanner	SavingsPlanner is a budgeting software application that focuses on helping individuals effectively plan and track their savings goals. It provides a user-friendly interface for users to input their income and expenses, categorize them, and set savings targets. The software offers visual representations of savings progress and generates reports to track savings habits. With SavingsPlanner, individ…
Budgeting	BudgetPro	BudgetPro is a budgeting software application that helps individuals effectively manage their finances. It allows users to input their income and expenses, set budget goals, and track their spending patterns. With visual representations of budget breakdowns and personalized recommendations, BudgetPro enables users to make informed financial decisions and achieve their financial goals.
Budgeting	BudgetPlannerLite Plus	BudgetPlannerLite Plus is a simplified budgeting software application that helps individuals track and manage their budgets effectively. It provides users with a user-friendly interface to input their income and expenses and offers basic budgeting features such as goal setting and visual representations of budget breakdowns. Additionally, it includes a savings tracker that allows users to set sav…
Budgeting	BudgetManagerLite	BudgetManagerLite is a simplified budgeting software application that helps individuals track and manage their budgets effectively.
Budgeting	BudgetOptimizerPlus	BudgetOptimizerPlus is a budgeting software application that goes beyond the basic functionality of tracking and managing budgets. It offers advanced features to help individuals optimize their financial management and achieve their long-term financial goals. It provides users with personalized recommendations based on their spending patterns and financial habits. BudgetOptimizerPlus also include…
Budgeting	BudgetOptimizerLiteEZ	BudgetOptimizerLiteEZ is a simplified budgeting software application that helps individuals track and manage their budgets effectively. It provides a user-friendly interface for inputting income and expenses and offers basic budgeting features such as goal setting and visual representations of budget breakdowns.
Budgeting	BudgetEnforcer	BudgetEnforcer is a budgeting software application that helps individuals stick to their budget and achieve their financial goals through gamification. It tracks users
Budgeting	BudgetTrackerLiteEZ	BudgetTrackerLiteEZ is a simplified budgeting software application that helps individuals track and manage their budgets effectively. It provides a user-friendly interface for inputting income and expenses and offers basic budgeting features such as goal setting and visual representations of budget breakdowns.
Budgeting	BudgetPlannerLiteEZ Save	A simplified budgeting software application that helps individuals track and manage their budgets effectively, with a focus on saving money. It provides a user-friendly interface for inputting income and expenses, offers basic budgeting features such as goal setting and visual representations of budget breakdowns, and includes features to track and monitor savings goals.
Budgeting	ExpenseAnalyzer	ExpenseAnalyzer is a budgeting software application that helps individuals analyze their expenses and identify areas where they can reduce spending and save money. It provides users with a user-friendly interface to input their income and expenses, categorize them, and generate detailed reports and charts to visualize spending patterns. With ExpenseAnalyzer, individuals can gain insights into the…
Budgeting	BudgetAssistant	BudgetAssistant is a budgeting software application that helps individuals effectively manage their finances by providing personalized budgeting recommendations based on their spending patterns and financial goals. It allows users to input their income and expenses, categorize them, and set budget goals. The software analyzes the data to identify areas of overspending and provides suggestions for…
Business	Business Analytics	Business Analytics is a software application that provides essential data analysis and visualization tools to help businesses make informed decisions...
Business	Inventory Tracker	An inventory tracker software that helps businesses keep track of their inventory levels, manage stock orders, and generate reports.
Business	TeamTask	TeamTask is a business software application that facilitates task management and collaboration within teams. It allows team members to create tasks, assign them to specific individuals, set deadlines, and track progress. The application also provides a centralized dashboard where team members can view their assigned tasks, communicate with each other, and update the status of tasks. In addition, …
Business	Customer Feedback Tracker	Customer Feedback Tracker is a business software application that allows businesses to collect and analyze customer feedback. The software provides a user-friendly interface for businesses to create and manage feedback forms, distribute them to customers via email or social media platforms, and collect responses. It also offers data visualization tools to analyze feedback data, identify trends an…
Business	Support Ticket System	A support ticket system is a business software application that allows businesses to efficiently manage and resolve customer support tickets. It provides a user-friendly interface where support agents can create and track tickets, assign them to specific agents, set priority levels, and communicate with customers. The system also offers features like automated ticket escalation, ticket status tra…
Business	Meeting Scheduler	Meeting Scheduler is a business software application that streamlines the process of scheduling and managing meetings for organizations...
Business	Business Expense Tracker	Business Expense Tracker is a software application that helps businesses track and manage their expenses. It provides features for recording expenses, categorizing them, setting budget limits, generating expense reports, and analyzing expense trends. The application also allows users to upload and store receipts for future reference.
Business	Project Tracker	Project Tracker is a business software application that helps businesses track and manage their projects. It provides features for creating and assigning tasks, setting deadlines, tracking progress, and generating reports. The application also allows team members to collaborate and communicate with each other, making it easier to coordinate and complete projects efficiently.
Business	Employee Performance Tracker	Employee Performance Tracker is a business software application that allows businesses to track and evaluate the performance of their employees. It provides features for setting performance goals, conducting performance evaluations, and generating performance reports.
Business	Customer Complaint Management System	The Customer Complaint Management System is a software application that allows businesses to efficiently manage and resolve customer complaints. It provides a user-friendly interface for customers to submit their complaints, track the progress, and communicate with the support team. The system enables support agents to receive and assign complaints to specific agents, prioritize them based on sev…
Business	Sales Performance Analyzer	Sales Performance Analyzer is a business software application that provides comprehensive data analysis and visualization tools to help businesses analyze and improve their sales performance. The software allows businesses to track sales data, identify trends and patterns, and generate actionable insights to optimize sales strategies and boost revenue.
Business	Financial Document Manager	Financial Document Manager is a business software application that helps businesses manage and organize their financial documents. It provides features for scanning and uploading documents, categorizing and labeling them, setting document expiration dates, and generating document reports. The application also offers features for secure storage and retrieval of documents, ensuring easy access and …
Business	Expense Budget Planner	The Expense Budget Planner is a software application that enables businesses to track, categorize, and analyze their expenses against predefined budgets. It provides features for recording expenses, assigning categories, setting budget limits, generating reports, and visualizing expense trends.
Business	Business Survey Tool	Business Survey Tool is a software application that enables businesses to create and distribute surveys to collect feedback and insights from their customers and employees. The tool provides a user-friendly interface for businesses to design customizable surveys with various question types and response options. It also offers features for managing survey distribution, tracking response rates, and…
Business	Customer Satisfaction Index Tracker	The Customer Satisfaction Index Tracker is a business software application that helps businesses measure and track their customer satisfaction levels...
Business	Sales Pipeline Tracker	Sales Pipeline Tracker is a business software application that helps businesses manage and track their sales pipeline. It provides features for capturing and organizing leads and prospects, tracking their progress through the sales process, and generating reports to analyze pipeline metrics. The application also offers functionalities like setting reminders for follow-ups, assigning leads to sale…
Business	Sales Performance Comparison	Sales Performance Comparison is a business software application that allows businesses to compare their sales performance against industry benchmarks. It provides features for businesses to track their sales data, input industry average data, and generate reports that visually compare their sales performance metrics to industry standards.
Business	Business Workflow Automation	Business Workflow Automation is a software application that helps businesses automate and streamline their internal workflows. It allows users to create and manage workflow templates, define the sequence of tasks, set deadlines and assign responsibilities. The application also facilitates task tracking and progress monitoring, ensuring that the workflow is executed efficiently. Additionally, it p…
Business	Productivity Enhancer	The Productivity Enhancer is a business software application that helps businesses improve efficiency and productivity within their organizations. It provides features such as task management, time tracking, and collaboration tools to streamline workflows and optimize work processes.
Business	Sales Territory Manager	Sales Territory Manager is a business software application that helps businesses organize and manage their sales territories. It provides features for defining and assigning territories to sales representatives, tracking territory performance metrics, and generating reports for analysis and optimization.
Business	Customer Acquisition Tracker	Customer Acquisition Tracker is a business software application that helps businesses track and analyze their customer acquisition efforts. It provides features for recording and categorizing customer acquisition channels, tracking the number of acquired customers through each channel, and generating reports to analyze the effectiveness of different acquisition strategies.
Business	Vendor Management System	The Vendor Management System is a business software application that allows businesses to efficiently manage their vendor relationships. It provides features for creating and maintaining a database of vendors, tracking vendor performance metrics, and generating reports for analysis and decision-making.
Business	Employee Time Tracker	Employee Time Tracker is a software application that allows businesses to track and manage employee working hours and attendance. It provides features for employees to log their working hours, record time off, and request leave. The application also offers functionalities for managers to approve and manage time off requests, monitor attendance and punctuality, and generate time and attendance rep…
Business	Product Feedback Analyzer	Product Feedback Analyzer is a business software application that helps businesses analyze and gain insights from customer feedback on their products. The software allows businesses to collect feedback from various sources such as surveys, online reviews, and social media comments. It provides features for categorizing feedback, identifying sentiment, and generating reports to analyze trends and …
Business	Customer Complaint Resolution Tracker	Customer Complaint Resolution Tracker is a business software application that helps businesses efficiently manage and resolve customer complaints. It provides a user-friendly interface for customers to submit their complaints, track the progress, and communicate with the support team. The software enables support agents to receive and assign complaints to specific agents, prioritize them based on…
Business	Business Sales Performance Tracker	Business Sales Performance Tracker is a software application that helps businesses track and analyze their sales performance. It provides features for inputting sales data, generating reports, and visualizing sales performance metrics. The application also allows businesses to set sales goals and compare actual performance against targets.
Business	Lead Generation Tracker	The Lead Generation Tracker is a business software application that helps businesses track and manage their lead generation efforts. It provides features for recording and categorizing leads, tracking their progress through the sales funnel, and generating reports to analyze the effectiveness of lead generation strategies.
Business	Profit Margin Analyzer	Profit Margin Analyzer is a business software application that enables businesses to analyze and optimize their profit margins. The software allows users to input sales revenue and cost data, and then calculates the profit margins for different products or services. It provides detailed reports and visualizations to identify areas where profit margins can be improved and suggests cost-saving meas…
Business	Sales Territory Planner	Sales Territory Planner is a business software application that helps businesses strategically plan and manage their sales territories. It provides features for businesses to define and assign territories based on geographical regions, customer segments, or product lines. The application also allows businesses to track territory performance metrics such as sales revenue, customer acquisition, and…
Business	Business Task Scheduler	Business Task Scheduler is a software application that helps businesses manage and schedule their tasks and assignments. It provides features for creating tasks, assigning them to team members, setting deadlines, and tracking progress. The application also offers functionalities like task prioritization, notifications, and calendar integration to ensure efficient task management and timely comple…
Culture	Culture Exchange	A software platform connecting individuals from different cultures worldwide, fostering understanding and promoting cultural exchange.
Culture	Culture Explorer	Provide a curated collection of literature, music, visual arts, and films from various cultures to facilitate personalized cultural exploration.
Culture	Culture Facts	Culture Facts is a software application that provides users with interesting and educational facts about different cultures from around the world.
Culture	CultureConnect	CultureConnect is a software that provides a virtual platform for users to explore and learn about various cultures from around the world...
Culture	Cultural Storyteller	An application that allows users to explore and discover stories from various cultures, promoting cultural appreciation and diversity through the power of storytelling.
Culture	Culture Appreciation	The Culture Appreciation app offers users a daily dose of knowledge about different cultures worldwide. Explore detailed descriptions, fun facts, historical background, and traditional practices of various cultures. Dive into specific countries or regions of interest. Test and enhance your cultural understanding with quizzes and interactive games. The app aims to educate, promote cultural awarene…
Culture	Culture Insights	Culture Insights is a software application that provides users with in-depth insights into the customs, traditions, and social norms of different cultures around the world.
Culture	Cultural Calendar	The Cultural Calendar is a software application that provides users with a curated collection of cultural events, festivals, and celebrations from around the world. It allows users to explore and discover various cultural happenings, including religious festivals, national holidays, and traditional events. Users can view event details, learn about the significance and history behind the celebrati…
Culture	Culture Connections	A software application that provides a platform to connect with people from different cultures worldwide, fostering cultural understanding and meaningful connections.
Culture	Culture Explorer Plus	Culture Explorer Plus is a software application that offers an immersive experience of different cultures worldwide. Users can virtually visit iconic landmarks, historical sites, and famous museums through interactive 3D tours. Additionally, they can engage in virtual cultural workshops and events, learning about the history and significance of each location.
Culture	Culture Connections	Culture Connections is a software application that aims to bridge the gap between people from different cultures worldwide by facilitating meaningful connections and fostering cultural understanding...
Culture	Culture Trivia Challenge	A software application that offers users a fun and interactive way to test their knowledge of different cultures through trivia questions and quizzes.
Culture	Culture Journeys	Culture Journeys is a software application that offers users a virtual platform to embark on immersive cultural journeys from around the world. Users can explore different countries and regions, discovering their unique customs, traditions, food, music, and more. The application provides interactive experiences such as virtual tours of landmarks, language learning modules, traditional recipe tuto…
Culture	Culture Connections Plus	Culture Connections Plus is a software application that brings together individuals from different cultures through immersive virtual experiences. Users can participate in virtual cultural workshops, engage in language exchange programs, and learn about diverse cultures through interactive 3D tours of landmarks and museums. The app also provides a platform for users to connect with people from di…
Culture	Culture Video Chat	Culture Video Chat enables individuals from different cultures to connect and have real-time conversations through video chat. The platform provides language translation features to overcome barriers and encourages sharing of cultural experiences.
Culture	Culture Recipe	Culture Recipe is a software application that allows users to explore and learn about traditional recipes from different cultures around the world. Users can discover a wide range of dishes, including appetizers, main courses, desserts, and beverages, from various countries and regions. The application provides step-by-step instructions, ingredient lists, and cooking tips to help users recreate a…
Culture	Cultural Crafts	Cultural Crafts is a software application that allows users to explore and learn about traditional crafts from different cultures around the world. Users can discover a wide range of crafts, such as pottery, weaving, origami, beadwork, and wood carving, from various countries and regions. The application provides step-by-step instructions, video tutorials, and information on the cultural signific…
Culture	Culture Reflection	Culture Reflection is a software application that allows users to reflect on their own cultural background and gain a deeper understanding of their cultural identity. It provides a series of thought-provoking prompts and questions that encourage users to explore their beliefs, values, traditions, and experiences. Users can journal their reflections and engage in self-discovery, fostering personal…
Culture	Culture Journey Planner	A software application that helps users plan and organize their cultural journeys to different countries and regions around the world. It provides users with information on popular landmarks, museums, festivals, and cultural events in each destination. Users can create personalized itineraries, save favorite places, and access travel tips and recommendations. The application also offers language …
Culture	Cultural Traditions	Cultural Traditions is a software application that offers users an immersive experience of exploring and learning about the unique cultural traditions from different countries and regions around the world. Users can delve into the rich tapestry of customs, rituals, festivals, and practices that define the cultural heritage of diverse communities. The application provides detailed descriptions, en…
Culture	Cultural Conversations	Cultural Conversations is a software application that provides a platform for individuals from different cultures to engage in meaningful conversations and share their experiences. Users can join discussion groups based on common interests or topics and connect with like-minded individuals from around the world. The application encourages cross-cultural dialogue, promotes understanding, and foste…
Culture	Cultural Connections Quiz	The Cultural Connections Quiz is a software application that offers users a fun and interactive way to test their knowledge of different cultures through trivia questions and quizzes.
Culture	Culture Discovery	Culture Discovery is a software application that provides users with a platform to discover and explore various aspects of different cultures worldwide, including food, fashion, traditions, music, and more. Users can delve into curated collections, browse through photo galleries, watch videos, and read articles to gain a deeper understanding of diverse cultures.
Culture	Culture Expressions	Culture Expressions is a software application that allows users to explore and learn about the unique expressive forms of different cultures around the world. Users can dive into various art forms, music styles, dance traditions, and storytelling techniques, gaining insights into the rich cultural heritage of diverse communities. The application offers interactive experiences such as art tutorial…
Culture	Cultural Traditions Quiz	The Cultural Traditions Quiz is a software application that offers users a fun and interactive way to test their knowledge of different cultural traditions through trivia questions and quizzes. Users can challenge themselves with multiple-choice questions about various customs, rituals, festivals, and practices from different countries and regions around the world.
Culture	Culture Puzzle	Culture Puzzle is a software application that offers users a fun and educational way to learn about different cultures through puzzle games. Each puzzle consists of pieces that represent different aspects of a culture, such as traditional clothing, iconic landmarks, and native animals. Users can solve the puzzles by matching the correct pieces and completing the cultural scenes. As users progress…
Culture	Culture Cuisine	Culture Cuisine is a software application that allows users to explore and learn about traditional recipes and culinary practices from different cultures around the world. Users can discover a wide range of dishes, including appetizers, main courses, desserts, and beverages, from various countries and regions. The application provides step-by-step instructions, ingredient lists, cooking tips, and…
Culture	Cultural Connections Quiz Challenge	In this software application, users can participate in a fun and interactive quiz challenge that tests their knowledge of different cultures. The quiz will include questions about various aspects of culture such as traditions, customs, festivals, food, music, and more... (remaining description provided above)
Culture	Culture Quiz Challenge	A fun and interactive quiz challenge that tests users
Culture	Cultural Experiences	Cultural Experiences is a software application that offers users interactive and immersive experiences of various cultural activities from different countries around the world. Users can virtually participate in traditional dances, art workshops, cooking classes, language lessons, and other cultural activities. The application provides step-by-step instructions, video tutorials, and real-time fee…
Data	Data Analyzer	The Data Analyzer is a software application that provides users with the ability to analyze and visualize data sets of various sizes and formats...
Data	Data Query Assistant	A software that allows users to easily query and retrieve specific information from a dataset.
Data	Data Visualizer	The Data Visualizer is a software application that allows users to create visually appealing and interactive visualizations of their data sets. It provides a wide range of visualization options, including bar charts, line graphs, scatter plots, and pie charts. Users can easily import their data, choose the appropriate visualization type, customize the appearance of the visualization, and export t…
Data	Data Summarizer	The Data Summarizer is a software application that provides users with a summary of their data sets. It analyzes the data and generates key insights, such as the mean, median, mode, and range for numerical data, and the frequency and distribution for categorical data. Users can easily import their data, choose the variables they want to analyze, and view the generated summary.
Data	Data Comparator	The Data Comparator is a software application that allows users to compare and identify differences between multiple data sets. It provides a simple and intuitive interface where users can import their data sets in various formats, such as CSV or Excel files. The software compares the data sets column by column and highlights any discrepancies or variations between them. Users can easily view the…
Data	Data Matcher	The Data Matcher is a software application that allows users to compare and match data from different datasets. Users can import two datasets and specify the fields they want to match. The software will identify records in the datasets that have the same values in the specified fields and provide a summary of the matched records. Users can easily view and export the matched records for further an…
Data	Data Profiler	The Data Profiler is a software application that automatically analyzes and profiles data sets, providing users with insights into the quality and characteristics of the data. It examines various aspects of the data, such as data types, missing values, and outliers, and generates summary statistics and visualizations to help users understand the data better.
Data	Data Merger	The Data Merger is a software application that allows users to merge multiple data sets into a single consolidated dataset. It provides an easy-to-use interface where users can import their data sets in various formats, such as CSV or Excel files. The software automatically identifies common fields between the data sets and combines the data based on those fields. Users can choose to merge the da…
Data	Data Correlator	The Data Correlator is a software application that allows users to identify and analyze correlations between different variables in a dataset. It provides a user-friendly interface where users can import their dataset and select the variables they want to analyze. The software performs statistical computations to calculate correlation coefficients, such as Pearson correlation or Spearman correlat…
Data	Data Cleanser	The Data Cleanser is a software application that helps users clean and preprocess their data sets by removing or correcting any errors, inconsistencies, or missing values. It provides a user-friendly interface where users can import their data sets and specify the cleaning operations they want to perform, such as removing duplicates, filling in missing values, or standardizing data formats. The D…
Data	Data Frequency Analyzer	The Data Frequency Analyzer is a software application that allows users to analyze the frequency distribution of data sets. It provides users with insights into how often each value appears in a given dataset. Users can easily import their data and specify the variables they want to analyze. The software generates a frequency table or histogram to visualize the distribution of values. This softwa…
Data	Data Anomaly Detector	The Data Anomaly Detector is a software application that automatically identifies and highlights anomalies or outliers in a given dataset. It analyzes the data using various statistical and machine learning techniques to detect abnormal patterns or values that deviate significantly from the expected behavior. Users can easily import their data sets and specify the variables or data fields they wa…
Data	Data Analyzer Plus	The Data Analyzer Plus is a software application that enhances the functionality of the existing Data Analyzer software. In addition to analyzing and visualizing data sets, it also provides advanced features such as predictive modeling, hypothesis testing, and trend analysis.
Data	Data Trend Analyzer	The Data Trend Analyzer is a software application that allows users to analyze and identify trends in their data sets. It provides users with insights into how data values change over time, allowing them to understand patterns and make informed decisions based on historical trends.
Data	Data Explorer	Data Explorer is a software application that allows users to explore and navigate through their data sets in an interactive and intuitive way. It provides a user-friendly interface where users can easily import their data sets and explore the variables, attributes, and relationships within their data. Users can perform a wide range of operations such as filtering, sorting, grouping, and aggregati…
Data	Data Anomaly Tracker	The Data Anomaly Tracker is a software application that allows users to track and monitor anomalies or outliers in their data sets over time. Users can import their datasets and specify the variables or data fields they want to analyze for anomalies. The software analyzes the data using statistical and machine learning techniques to detect abnormal patterns or values that deviate significantly fr…
Data	Data Correlation Analyzer	The Data Correlation Analyzer is a software application that allows users to analyze and identify correlations between different variables in a dataset. It provides users with statistical measures, such as correlation coefficients, to determine the strength and direction of the relationships between variables. Users can easily import their dataset and select the variables they want to analyze. Th…
Data	Data Identifier	The Data Identifier is a software application that automatically identifies the data type of each attribute in a dataset...
Data	Data Integrity Analyzer	The Data Integrity Analyzer is a software application that analyzes and evaluates the integrity of data sets, helping users identify and address data quality issues. It performs checks on data consistency, accuracy, completeness, and validity, providing users with a comprehensive assessment of the overall data integrity.
Data	Data Quality Validator	The Data Quality Validator is a software application that enables users to validate the quality of their datasets...
Data	Data Formatter	The Data Formatter is a software application that allows users to easily format and transform their data sets into a desired structure. Users can import their data in various formats, such as CSV or Excel files, and specify the formatting rules they want to apply. The software provides a wide range of formatting options, including changing data types, rearranging columns, removing duplicates, and…
Data	Data Converter	The Data Converter is a software application that allows users to easily convert data sets from one format to another. It provides a user-friendly interface where users can import their data sets in various formats, such as CSV, Excel, JSON, or XML files. The software supports a wide range of output formats, allowing users to convert their data sets to the desired format. Users can specify the co…
Data	Data Anomaly Predictor	The Data Anomaly Predictor is a software application that uses machine learning algorithms to predict and identify anomalies in a given dataset...
Data	Data Quality Analyzer	The Data Quality Analyzer is a software application that helps users analyze and assess the quality of their data sets. It performs checks and validations on data consistency, accuracy, completeness, and validity, providing users with insights into the overall data quality.
Data	Data Anomaly Explorer	The Data Anomaly Explorer is a software application that allows users to visually explore and investigate anomalies in their data sets. It provides users with an intuitive interface where they can easily import their data sets and choose the variables they want to analyze for anomalies. The software uses statistical and machine learning techniques to detect abnormal patterns or values in the data…
Data	Data Validation Assistant	The Data Validation Assistant is a software application that helps users validate and verify the quality and accuracy of their data sets. Users can easily import their data sets and specify the validation rules they want to apply. The software performs checks and validations on the data, such as data type validation, range validation, or uniqueness validation, and generates a report highlighting …
Data	Data Classifier	The Data Classifier is a software application that allows users to classify data sets based on their attributes or variables. It provides users with the ability to import their data sets and specify the target variable or class they want to predict. The software uses machine learning algorithms to train a classification model on the data and then applies the model to classify new instances. Users…
Data	Data Trend Analyzer Plus	The Data Trend Analyzer Plus is a software application that enhances the functionality of the existing Data Trend Analyzer software. In addition to analyzing and identifying trends in data sets, it also provides advanced features such as predictive modeling, hypothesis testing, and trend forecasting. Users can import their data sets, perform advanced statistical analysis and modeling, and generat…
Data	Data Predictor	The Data Predictor is a software application that allows users to make predictions based on their data sets. It provides users with the ability to import their data and specify the target variable they want to predict. The software uses machine learning algorithms to train a predictive model on the data and then applies the model to predict the outcome for new instances.
Data	Data Similarity Analyzer	The Data Similarity Analyzer is a software application that allows users to compare and measure the similarity between two or more datasets. Users can easily import their datasets and specify the variables or fields they want to compare. It performs a similarity analysis using techniques such as Jaccard similarity or cosine similarity and generates a similarity score or matrix to depict the simil…
Development	Error Logger	The Error Logger software is designed to keep track of errors and exceptions that occur during the development process. It provides a centralized platform where developers can log and categorize errors, making it easier to identify and fix bugs. The software allows users to add a timestamp, error message, and stack trace for each error, as well as assign it to a specific project or module. Additi…
Development	Code Review Assistant	Code Review Assistant analyzes code and provides suggestions for improvement based on best practices and coding standards. It can be implemented as a standalone tool or plugin for popular code editors. The software focuses on static code analysis and provides detailed recommendations for optimization, readability, and maintainability.
Development	Test Case Generator	The Test Case Generator software automates the process of generating test cases for software developers. It takes code snippets or function signatures as input and generates a set of test cases covering various scenarios and edge cases. The generated test cases can be exported in JSON or CSV format for further analysis and integration with testing frameworks.
Development	Code Documentation Generator	This software automatically generates documentation for source code, providing detailed information about classes, functions, and variables. It extracts comments and annotations from the code and formats them into readable documentation. The generated documentation can be exported as HTML or PDF for easy sharing and reference.
Development	Code Snippet Organizer	The Code Snippet Organizer software allows developers to efficiently store and categorize reusable code snippets. It provides a user-friendly interface where developers can add code snippets, assign tags or labels to them, and make them easily searchable. The software also includes features like syntax highlighting, code formatting, and the ability to preview or execute snippets directly within t…
Development	Code Complexity Analyzer	The Code Complexity Analyzer is a software designed to evaluate the complexity of code snippets and highlight potential areas for improvement. It analyzes the code using various metrics such as cyclomatic complexity, nesting depth, and code duplication. The software provides a visual representation of the complexity metrics, allowing developers to easily identify and understand complex sections o…
Development	Test Suite Manager	The Test Suite Manager software is designed to help software development teams manage and organize their test suites. It provides a centralized platform where teams can create, edit, and execute test suites for their projects. The software allows users to define test cases, assign them to specific test suites, and track their execution and results. It also provides features like test case priorit…
Development	Unit Test Coverage Analyzer	The Unit Test Coverage Analyzer is a development software designed to analyze the coverage of unit tests for a software project. It provides developers with insights into the effectiveness of their unit tests, helping them identify areas that require additional testing. The software analyzes the source code and the corresponding unit tests, calculating the percentage of code covered by the tests.…
Development	Code Dependency Viewer	The Code Dependency Viewer software is a development tool that provides a visual representation of the dependencies between code modules and classes in a project. It analyzes the source code and generates a graphical representation of the dependencies, highlighting the relationships between different components. This allows developers to easily visualize the structure of their codebase and unders…
Development	Code Review Dashboard	The Code Review Dashboard is a development software designed to provide a comprehensive overview of code reviews for software development teams. It aggregates data from code review tools and platforms (such as GitLab, GitHub, Bitbucket) to present key metrics and insights on code quality, review process, and team collaboration. The dashboard displays information like the number of open code revie…
Development	Project Task Organizer	The Project Task Organizer is a software application that helps development teams manage and organize their project tasks. It provides a centralized platform where teams can create, assign, and track tasks for their projects...
Development	Code Style Checker	The Code Style Checker is a development software that analyzes source code and checks for adherence to coding style guidelines and best practices. It provides automated code review and suggestions for improving code readability and maintainability. The software performs static code analysis and identifies issues such as inconsistent indentation, unused variables, incorrect naming conventions, and…
Development	Code Efficiency Analyzer	The Code Efficiency Analyzer is a development software designed to evaluate the efficiency of code snippets and provide recommendations for optimizing performance. It analyzes the code using metrics such as time complexity, space complexity, and algorithmic inefficiencies. The software provides insights into areas where code can be improved to reduce execution time or memory usage. It also sugges…
Development	Development Task Tracker	The Development Task Tracker is a software application that helps development teams manage and track their project tasks. It provides a user-friendly interface where teams can create, assign, and track tasks for their projects. The software allows users to set task priorities, due dates, and dependencies between tasks. It also provides features like task notifications, progress tracking, and task…
Development	Build Time Estimator	The Build Time Estimator software determines the estimated time required to build a software project based on various factors such as code complexity, number of modules, and development team size. It analyzes the source code and calculates the time required for compiling, linking, and other build processes. The software provides developers with insights into the expected build time, allowing them…
Development	Code Collaboration Manager	The Code Collaboration Manager software is designed to provide a collaborative platform for developers to work together on codebases. It allows multiple developers to access and edit the same code files simultaneously, with real-time updates and conflict resolution. The software includes features such as code highlighting, version control integration, and commenting, making it easy for developers…
Development	Development Task Planner	The Development Task Planner is a software application that helps development teams plan and organize their project tasks effectively...
Development	Code Quality Validator	The Code Quality Validator is a software application that analyzes source code and provides feedback on its adherence to coding standards and best practices. It performs static code analysis, identifies potential issues such as code smells, unused variables, and long method bodies, and suggests improvements to enhance code quality and maintainability.
Development	Code Duplication Finder	The Code Duplication Finder software is designed to detect and highlight duplicate code within a software project. It analyzes the source code files and identifies sections of code that are similar or identical. The software provides a visual representation of the duplicated code, allowing developers to easily locate and refactor it. It also generates a report with the specific instances of code …
Development	Profiler Assistant	Profiler Assistant is a software application that helps developers analyze and optimize the performance of their code. It provides insights into the execution time and resource usage of different code sections, helping developers identify bottlenecks and areas for improvement. The software allows users to profile their code in real-time or analyze pre-recorded profiling data. It provides visualiz…
Development	Code Dependency Analyzer	The Code Dependency Analyzer software analyzes code dependencies within a software project and provides a visual representation of the relationships between modules, classes, and functions. It helps developers understand how changes in one part of the code can impact other parts and identifies potential circular dependencies. The software can be implemented using static code analysis techniques w…
Development	Code Structure Validator	The Code Structure Validator is a development software that analyzes the structure of code files and provides feedback on adherence to coding style guidelines and best practices. It performs static code analysis and identifies issues such as inconsistent indentation, incorrect use of whitespace, missing or excessive comments, and improper file organization. The software highlights these issues an…
Development	Code Syntax Formatter	The Code Syntax Formatter analyzes and automatically formats source code files according to predefined coding style guidelines. It supports multiple programming languages and can be integrated into popular code editors as a plugin.
Development	Code Review Feedback Aggregator	The Code Review Feedback Aggregator is a development software designed to streamline the code review process by aggregating feedback from multiple code review tools and platforms...
Development	Code Coverage Heatmap	The Code Coverage Heatmap is a development software application that provides a visual representation of code coverage for a software project. It analyzes the source code and the corresponding unit tests, calculating the percentage of code covered by the tests. The software generates a heatmap where each code file is represented by a colored square, with the color intensity indicating the level o…
Development	Code Complexity Visualization	The Code Complexity Visualization software provides a visual representation of the complexity of code snippets. It analyzes the code using metrics such as cyclomatic complexity, nesting depth, and code duplication, and generates interactive visualizations to help developers understand and analyze complex code. The software allows users to zoom in and out, navigate through the code hierarchy, and …
Development	Code Size Estimator	The Code Size Estimator is a development software that helps estimate the size (in lines of code) of a software project. It analyzes the source code files and calculates the total number of lines in the project. The software provides developers with insights into the scale of the project, allowing them to plan resources and timelines effectively.
Development	Code Quality Metrics Analyzer	The Code Quality Metrics Analyzer software analyzes code quality metrics for a software project and provides insights into areas that require improvement. It calculates various metrics like code complexity, code duplication, code coverage, and adherence to coding style guidelines. The software generates visualizations and reports that help developers identify and prioritize code quality issues. I…
Development	Vulnerability Scanner	The Vulnerability Scanner is a development software that analyzes codebase and identifies potential security vulnerabilities...
Development	Notify Me	Notify Me is a development software application that helps developers stay updated on the latest news and updates related to their programming languages, frameworks, and libraries of interest. It provides a user-friendly interface where developers can select their favorite topics and sources. The application then aggregates and displays relevant articles, blog posts, tutorials, and release notes …
Entertainment	Movie Recommendation	This software provides personalized movie recommendations based on user preferences and viewing history. It analyzes genres, actors, directors, ratings to suggest similar movies. Users can create watchlists, rate movies, and save favorites. Recommendations can be filtered by release year, language, and runtime.
Entertainment	Fun Trivia	FunTrivia is an entertainment software application that allows users to explore a wide range of fun and interesting trivia questions across various categories. The app provides a user-friendly interface where users can select their preferred category and answer multiple-choice questions. The software tracks the user
Entertainment	Entertainment Quiz	A software application that allows users to participate in entertaining quizzes covering various topics such as movies, TV shows, music, sports, and general knowledge. Users can select a specific category or opt for a random quiz. Each quiz consists of multiple-choice questions, and users can track their scores and compete with friends. The app also provides explanations for correct answers to im…
Entertainment	Interactive Storytelling	This software provides users with an immersive experience of interactive storytelling. Users can choose their own adventure by making decisions that affect the storyline and outcome. The software offers a wide range of genres and themes, such as fantasy, mystery, romance, and sci-fi. Each story is accompanied by engaging visuals and sound effects to enhance the user experience.
Entertainment	Movie Trivia Challenge	A software application that tests users
Entertainment	Music Mashup Maker	Allow users to create personalized music mashups by combining songs from their library. They can adjust tempo, add effects, and choose from pre-set mashup templates. The software provides an intuitive interface and allows users to save and share their creations.
Entertainment	Joke Generator	This software generates a random joke based on user-selected categories. Users can choose from a variety of categories such as puns, knock-knock jokes, and one-liners. The software provides a user-friendly interface where users can easily navigate and view jokes. Users can also rate jokes and save their favorites for later.
Entertainment	Game Night	Game Night is an entertainment software application that allows users to host virtual game nights with a variety of classic board games, card games, and party games. Users can create private game rooms, invite friends, and play games in real-time. The software includes features like chat, customizable game settings, and leaderboards to enhance the gaming experience.
Entertainment	Movie Soundtrack Creator	This software allows users to create personalized soundtracks for their favorite movies by selecting and arranging songs categorized by genre, mood, and tempo. Users can also add sound effects and adjust volume levels. The software enables users to export the created soundtracks for personal or professional use.
Entertainment	Artistic Coloring Book	Artistic Coloring Book is an entertainment software application that offers a wide range of intricate coloring pages for users to explore their creativity. Users can select from various themes like nature, animals, fantasy, and more. The software provides a user-friendly interface where users can choose different color palettes, zoom in/out on specific areas, and save their completed artworks. It…
Entertainment	Audio Book Club	This software application allows users to join virtual audio book clubs and discuss their favorite books with other members. Users can explore various genres and select books they are interested in. They can listen to audio versions of the books and participate in group discussions through chat or voice calls. The software also provides recommendations based on users
Entertainment	FunMatch	FunMatch is an entertainment software application that offers a fun and engaging matching game experience. Users are presented with a grid of cards, each containing a unique image or symbol. The objective is to find pairs of matching cards by flipping them over. The game can be customized with different levels of difficulty and themes, such as animals, sports, or emojis. Users can track their sco…
Entertainment	Doodle Art Creator	This software allows users to create and share their own doodle art. Users can choose from a variety of drawing tools and colors to create unique doodles. The software provides various templates and backgrounds to help users get started. Users can save their doodles, share them with friends, and even participate in doodle challenges and competitions.
Entertainment	Photo Puzzle Solver	This software application allows users to solve photo puzzles by rearranging the pieces to form the correct image. Users can select from a variety of photo categories, such as landscapes, animals, or famous landmarks. The software provides a user-friendly interface where users can drag and drop puzzle pieces, rotate them if necessary, and receive hints or guidance if they get stuck.
Entertainment	Trivia Challenge Battle	This software is a multiplayer trivia game that allows users to compete against each other in various categories. Players can create private rooms and invite friends to join the game. The software randomly selects a category and presents multiple-choice questions to each player. The player with the highest score at the end of the game wins. The software also includes a leaderboard to track the ov…
Entertainment	Music Concert Live Stream	The Music Concert Live Stream software allows users to watch live streams of their favorite music concerts and performances from the comfort of their own homes.
Entertainment	Music Playlist Generator	The Music Playlist Generator is a software application that allows users to easily create personalized music playlists based on their mood and genre preferences. Users can input their current mood (happy, sad, energetic, etc.) and select their preferred genre of music (pop, rock, hip-hop, etc.). The software then analyzes a vast database of songs and generates a customized playlist that matches t…
Entertainment	Puzzle Game Mania	This software is a collection of various puzzle games that offer a challenging and entertaining experience for users. It includes popular puzzle games like Sudoku, crossword puzzles, jigsaw puzzles, and word searches. Users can select their preferred game and difficulty level, track their progress, and compete with friends for the fastest completion time. The software also provides hints and solu…
Entertainment	Dance Party	Dance Party is an entertainment software application that allows users to have virtual dance parties with their friends. Users can select from a variety of dance styles, such as hip-hop, salsa, or ballet, and follow along with interactive dance tutorials. The software provides visual cues and step-by-step instructions to help users learn the dance moves. Users can also compete against each other …
Entertainment	Sports Quiz	A software application that allows users to test their knowledge in various sports disciplines. Users can choose a specific sport or opt for a random quiz. Each quiz consists of multiple-choice questions related to the rules, players, and historical events of the chosen sport. Users can track their scores and compete with friends to see who has the highest sports IQ. The app also provides explana…
Entertainment	Movie Trivia Challenge Battle	This software is a multiplayer trivia game that allows users to compete against each other in movie-related categories. Players can create private rooms and invite friends to join the game. The software randomly selects a category (such as action, comedy, or sci-fi) and presents multiple-choice questions related to movies in that category. The player with the highest score at the end of the game …
Entertainment	Music Beat Maker	This software allows users to create their own music beats by selecting and arranging different sound samples and loops. Users can choose from various genres like hip-hop, electronic, or rock and experiment with different rhythm and melody combinations. The software provides an intuitive interface where users can drag and drop sound samples onto a timeline, adjust volume levels, and add effects l…
Entertainment	Virtual Art Gallery	The Virtual Art Gallery is a software application that allows users to explore and experience art from the comfort of their own homes. Users can browse through a collection of digital art pieces created by various artists and learn about the artists and their artistic styles. They can zoom in on specific details and view the artworks from different angles. The software provides a user-friendly in…
Entertainment	Night Sky Stargazer	Night Sky Stargazer is an entertainment software application that allows users to explore and learn about the wonders of the night sky. Users can navigate through a virtual starry sky, identify constellations, and learn interesting facts about stars, planets, and other celestial objects. The software provides a user-friendly interface where users can zoom in on specific areas, toggle different la…
Entertainment	Food Recipe Master	A software application that provides users with a wide range of food recipes from different cuisines. Users can search for recipes based on ingredients, dietary restrictions, or cooking time. The software offers step-by-step instructions, ingredient lists, and cooking tips for each recipe. Users can save their favorite recipes, create meal plans, and even generate shopping lists. The software als…
Entertainment	Music Karaoke	This software allows users to sing and record their favorite songs karaoke-style. Users can select from a wide range of songs across different genres and languages. The software provides synchronized lyrics and background music, and users can record their vocals using their device
Entertainment	Guess That Tune Trivia	"Guess That Tune Trivia" is a software application that challenges users to identify songs based on short audio clips. Users can select a specific genre or opt for a random mix of genres. The software plays a short snippet of a song, and users have to guess the title and artist of the song. The app keeps track of the user
Entertainment	Movie Quote Trivia	A software application that challenges users to guess the movie based on famous quotes. Users are presented with a quote and given multiple-choice options to select the correct movie. The app keeps track of the user
Entertainment	Travel Destination Explorer	The Travel Destination Explorer is an entertainment software application that allows users to virtually explore different travel destinations around the world. Users can browse through a collection of high-resolution images and immersive videos of popular tourist spots, landmarks, and natural wonders. The software provides detailed information about each destination, including historical facts, l…
Entertainment	Music Playlist Mixer	The Music Playlist Mixer is an entertainment software application that allows users to create unique and personalized music playlists by combining songs from different genres. Users can select their favorite genres and set the desired mood of the playlist (such as relaxing, energetic, or romantic). The software will then analyze the selected genres and create a playlist that seamlessly transition…
Family&Kids	StoryTime Companion	A software that enhances bedtime story reading by providing interactive animations and voice-over narration.
Family&Kids	MyFamilyConnect	MyFamilyConnect is a centralized hub for families to stay connected and share information. It includes features like sharing updates, photos, and announcements, a shared calendar, a task manager, and a messaging system.
Family&Kids	Artistic Adventures	A software that helps children explore and develop their creativity through various artistic activities such as drawing, painting, and crafting.
Family&Kids	Storytime Fun	A software application that allows parents to create and customize interactive storybooks for their children. Parents can choose from a variety of themes, characters, and settings, and create personalized stories by adding their own text and images. The app also includes features such as voice-over recording, sound effects, and interactive elements like puzzles or quizzes. Children can then read …
Family&Kids	Happy Moments	Happy Moments is a software application that allows families to capture, save, and organize their special moments in a digital format...
Family&Kids	Chores Helper	ChoresHelper is a software application that helps parents and children manage household chores effectively...
Family&Kids	Chore Buddy	Chore Buddy is a software application that helps parents manage household chores and teach responsibility to their children. The app allows parents to create chore lists, set deadlines, and assign tasks to their children. Children can mark tasks as complete and earn points for their accomplishments. Parents can track their children
Family&Kids	Toy Organizer	A software that helps parents and kids keep track of their toy inventory and organizing them effectively. It allows users to categorize toys, create virtual bins or shelves, and easily locate toys when they are needed. The software also provides a feature to set reminders for toy rotation or donation. Additionally, it offers suggestions for age-appropriate toys based on the child
Family&Kids	Time Travel Adventure	Time Travel Adventure is a software application that allows children to explore different time periods and learn about history through interactive storytelling and educational games.
Family&Kids	FamilyMovieNight	FamilyMovieNight is a software application that provides a platform for families to have a virtual movie night together...
Family&Kids	Interactive Math Fun	Interactive Math Fun is a software application that aims to make learning math enjoyable and engaging for children...
Family&Kids	FamilyCookingFun	FamilyCookingFun is a software application that allows families to come together and bond over cooking and trying new recipes. It provides a library of easy-to-follow recipes suitable for all ages, and includes step-by-step instructions and ingredient lists. The app also offers interactive features such as cooking timers, ingredient substitution suggestions, and a virtual grocery list for easy me…
Family&Kids	FunLearning	FunLearning is a software application that makes learning fun and interactive for children. It includes educational games and activities across subjects like math, science, language arts, and social studies. Features like colorful visuals, engaging animations, and interactive quizzes help children grasp concepts while keeping them entertained.
Family&Kids	PhotoScrapBook	PhotoScrapBook is a software application that allows families to create digital scrapbooks of their precious memories. Users can upload and organize photos, add captions and notes, and customize the layout and design of each page. The app also offers a variety of templates, stickers, and decorative elements to enhance the visual appeal of the scrapbook. Families can share their scrapbooks with ea…
Family&Kids	Family Chore Challenge	Family Chore Challenge is a software application that gamifies household chores and motivates children to actively participate in completing tasks by turning chore completion into a friendly competition. Parents can create chore lists, assign points to each task, and set deadlines. Children earn points by completing their chores on time, and their progress is tracked on a leaderboard. The app als…
Family&Kids	Family Fitness Fun	FamilyFitnessFun is a software application that encourages families to engage in physical activities together and promotes a healthy lifestyle. It provides a variety of fun and interactive fitness challenges and workouts suitable for all ages. The app tracks individual and family progress, sets goals, and provides rewards for achieving milestones. It also offers video tutorials, fitness tips, and…
Family&Kids	Family Goal Tracker	FamilyGoalTracker is a software application that helps families set and track goals together, promoting teamwork and accomplishment. It allows users to create and assign goals, set deadlines, and track progress. The app provides visualizations and reminders to keep families motivated and accountable. Families can celebrate their achievements and learn from the challenges they face together.
Family&Kids	Play Learn	Play Learn is a software application that combines fun games and educational activities to promote learning and development in children. The app provides a variety of games across different subjects like math, science, language arts, and critical thinking. Each game is designed to be engaging and interactive, allowing children to learn while having fun. The app also offers progress tracking and p…
Family&Kids	Nature Explorer	Nature Explorer is a software application that allows children to learn about and explore the wonders of nature through interactive activities and educational content. It includes features such as virtual tours of different ecosystems, animal and plant identification, nature-themed quizzes and puzzles, and educational videos about wildlife and conservation. Children can also track their outdoor a…
Family&Kids	FamilyHealthTracker	FamilyHealthTracker is a software application that helps families track and manage their overall health and wellbeing. It provides features such as personalized health profiles for each family member, the ability to input and monitor vital health metrics like weight, height, and blood pressure, and a calendar to schedule and track appointments and medications. The app also offers informative arti…
Family&Kids	Family Cooking Time	FamilyCookingTime is a software application that encourages families to cook together and bond over preparing meals. It provides a variety of easy-to-follow recipes suitable for all ages. Users can select recipes based on their dietary preferences and access step-by-step instructions, ingredient lists, and cooking tips. The app also offers interactive features such as timers, ingredient substitut…
Family&Kids	FamilyMusicJam	FamilyMusicJam is a software application that allows families to create and enjoy music together. It provides a variety of virtual musical instruments, including keyboards, drums, guitars, and more. Users can play instruments individually or collaborate with family members to create harmonious melodies. The app also offers features like pre-recorded tracks, a built-in metronome for timing, and ba…
Family&Kids	FunQuizTime	FunQuizTime is a software application that offers a wide range of fun and educational quizzes for children. It includes various topics such as math, science, history, language arts, and general knowledge. The quizzes are designed to be interactive and engaging, with colorful visuals and animated characters. Children can select their preferred subject and difficulty level, and the app provides ins…
Family&Kids	MindfulKids	MindfulKids is a software application that introduces children to mindfulness practices in a fun and interactive way. It includes guided meditation sessions designed specifically for kids, breathing exercises, and mindful activities such as coloring or journaling. The app also offers age-appropriate mindfulness games and puzzles to help children develop focus, relaxation, and emotional awareness …
Family&Kids	FamilySchedule	FamilySchedule is a software application that helps families organize and manage their daily schedules by providing a shared calendar, task lists, and reminders.
Family&Kids	FitnessStory	FitnessStory is a software application that combines storytelling and physical activities to promote fitness and storytelling skills in children. The app offers a variety of interactive stories where the characters embark on fitness adventures. Children can follow along with the story and participate in exercises and movements inspired by the narrative. The app provides step-by-step instructions …
Family&Kids	Healthy Habits Tracker	Healthy Habits Tracker is a software application that helps families track and maintain healthy habits. It allows users to set goals for various aspects of health such as nutrition, physical activity, sleep, and screen time. The app provides a simple interface to input daily progress and offers visualizations to monitor long-term progress. It also includes informative articles and tips to educate…
Family&Kids	GardenTime	GardenTime is a software application that helps children learn about gardening and develop their green thumbs through interactive activities and educational content. It provides information about various plants, gardening techniques, and environmental sustainability. The software includes features like plant identification, gardening tutorials, tips on soil preparation, watering schedules, and in…
Family&Kids	FamilyTimeChat	FamilyTimeChat is a software application that provides a safe and secure messaging platform for families to communicate with each other. It includes features such as individual and group messaging, voice and video calling, and the ability to share photos, videos, and documents. The app also offers customizable privacy settings and parental controls to ensure a safe digital environment for childre…
Family&Kids	FamilyArtStudio	FamilyArtStudio is a software application that provides a virtual art studio for families to engage in collaborative art projects. Users can create their own masterpieces or work together on a shared canvas, allowing family members to express themselves artistically and bond over the process.
Finance	Money Tracker	Money Tracker is a simple application that allows users to track their income and expenses. Users can input their income and expenses and categorize them into different categories such as food, transportation, entertainment, etc. The application will provide a visual representation of their spending habits through charts and graphs, allowing users to easily see where their money is going. Additio…
Finance	Budget Buddy	Budget Buddy is a finance software application that helps users manage their personal finances effectively...
Finance	Financial Planner	A software application that helps individuals manage their personal finances by providing tools and resources for budgeting, expense tracking, goal setting, and investment planning. It allows users to track their income, expenses, and savings, and provides visualizations and reports to help users analyze their financial situation. The application also offers educational resources and tips for fin…
Finance	Expense Assistant	Expense Assistant is a finance software application that helps users track and manage their expenses. Users can input their expenses and categorize them into different categories such as food, transportation, utilities, etc. The application provides visualizations of spending patterns and offers budgeting tools with reminders.
Finance	Finance Insights	Finance Insights is a software application that provides users with detailed insights into their financial habits. It helps users analyze their income and expenses by providing visual representations and reports. The main function of the software is to provide users with comprehensive financial analysis and suggestions to improve their financial well-being.
Finance	Expense Planner	Expense Planner is a finance software application that helps users plan and manage their expenses more effectively. Users can input their monthly income and set their target savings. The application will then provide assistance in allocating their income into different expense categories, such as food, transportation, rent, etc. Users can also input their desired savings goals and the application…
Finance	Savings Tracker	The Savings Tracker is a finance software application that helps users track their savings and monitor their progress towards their savings goals. Users can input their savings amount and set a target goal for a specific time period. The application will provide a visual representation of their savings progress through charts and graphs. Users can also track their savings history and view their s…
Finance	Expense Analyzer	Expense Analyzer is a finance software application that helps users analyze their expenses and identify areas where they can cut costs and save money. Users can input their expenses and categorize them into different categories such as groceries, entertainment, utilities, etc. The application will provide visualizations and reports that show users how much they are spending in each category and h…
Finance	Expense Consolidator	Expense Consolidator is a finance software application that helps users consolidate and analyze their expenses from different sources. Users can connect their bank accounts, credit cards, and other financial accounts to the application. The software will then automatically retrieve and categorize their expenses from these accounts into different categories such as food, transportation, utilities,…
Finance	Expense Comparator	Expense Comparator is a finance software application that helps users compare their expenses across different time periods. Users can input their expenses and categorize them into different categories such as groceries, transportation, entertainment, etc. The application will provide a visual representation of their expenses through charts and graphs, allowing users to easily compare their spendi…
Finance	Financial Goal Tracker	Financial Goal Tracker is a finance software application that helps users set and track their financial goals. Users can input their specific financial goals, such as saving for a vacation, buying a house, or paying off debt. The application will provide tools and visualizations to track progress towards these goals, including a goal progress bar, timelines, and reminders. Users can also set mile…
Finance	Expense Monitor	Expense Monitor is a finance software application that helps users monitor and manage their expenses. Users can input their expenses and categorize them into different categories such as groceries, transportation, entertainment, etc. The application provides visualizations and reports that show users how much they are spending in each category and how it compares to their budget. Additionally, th…
Finance	Finance Expense Organizer	Finance Expense Organizer is a software application that helps users organize and categorize their expenses. Users can input their expenses and categorize them into different categories such as groceries, transportation, entertainment, etc. The application provides a clear and user-friendly interface for managing and tracking expenses.
Finance	Financial Progress Tracker	Financial Progress Tracker is a finance software application that allows users to set and track their financial goals. Users can input their specific goals, such as saving for a vacation, paying off debt, or building an emergency fund. The software provides tools and visualizations to track progress towards these goals, including a goal progress bar, timelines, and reminders. Users can also set m…
Finance	Finance Expense Tracker	Finance Expense Tracker is a user-friendly finance software application that helps users track and manage their expenses. Users can input their expenses and categorize them into different categories such as groceries, transportation, entertainment, etc. The application provides visualizations and reports that show users how much they are spending in each category and how it compares to their budg…
Finance	Budget Planner	Budget Planner is a finance software application that helps users create and manage their budgets. Users can input their income, expenses, and savings goals, and the application will provide personalized budgeting recommendations and suggestions. It will also track spending and provide visualizations to show users their progress towards their budget goals.
Finance	Financial Scheduler	Financial Scheduler is a finance software application that helps users schedule and plan their financial transactions. Users can input their recurring income and expenses, such as paychecks, bills, and subscriptions. The application will provide a clear calendar view of their financial schedule, allowing users to easily see when their income will be received and when their expenses are due. Addit…
Finance	Finance Tracker Lite	Finance Tracker Lite is a simple finance software application that helps users track their income and expenses. Users can input their income and expenses and categorize them into different categories such as food, transportation, entertainment, etc. The application will provide a visual representation of their spending habits through charts and graphs. It also includes basic budgeting tools to he…
Finance	Financial Goal Manager	Financial Goal Manager is a finance software application that helps users set and manage their financial goals. Users can input their specific goals, such as saving for retirement, buying a house, or paying off debt. The application will provide tools and resources to track progress towards these goals, including goal trackers, milestone notifications, and personalized financial advice. Users can…
Finance	Finance Assistant	Finance Assistant is a finance software application that provides personalized financial guidance and assistance. Users can input their income, expenses, and savings goals, and the application will provide recommendations and suggestions to help them achieve their financial objectives. The software will also offer educational resources and tips on budgeting, investing, and saving.
Finance	Expense Planner Deluxe	Expense Planner Deluxe is a finance software application that takes expense planning to the next level. In addition to helping users allocate their income into different expense categories, it also offers advanced features such as expense forecasts, automated bill payments, and financial goal tracking. Users can input their monthly income and desired savings goals, and the application will genera…
Finance	Finance Budget Monitor	Finance Budget Monitor is a finance software application that helps users monitor and track their budget. Users can input their income and expenses and categorize them into different categories such as groceries, entertainment, transportation, etc. The application provides visualizations and reports that show users how much they are spending in each category and how it compares to their set budge…
Finance	Finance Goal Planner	The Finance Goal Planner is a finance software application that helps users set and track their financial goals. Users can input their specific goals, such as saving for a vacation, paying off debt, or building an emergency fund. The application will provide tools and visualizations to track progress towards these goals, including a goal progress bar, timelines, and reminders. Users can also set …
Finance	Financial Expense Analyzer	The Financial Expense Analyzer is a finance software application that helps users analyze their expenses and identify areas where they can cut costs and save money. Users can input their expenses and categorize them into different categories such as groceries, transportation, utilities, etc. The application will provide visualizations and reports that show users how much they are spending in each…
Finance	Investment Tracker	Investment Tracker is a finance software application that helps users track and manage their investment portfolios. Users can input their investments, including stocks, bonds, mutual funds, and other assets, and categorize them into different categories such as growth, income, and balanced portfolios. The application will provide visualizations and reports that show users the performance of their…
Finance	Expense Categorizer	The Expense Categorizer is a finance software application that helps users categorize their expenses into different categories based on their spending habits. Users can input their expenses and the application will automatically categorize them into predefined categories such as food, transportation, entertainment, utilities, etc. Users can also customize and create their own categories. The main…
Finance	Expense Analyzer Pro	Expense Analyzer Pro is a finance software application that goes beyond basic expense analysis. In addition to helping users track and categorize their expenses, it provides advanced features such as expense forecasting, personalized cost-cutting suggestions, and savings recommendations. Users can input their expenses and categorize them into different categories such as groceries, transportation…
Finance	Finance Revenue Analyzer	Finance Revenue Analyzer is a finance software application that helps businesses track and analyze their revenue. Users can input their revenue data and categorize it into different sources such as product sales, services, subscriptions, etc. The application provides visualizations and reports that show users how much revenue they are generating from each source and how it compares to their targe…
Finance	Expense Splitter	Expense Splitter is a finance software application that helps users split expenses among a group of people. Users can input their expenses and the names of the individuals involved, and the application will calculate and distribute the expenses evenly. Additionally, the software provides a summary of each individual
Finance	Budget Optimizer	Budget Optimizer is a finance software application that helps users optimize their budget by analyzing their income and expenses. It provides users with personalized recommendations on how to allocate their income to various expense categories in order to achieve their financial goals. The application takes into account the user
Graphics	PaintPal	PaintPal is a graphics software application that provides a simple and intuitive interface for digital painting and drawing. It includes a variety of brush tools, color palettes, and layer management features to help artists create stunning digital artwork. With PaintPal, users can easily adjust brush sizes, opacity, and blend modes to achieve the desired artistic effects. The software also allow…
Graphics	Image Enhancer	The Image Enhancer software is designed to improve the quality and appearance of images by providing various editing tools and filters for color enhancement, brightness adjustment, contrast adjustment, edge sharpening, noise reduction, and artistic effects. It offers a user-friendly interface and intuitive controls for easy image enhancement.
Graphics	Art Renderer	ArtRenderer is a graphics software application that utilizes advanced rendering techniques to generate artistic renderings from input images. The software applies various artistic filters and effects to transform the original photograph or image into a stylized version that resembles a painting or sketch. Users can adjust parameters such as brush strokes, color palettes, and texture intensity to …
Graphics	Graphics Editing Assistant	A software that assists graphic designers in editing and enhancing their designs, providing a range of tools for cropping, resizing, color correction, and applying filters. It supports popular file formats, offers real-time previews, and includes features like layer management and text editing.
Graphics	ColorPalette Generator	The ColorPalette Generator is a software that allows users to generate custom color palettes for their graphic design projects. Users can input their preferred color values or select colors from a color wheel, and the software will generate a cohesive color palette based on the selected colors.
Graphics	ZoomSketch	Real-time collaborative sketching software where multiple users can draw together on a shared canvas.
Graphics	Decorator	The Decorator software is designed to provide graphic designers with a wide range of decorative elements that can be easily applied to their designs. It includes a library of pre-designed patterns, borders, frames, and ornaments that can be mixed and matched to create unique and visually appealing designs. Users can easily apply these decorative elements to their artwork with a simple drag-and-dr…
Graphics	Vector Creator	Vector Creator is a graphics software that allows users to easily create and edit vector graphics. It provides intuitive drawing tools, precise control over vector properties, and extensive editing options. Users can create shapes, lines, and curves, adjust properties like color and stroke width, and arrange elements in layers. Vector Creator is a simple and user-friendly software, focusing solel…
Graphics	PixelArtify	Convert any image into pixel art and customize the size of pixels, color palette, and apply different effects. Provides manual editing tools for refining pixel art creations.
Graphics	GraphicBuilder	GraphicBuilder is a graphics software application that allows users to create and edit high-quality vector and raster graphics. It provides a wide range of tools and features, including drawing shapes, applying colors and gradients, adding text, manipulating layers, and applying effects. With an intuitive and user-friendly interface, users can easily create professional-looking graphics for vario…
Graphics	Graphics Editor	This software allows users to edit and enhance graphical images. It provides a range of essential editing functions such as cropping, resizing, rotating, and adjusting brightness/contrast. Users can also add text, shapes, and filters to their images. The software supports various file formats and ensures high-quality output. It has a user-friendly interface with intuitive controls for easy naviga…
Graphics	GraphicOrganizer	GraphicOrganizer is a graphics software application that provides a visual workspace for organizing and arranging graphic elements. It allows users to create customizable grids, drag and drop graphic elements onto the grid, and easily rearrange them to create visually appealing compositions. GraphicOrganizer includes various grid templates and a library of pre-designed graphic elements such as sh…
Graphics	ShapeMaster	ShapeMaster is a graphics software application that focuses on creating and editing geometric shapes. It provides a variety of tools for drawing and manipulating shapes, including rectangles, circles, triangles, polygons, and more. Users can easily customize the size, position, and style of the shapes, and apply colors, gradients, and patterns. ShapeMaster also offers features such as aligning, g…
Graphics	Texture Maker	Texture Maker is a graphics software application that allows users to create custom textures for use in digital art and design projects. It provides a variety of tools and features for generating unique textures, including brushes, noise patterns, color blending modes, and texture overlays. Users can adjust parameters such as scale, intensity, and randomness to create different textures with vari…
Graphics	DesignBoard	DesignBoard is a graphics software application that provides a digital workspace for graphic designers to brainstorm, plan, and organize their design projects. It offers a versatile canvas where users can freely drag and drop various design elements, such as shapes, images, and icons, to create visual compositions. DesignBoard also includes tools for annotating, labeling, and connecting these ele…
Graphics	PatternMaker	PatternMaker is a graphics software application that allows users to easily create and customize patterns for use in various design projects. Users can choose from a library of pre-designed patterns or create their own from scratch. The software provides intuitive tools for adjusting pattern size, rotation, and color, as well as options for applying different effects and styles. With PatternMaker…
Graphics	Shape Transformer	ShapeTransformer is a graphics software application that allows users to transform and manipulate geometric shapes. With ShapeTransformer, users can resize, rotate, skew, and distort shapes to create unique and visually appealing designs. The software provides a variety of transformation tools and options, including precise controls for adjusting transformation parameters. It also supports multip…
Graphics	Doodle Designer	Doodle Designer is a graphics software application that allows users to create and edit doodles and hand-drawn illustrations. It provides a range of tools, such as brushes of different sizes and styles, erasers, and color palettes, that mimic the experience of drawing on paper. Users can easily adjust brush parameters like opacity and thickness to achieve the desired doodle effects. Doodle Design…
Graphics	Gradient Maker	The Gradient Maker software is a graphics software application that allows users to create custom gradients for use in their design projects. It provides a variety of tools and features for generating gradients, including color selection, gradient type selection (linear or radial), and gradient direction adjustment (horizontal, vertical, diagonal). Users can adjust color stops, opacity, and posit…
Graphics	Pixel Color Picker	PixelColorPicker is a graphics software application that allows users to easily pick colors from digital images or screenshots. Users can hover over any pixel on the image and view the corresponding color value in various formats such as RGB, HEX, and HSL. PixelColorPicker also provides a color palette for saving and organizing selected colors. It is a convenient tool for graphic designers, artis…
Graphics	Color Scheme Designer	Color Scheme Designer is a graphics software application that allows users to create and customize color schemes for their design projects. It provides various tools and features for selecting and combining colors, including color pickers, color wheels, and color palettes. Users can adjust saturation, brightness, and contrast to create harmonious color combinations. The software also offers templ…
Graphics	Image Mosaic Maker	Image Mosaic Maker is a graphics software application that allows users to create mosaic art from their digital images. Users can choose a base image and select a collection of smaller images to use as tiles. The software automatically arranges and blends the tiles to recreate the base image using a mosaic effect. Users can adjust parameters such as tile size, spacing, and color blending to custo…
Graphics	ColorBlend	ColorBlend is a graphics software application that allows users to create custom color blends for their design projects. It provides a variety of tools and features for selecting and blending colors, including color pickers, sliders, and preset gradients. Users can adjust the opacity, direction, and position of color blends to create unique and visually appealing gradients. The software supports …
Graphics	Graphic Pattern Maker	GraphicPatternMaker is a graphics software application that allows users to create and customize seamless patterns for use in their design projects. It provides a variety of tools and features for selecting and arranging patterns, including pattern libraries, pattern templates, and pattern blending options. Users can adjust parameters such as scale, rotation, and opacity to create unique and visu…
Graphics	Image Fusion	Image Fusion is a graphics software application that combines multiple images into a single composite image. It provides various blending modes and blending algorithms that allow users to seamlessly merge images together. Users can adjust the transparency, position, and size of each image layer to achieve the desired composition. Image Fusion also includes tools for aligning and matching overlapp…
Graphics	Art Element Organizer	Art Element Organizer is a graphics software application that provides a visual workspace for graphic designers to organize and categorize different art elements. It allows users to import and arrange images, icons, illustrations, and other graphical assets into custom folders and collections. Users can easily search and filter art elements based on categories, tags, or metadata. Art Element Orga…
Graphics	ColorPalette Customizer	A graphics software application that allows users to customize existing color palettes or create their own unique color palettes for their design projects. It provides a variety of tools and features for selecting, adjusting, and combining colors, including color pickers, sliders, and swatch libraries. Users can adjust the saturation, brightness, and contrast of each color, as well as create grad…
Graphics	Animation Creator	Animation Creator is a graphics software application that allows users to create and edit animations. It provides a variety of tools and features for designing and animating characters, objects, and scenes. Users can easily create keyframes, adjust timing, and apply smooth transitions between frames. The software supports various animation techniques such as traditional frame-by-frame animation, …
Graphics	Layout Designer	Layout Designer is a graphics software application that allows users to design and create layouts for various purposes, such as print materials, web pages, and presentations. It provides a wide range of tools and features, including drag and drop functionality, grid systems, alignment guides, and templates. Users can easily arrange and organize text, images, and graphical elements within the layo…
Graphics	Texture Generator	Texture Generator is a graphics software application that allows users to create custom textures for use in digital art and design projects. It provides a variety of tools and features for generating unique textures, including brushes, noise patterns, color blending modes, and texture overlays. Users can adjust parameters such as scale, intensity, and randomness to create different textures with …
Health&Fitness	Fitness Tracker	Build a fitness tracking app that helps users log their workouts, set goals, and track their progress towards their fitness targets.
Health&Fitness	FitTrack	Track and analyze users
Health&Fitness	Calorie Counter	Calorie Counter is a simple and effective software that allows users to track their daily caloric intake. With easy food input, the software calculates and displays the total calories consumed. Users can also set daily calorie goals and monitor their progress towards meeting those goals.
Health&Fitness	SmartRoutines	SmartRoutines is a fitness app that utilizes artificial intelligence to create personalized workout routines for users based on their fitness level and goals. The app includes a library of exercises with detailed instructions and demonstration videos. Users can input their preferences, such as the type of workout, duration, and equipment availability, and the app will generate a customized routin…
Health&Fitness	HealthGoals	HealthGoals is a software application that helps users set and track their health and fitness goals. Users can input their desired goals, such as weight loss, muscle gain, or overall fitness improvement. The app provides personalized recommendations and creates a schedule for users to follow. It also includes a progress tracking feature with visual representations, allowing users to see their pro…
Health&Fitness	FitChallenger	FitChallenger is a health and fitness software application that allows users to participate in fitness challenges and track their progress. Users can join various challenges based on their interests and goals, such as weight loss, strength building, or endurance. The app provides workout plans, nutrition guidelines, and motivational content to support users throughout the challenge. Users can tra…
Health&Fitness	Healthy Habits	Healthy Habits is a software application that helps users develop and maintain healthy daily habits. Users can create a personalized list of habits they want to incorporate into their lifestyle, such as drinking enough water, getting enough sleep, or exercising regularly. The app provides reminders and notifications to help users stay on track and complete their daily goals. Users can track their…
Health&Fitness	Daily Fitness Challenge	Daily Fitness Challenge is a software application that provides users with a new fitness challenge every day. Each challenge is designed to target different muscle groups or focus on specific fitness goals, such as strength, endurance, or flexibility. Users can choose to participate in the challenge and track their progress throughout the day. The app also includes video demonstrations and instru…
Health&Fitness	FitnessCoach	FitnessCoach is a software application that provides personalized workout plans and coaching for users based on their specific fitness goals and preferences. The app includes a library of exercises with detailed instructions and demonstration videos. Users can input their fitness goals, current fitness level, available equipment, and preferred workout duration. FitnessCoach will then generate a c…
Health&Fitness	Healthy Tracker	HealthyTracker is a software application that helps users track and manage their overall health and well-being. It allows users to input and monitor various aspects of their health, including physical activity, water intake, sleep quality, and mood. The app provides visual representations and progress reports to help users understand their health patterns and make necessary adjustments. HealthyTr…
Health&Fitness	FitBuddy	FitBuddy is a software application that provides personalized workout recommendations and tracking for users based on their fitness goals and preferences. The app includes a library of exercises with detailed instructions and demonstration videos. Users can input their goals, such as weight loss, muscle gain, or endurance improvement, as well as their current fitness level and available equipment…
Health&Fitness	FlexiYoga	FlexiYoga is a software application that provides personalized yoga routines for users based on their fitness level and flexibility goals. The app includes a library of yoga poses with detailed instructions and demonstration videos. Users can input their desired goals, such as improving flexibility, relieving stress, or increasing strength, as well as their current fitness level. FlexiYoga will t…
Health&Fitness	Calorie Burner	Calorie Burner is a software application that allows users to track and monitor the number of calories burned during physical activities and workouts. Users can select from a list of common activities or input custom activities to calculate the calories burned. The app provides real-time tracking of calories burned and displays an overview of the user
Health&Fitness	Fitness Planner	FitnessPlanner is a software application that helps users create personalized fitness plans and schedule their workouts. Users can input their fitness goals, such as weight loss, muscle gain, or overall fitness improvement, and specify the number of workout days per week. The app generates a customized plan that includes a variety of exercises targeting different muscle groups. It also provides r…
Health&Fitness	Workout Planner	Workout Planner is a software application that helps users create personalized workout plans and schedule their exercises. Users can input their fitness goals, such as weight loss, muscle gain, or overall fitness improvement. The app generates a customized plan that includes a variety of exercises targeting different muscle groups. It also provides reminders and notifications to keep users on tra…
Health&Fitness	Fitness Goal Setter	FitnessGoalSetter is a software application that helps users set and track their fitness goals. Users can input their desired fitness goals, such as weight loss, muscle gain, or overall fitness improvement. The software provides a user-friendly interface for goal setting and visual representation of progress. It motivates users through notifications and reminders to stay on track and achieve thei…
Health&Fitness	Health Steps	HealthSteps is a software application that helps users track their daily step count and stay motivated to achieve their fitness goals. The app uses the built-in sensors of a user
Health&Fitness	HealthTrainer	HealthTrainer is a software application that provides personalized fitness training programs and guidance for users based on their specific goals and preferences. Users can track their progress, set reminders, and receive motivational messages to stay on track with their fitness journey.
Health&Fitness	Weight Monitor	WeightMonitor is a software application that helps users track and monitor their weight loss or weight gain goals. Users can input their current weight and desired target weight, and the app will generate a personalized weight loss or weight gain plan. The app provides a progress tracking feature that allows users to monitor their weight changes over time. It also offers recommendations on diet a…
Health&Fitness	Fitness Challenge Tracker	Fitness Challenge Tracker is a software application that allows users to create and participate in fitness challenges to achieve their health and fitness goals...
Health&Fitness	Fitness Challenge Planner	Fitness Challenge Planner is a software application that helps users plan and manage their own fitness challenges. Users can create personalized challenges based on their fitness goals, such as weight loss, muscle gain, or endurance improvement. The app provides a library of challenge templates and allows users to customize the duration, intensity, and specific exercises or activities for each ch…
Health&Fitness	StepCounter	StepCounter is a software application that helps users track their daily step count and encourages them to achieve their fitness goals. The app utilizes the built-in sensors of a user
Health&Fitness	FitnessMentor	FitnessMentor is a software application that provides personalized fitness coaching and guidance to users based on their specific goals and preferences. The app includes a library of exercises with detailed instructions and demonstration videos. Users can input their fitness goals, current fitness level, available equipment, and preferred workout duration. FitnessMentor will then generate a custo…
Health&Fitness	Fitness Buddy	Fitness Buddy is a software application that provides personalized workout plans and tracking for users based on their specific fitness goals and preferences. The app includes a library of exercises with detailed instructions and demonstration videos. Users can input their fitness goals, current fitness level, available equipment, and preferred workout duration. Fitness Buddy will then generate a…
Health&Fitness	FitnessProgress	FitnessProgress is a software application that allows users to track and monitor their fitness progress over time...
Health&Fitness	Daily Water Tracker	DailyWaterTracker is a software application that helps users track and manage their daily water intake.
Health&Fitness	SleepWell	SleepWell is a software application that helps users improve their sleep quality and establish healthy sleep habits. The app includes features such as sleep tracking, bedtime reminders, and relaxation techniques to help users unwind before bed. Users can set personalized sleep goals and monitor their progress over time. SleepWell also provides recommendations based on sleep patterns and offers in…
Health&Fitness	Fitness Game	FitnessGame is a software application that combines fitness exercises with gamification elements to make workouts more engaging and fun...
Health&Fitness	Exercise Planner	The Exercise Planner is a software application that helps users create personalized exercise plans and schedule their workouts. Users can input their fitness goals, such as weight loss, muscle gain, or overall fitness improvement. The app generates a customized plan that includes a variety of exercises targeting different muscle groups. It also provides reminders and notifications to keep users o…
Health&Fitness	Nutrition Helper	NutritionHelper is a software application that helps users track their daily nutritional intake and make informed dietary choices. It allows users to input their meals and snacks, and the software calculates and displays the nutritional information, including calories, macronutrients, and micronutrients for each food item and overall for the day. Users can set goals for their daily nutrient intak…
Language	Language Tutor	Language Tutor is a software application that helps users improve their language skills through interactive exercises and personalized feedback. It provides a wide range of language learning resources, including grammar lessons, vocabulary exercises, and pronunciation practice. The software also offers mini quizzes and tests to assess the user
Language	Language Proficiency Checker	Assess language proficiency through tests and exercises; provide instant feedback and improvement suggestions.
Language	WordMaster	An application to improve vocabulary and enhance language skills
Language	Language Vocabulary Builder	A software to help users expand their foreign language vocabulary through interactive learning, quizzes, and progress tracking.
Language	LanguageSense	LanguageSense is a language learning software designed to enhance vocabulary and grammar skills. It provides interactive exercises with customizable difficulty levels for learners to practice reading, writing, listening, and speaking skills in their target language. The software also offers instant feedback and explanations to help users understand their mistakes and improve their linguistic prof…
Language	Linguistic Analysis Assistant	Analyze the grammatical and syntactic components of a text, including sentence structure, parts of speech, and verb tenses.
Language	Language Learning Tracker	A software application that helps users track their progress in learning a new language. It allows users to set language learning goals, track study time, and keep a record of vocabulary and grammar knowledge. Provides a progress dashboard and reminders.
Language	Language Flashcards	A software that helps language learners improve their vocabulary through flashcards.
Language	Language Mentor	Helps users improve language proficiency through practice exercises and personalized feedback.
Language	Language Translator	Develop a language translation software that allows users to easily translate text between different languages.
Language	Linguistics Analyzer	Analyzes sentences, identifies parts of speech, determines sentence structure, and detects grammatical errors.
Language	Language Pronunciation Coach	A software application to improve pronunciation skills through exercises, real-time feedback, and comparison to native speaker audio.
Language	Language Conversation Partner	Language Conversation Partner is a software application that connects language learners with native speakers of the language they are learning. It provides a platform for users to engage in language exchange conversations through voice and text chat. Users can practice their speaking and listening skills by having conversations with native speakers and receive feedback on their pronunciation and …
Language	Language Vocabulary Game	Language Vocabulary Game is a software application that helps users improve their foreign language vocabulary through interactive games and challenges. It offers a variety of vocabulary exercises, such as word matching, picture labeling, and word association. Users can select their target language and difficulty level, and the software provides instant feedback and score tracking. The software al…
Language	Language Grammar Corrector	Language Grammar Corrector is a software application designed to help users improve their grammar skills in a specific language. It analyzes the grammatical components of a text, such as sentence structure, parts of speech, verb tenses, and identifies grammatical errors. The software provides instant feedback and suggestions to help users correct their grammar mistakes and enhance their linguisti…
Language	Language Synonym Finder	Language Synonym Finder is a software application that helps users improve their language skills by expanding their vocabulary through the discovery of synonyms. Users can enter a word in their target language, and the software will provide a list of synonymous words along with their definitions and example sentences. This tool aims to enhance users
Language	Language Pronunciation Analyzer	The Language Pronunciation Analyzer is a software application that assesses and analyzes an individual
Language	Language Phrasebook Generator	The Language Phrasebook Generator is a software application that generates personalized phrasebooks for language learners based on their proficiency level and learning goals. It provides a wide range of commonly used phrases and expressions in the target language, along with audio pronunciations and contextual examples. Users can customize their phrasebook by selecting specific categories (e.g., …
Language	Language Verb Conjugator	Language Verb Conjugator is a software application that helps language learners practice and improve their verb conjugation skills. It provides a comprehensive database of verbs in various languages along with their conjugation patterns. Users can search for a specific verb and the software will display its conjugations in different tenses, moods, and persons. The conjugations are presented in a …
Language	Language Pronunciation Trainer	Language Pronunciation Trainer is a software application that helps language learners improve their pronunciation skills through targeted exercises and real-time feedback. It provides interactive pronunciation exercises, including tongue twisters, word stress drills, and intonation practice. The software analyzes the user
Language	Language Pronunciation Evaluation	The Language Pronunciation Evaluation is a software application that allows users to assess and improve their pronunciation skills in a specific language. Users can record their voice while reading sentences or phrases in the target language, and the software analyzes their pronunciation accuracy. It provides instant feedback and suggestions for improvement, helping users refine their pronunciati…
Language	Sentence Structure Analyzer	Sentence Structure Analyzer is a software application that helps language learners analyze the grammatical components and sentence structure of a sentence or text in their target language. It identifies the different parts of speech, such as nouns, verbs, adjectives, and adverbs, and displays their relationships within the sentence. The software provides explanations and examples to help users un…
Language	Language Sentiment Analyzer	A software application that analyzes the sentiment of written text in a specific language. It determines whether the sentiment is positive, negative, or neutral, helping language learners understand the emotional context of texts such as articles, reviews, or social media posts.
Language	Language Pronunciation Challenge	Language Pronunciation Challenge is a software application that helps language learners improve their pronunciation skills through a series of targeted challenges and exercises. Users can select their target language and level of difficulty, and the software will provide them with recordings of native speakers pronouncing words and phrases. Users then have to mimic the pronunciation and receive i…
Language	Language Vocabulary Tracker	Language Vocabulary Tracker is a software application that helps users track and improve their vocabulary in a specific language. It allows users to input new words they are learning and provides features such as flashcards, quizzes, and progress tracking. The software aims to enhance users
Language	Language Grammar Quiz	Language Grammar Quiz is a software application that provides users with quizzes to test their grammar skills in a specific language. It offers a variety of multiple-choice and fill-in-the-blank questions that cover different grammatical aspects such as verb tenses, sentence structure, and parts of speech. Users can select their target language and difficulty level, and the software provides imme…
Language	Word Quizzer	WordQuizzer is a language software application that helps users improve their vocabulary skills through interactive quizzes. It provides a database of words in different languages and presents users with multiple-choice questions to test their knowledge. Users can select their target language and difficulty level, and the software provides instant feedback on their answers. The quizzes cover vari…
Language	Language Practice Scheduler	Language Practice Scheduler is a software application that helps users schedule and organize their language practice sessions effectively. It allows users to set specific goals and create personalized study plans based on their availability and learning preferences. Provides reminders, notifications, progress tracking and performance analytics to enhance language proficiency.
Language	Language Spelling Bee	The Language Spelling Bee is a software application that helps users improve their spelling skills in a specific language through interactive exercises and challenges. It provides a database of words in the target language and presents users with spelling quizzes. Users can select their target language and difficulty level, and the software provides instant feedback on their spellings. The quizze…
Language	Language Pronunciation Comparison	Language Pronunciation Comparison is a software application that helps language learners improve their pronunciation skills by comparing their pronunciation to that of native speakers. Users can record their voice while pronouncing words or phrases in the target language, and the software will provide a comparison between their pronunciation and that of a native speaker. This allows users to iden…
Management Game	TeamBuilder	TeamBuilder is a management game software that allows players to create and manage their own virtual sports teams. Players can scout for new talent, train their athletes, and develop strategies to compete against other virtual teams in simulated matches.
Management Game	Business Tycoon	Business Tycoon is a management game software that allows players to become entrepreneurs and build their own business empire. Players start with a small business and must make strategic decisions to expand and optimize their operations. They can hire and manage employees, control production and inventory, set prices, conduct marketing and advertising campaigns, and make financial investments. Th…
Management Game	Employee Efficiency Manager	The software allows players to simulate managing a team of employees, assign tasks, track progress, provide feedback, and implement strategies to optimize overall productivity.
Management Game	FinanceMaster	A Management Game software that simulates financial management in a virtual company, allowing players to make financial decisions, analyze market trends, and manage expenses to ensure profitability and growth.
Management Game	Project Planner	A project planner software designed to help managers effectively plan and organize their projects.
Management Game	Hotel Manager	Hotel Manager is a management game software that allows players to step into the shoes of a hotel manager. Players are responsible for the entire operation of a virtual hotel, from managing bookings to overseeing staff and ensuring guest satisfaction. They must handle various aspects of hotel management, such as room allocation, staff scheduling, inventory management, customer service, and market…
Management Game	Market Master	Market Master is a management game software that allows players to immerse themselves in the world of stock market trading. Players start with a virtual investment portfolio and must make strategic decisions to buy and sell stocks in order to maximize returns. They can analyze market trends, study company financials, and receive news updates to guide their investment decisions. The goal is to bui…
Management Game	Retail Empire	Retail Empire is a management game software that puts players in charge of building and growing their own retail business. Players start with a small storefront and must make strategic decisions to expand their empire. They can choose the types of products to sell, manage inventory, set prices, design and optimize store layout, and conduct marketing campaigns. The goal is to attract customers, in…
Management Game	TimeMaster	TimeMaster is a management game software that allows players to simulate managing their time and tasks effectively. Players can create and organize their schedule, set goals, track progress, and implement strategies to optimize productivity. They can prioritize tasks, allocate time for different activities, set reminders, and receive feedback on their time management practices. The goal is to imp…
Management Game	TeamManager	TeamManager is a management game software that allows players to take on the role of a team manager in a virtual sports organization. Players are responsible for managing all aspects of the team, including player recruitment, training, and match strategies. They can analyze player stats, negotiate contracts, and make tactical decisions during matches to outwit opponents. The software provides a r…
Management Game	League Ruler	League Ruler is a management game software that allows players to take charge of a virtual sports league. Players have the power to create and manage their own league, including selecting teams, scheduling matches, and establishing rules and regulations. They can negotiate contracts with players and coaches, manage finances, and analyze performance statistics. The goal is to grow the league, attr…
Management Game	Project Allocator	Project Allocator is a management game software that allows players to simulate the role of a project manager. Players are responsible for allocating resources, assigning tasks, tracking progress, and making strategic decisions to complete projects within deadlines and budgets. They can analyze project requirements, assign team members with the relevant skills, and prioritize tasks based on depen…
Management Game	Customer Service Guru	Customer Service Guru is a management game software that allows players to step into the role of a customer service manager. Players are responsible for managing the customer service department of a virtual company and ensuring customer satisfaction. They can train and supervise customer service representatives, handle customer inquiries and complaints, develop strategies to improve customer expe…
Management Game	Retail Manager	Retail Manager is a management game software that allows players to take on the role of a retail store manager. Players are responsible for all aspects of running a virtual store, including inventory management, customer service, employee scheduling, and marketing. They must make strategic decisions to attract customers, optimize sales, and achieve profitability.
Management Game	StaffMaster	StaffMaster is a management game software that allows players to simulate managing a workforce within a virtual company. Players are responsible for hiring and training employees, assigning tasks, monitoring performance, and optimizing productivity. They can analyze employee skills, track attendance, provide feedback, and implement strategies to motivate and retain talent. The goal is to build a …
Management Game	City Builder	City Builder is a management game software that allows players to construct and manage their own virtual cities...
Management Game	Hospital Manager	Hospital Manager is a management game software that allows players to step into the role of a hospital administrator. Players are responsible for overseeing all aspects of the hospital
Management Game	TeamRecruiter	TeamRecruiter is a management game software that allows players to take on the role of a talent scout for a virtual sports team. Players are responsible for identifying and recruiting talented players from a pool of virtual athletes. They can analyze player attributes, performance statistics, and potential to make strategic decisions during the recruitment process. The goal is to build a strong t…
Management Game	Hotel Booking Manager	Hotel Booking Manager is a management game software that allows players to manage and optimize the operations of a virtual hotel booking system. Players are responsible for handling bookings, room availability, customer service, and revenue management. They can allocate rooms based on customer preferences, set prices and discounts, manage online and offline bookings, and analyze occupancy rates t…
Management Game	Stock Trading Genius	Stock Trading Genius is a management game software that allows players to immerse themselves in the world of stock market trading. Players start with a virtual investment portfolio and must make strategic decisions to buy and sell stocks in order to maximize returns.
Management Game	Project Planner Lite	Project Planner Lite is a simplified version of the existing Project Planner software. It allows managers to effectively plan and organize their projects by creating tasks, setting deadlines, and tracking progress. Unlike the original software, it does not include advanced features such as resource allocation and budget management.
Management Game	Financial Advisor	The Financial Advisor is a management game software that allows players to take on the role of a financial advisor and guide virtual individuals or companies with their financial decisions. Players can provide advice on investment strategies, retirement planning, budgeting, and risk management. They can analyze market trends, evaluate financial products, and create customized financial plans for …
Management Game	Project Monitor	Project Monitor is a management game software that allows players to simulate the role of a project monitor. Players are responsible for tracking the progress and performance of ongoing projects within a virtual organization. They can monitor project timelines, budgets, and resource allocation to ensure projects are on track and within scope. They can generate reports and charts to visualize proj…
Management Game	SalesForce	SalesForce is a management game software that allows players to step into the role of a sales manager. Players are responsible for managing a virtual sales team and driving business growth. They can recruit and train sales representatives, set sales targets, devise sales strategies, monitor sales performance, and provide feedback to optimize sales outcomes. The goal is to achieve sales targets, i…
Management Game	Restaurant Manager	Restaurant Manager is a management game software that allows players to step into the role of a restaurant manager. Players are responsible for all aspects of running a virtual restaurant, including menu planning, ingredient purchasing, staff hiring and training, customer service, and financial management. They must make strategic decisions to attract customers, optimize operations, and ensure cu…
Management Game	Retail Simulator	Retail Simulator is a management game software that allows players to experience the challenges and rewards of running a virtual retail store. Players start with a small storefront and must make strategic decisions to attract customers and optimize sales. They can choose the types of products to sell, manage inventory, set prices, design and optimize store layout, conduct marketing campaigns, and…
Management Game	FinanceWizard	FinanceWizard is a management game software that allows players to step into the role of a financial manager. Players are tasked with making strategic financial decisions to ensure the profitability and growth of a virtual company. They can analyze financial data, create and manage budgets, make investment decisions, and analyze market trends. The goal is to maximize profits, minimize expenses, a…
Management Game	StaffEfficiency	StaffEfficiency is a management game software that allows players to simulate managing the efficiency of a team of employees. Players are responsible for assigning tasks, tracking progress, providing feedback, and implementing strategies to optimize overall productivity. They can analyze employee performance metrics, identify areas for improvement, and offer training and development opportunities…
Management Game	Inventory Manager	Inventory Manager is a management game software that allows players to take on the role of managing inventory for a virtual company. Players are responsible for optimizing the supply chain, maintaining adequate stock levels, and maximizing efficiency in inventory management processes. They can track inventory levels, analyze demand patterns, forecast sales, and make purchasing decisions to ensure…
Management Game	TeamBuilderX	TeamBuilderX is a management game software that allows players to create and manage virtual sports teams across multiple sports. Players can recruit, train, and trade athletes, develop winning strategies, and compete against other virtual teams in simulated matches. They can also manage team finances, schedule matches, and analyze player performance to maximize success. The goal is to build a str…
Medical	Medical Info Tracker	A software application for tracking and managing medical information, including diagnoses, medications, treatments, and appointment reminders.
Medical	Prescription Reminder	Keep patients on track with their medication schedules by sending timely reminders to take prescribed medications.
Medical	Medical Image Analyzer	A software that uses image processing algorithms to analyze medical images and automatically detect and identify abnormalities. It provides measurements, annotations, and visualizations to assist doctors in diagnosing and monitoring patients. It can also generate detailed reports summarizing the analysis results.
Medical	Medical Appointment Scheduler	This software allows patients to schedule medical appointments with doctors, search based on specialization and location, view available time slots, and book appointments. Reminders are sent to patients about upcoming appointments.
Medical	The Mindful Meditator	The Mindful Meditator is a medical software application that aims to promote mental health and well-being by providing a curated collection of guided meditation sessions. Users can choose from a variety of meditation practices, such as mindfulness, relaxation, and stress reduction. The sessions are designed to be simple and accessible to anyone, regardless of their level of meditation experience.…
Medical	Medical Prescriber Assistant	A software application that assists healthcare professionals in generating accurate and error-free prescriptions for patients. The application would have a user-friendly interface that allows input of patient information, medical history, and prescribed medications. It would then provide suggestions and alerts for potential drug interactions, allergies, and dosing errors, thus reducing the risk o…
Medical	Medical Symptom Checker	The Medical Symptom Checker is a software application that allows users to input their symptoms and receive a list of possible medical conditions or diagnoses related to those symptoms. It provides information on symptoms, causes, and treatments for each condition, and allows users to track their symptoms over time.
Medical	Medical Symptom Tracker	A software application that allows users to track and monitor their symptoms over time, enabling them to identify patterns and potential triggers. Users can log symptoms, severity, duration, and associated factors such as food, stress, or environment to gain insights into their health and make informed decisions.
Medical	Medical Diet Planner	A software application that helps users plan and track their dietary intake based on their medical condition and specific dietary requirements. Provides personalized meal plans, recipe suggestions, and nutritional information.
Medical	Medical Test Result Tracker	A software application for tracking and managing medical test results. Users can input various test results and view comprehensive historical data, trends, and visualizations. The software also offers reminders for follow-up tests and appointments.
Medical	Medical Test Appointment Reminder	A software application that allows healthcare providers to send automated reminders to patients for their upcoming medical tests. The reminders can be sent via SMS or email, providing details about the test, preparation instructions, and the date and time of the appointment.
Medical	Medical Symptom Analyzer	A software application that allows users to input their symptoms and receive an analysis of potential medical conditions or diseases related to those symptoms. The application would use a database of known symptoms and associated conditions to generate a list of possible diagnoses, along with information on causes, treatments, and recommended next steps.
Medical	Medical Exercise Assistant	A software application that provides personalized exercise recommendations and guides for individuals with specific medical conditions or rehabilitation needs. Includes a library of exercises with step-by-step instructions and videos, as well as tracking features to monitor progress and adherence to the exercise program.
Medical	Medical Appointment Reminders Pro	Medical Appointment Reminders Pro is an advanced software application that sends personalized automated reminders to patients for their upcoming medical appointments. It goes beyond the basic functionality of the Medical Appointment Scheduler by providing additional features such as customized reminders based on patients
Medical	Medical Symptom Analyzer Assistant	A software application that combines the functionality of a medical symptom checker and a personal assistant. Users can input their symptoms and receive an analysis of potential medical conditions or diseases related to those symptoms. The application would also provide further guidance on next steps, such as home remedies, self-care tips, or when to seek professional medical help. Additionally, …
Medical	Medical Symptom Severity Tracker	Medical Symptom Severity Tracker is a software application that allows users to track and monitor the severity of their medical symptoms over time. Users can log the intensity or severity of their symptoms on a regular basis and view the data in visualizations to identify trends and changes. The software also provides the option to add notes or additional information related to each symptom entry.
Medical	Medical Records Organizer	A software application that helps healthcare providers and patients organize and manage their medical records digitally. It allows users to input and store all relevant medical information, including diagnoses, lab results, medication history, and treatment plans. Users can easily search and retrieve specific records when needed, reducing reliance on physical copies and improving efficiency in me…
Medical	Medical Symptom Tracker Pro	The Medical Symptom Tracker Pro is a software application that allows users to track and monitor their symptoms over time, providing advanced features for analysis and insights. Users can log their symptoms, severity, duration, and additional factors such as food, stress, or environment. The software utilizes data visualization tools and statistical analysis to help users identify patterns and po…
Medical	Medical Symptom Tracker Lite	A simplified version of the Medical Symptom Tracker software that allows users to track and monitor their symptoms over time. Users can log their symptoms, severity, and duration to gain insights into their health. The software provides basic data visualizations to help users identify patterns and potential triggers. It does not include advanced features for analysis and personalized recommendati…
Medical	Medical Symptom Recommender	A software application that recommends potential medical conditions or diagnoses based on the symptoms provided by the user. It uses a database of known symptoms and associated conditions to generate a list of possible diagnoses, along with information on causes, treatments, and recommended next steps.
Medical	Medical Treatment Tracker	A software application that helps patients track and manage their ongoing medical treatments, including medications, therapies, and procedures.
Medical	Medical Health Tracker	A software application that allows users to track and monitor their overall health and wellness. Users can input various health-related data such as daily activities, exercise routines, sleep patterns, nutrition intake, and stress levels. The software provides visualizations and insights to help users analyze their health trends and make informed decisions to improve their well-being.
Medical	Medical Follow-up Tracker	A software application that helps doctors and healthcare providers track and manage patient follow-up appointments and tests. It allows doctors to input information about each patient
Medical	Medical Symptom Severity Analyzer	A software application that allows users to track and assess the severity of their medical symptoms over time. Users can log their symptoms along with a severity rating on a regular basis, enabling them to monitor changes and trends. The application provides visualizations and reports to help users analyze symptom severity.
Medical	Medical Condition Tracker	A software application that allows users to track and monitor their medical conditions and symptoms over time, providing insights and support for managing their health.
Medical	Medical Condition Tracker Lite	A simplified version of the Medical Condition Tracker software that allows users to track and monitor their medical conditions and symptoms over time. Users can log their symptoms, severity, and duration to gain insights into their health. The software provides basic data visualizations to help users identify patterns and potential triggers, but does not include advanced features for analysis and…
Medical	Medical Symptom Recommender Lite	A simplified version that recommends potential medical conditions or diagnoses based on symptoms provided by the user.
Medical	Medical Symptom Severity Analyser Assistant	Medical Symptom Severity Analyser Assistant tracks and assesses the severity of medical symptoms over time, enabling users to monitor changes and trends in their health.
Medical	Medical Symptom Severity Logger	A software application that allows users to track and log the severity of their medical symptoms over time. Users can input symptoms and rate their severity to monitor changes and trends in their health.
Medical	Medical Patient Recovery Tracker	A software application that helps healthcare providers track and monitor the recovery progress of their patients. It allows providers to input various recovery milestones, such as medication adherence, physical therapy exercises, and follow-up appointments. The software provides visualizations and reports to help providers assess the effectiveness of the treatment plan and make informed decisions…
Music	Music Playlist Generator	Generate personalized playlists based on user preferences and music analysis. Export playlists to preferred music player.
Music	Melody Maker	Melody Maker is a music software application that allows users to easily compose their own melodies. The software provides a user-friendly interface where users can select different musical notes, change their durations, and arrange them in a sequence to create a melody. It also offers a library of pre-set musical styles and instruments to choose from, allowing users to personalize their composit…
Music	Music Tempo Changer	The Music Tempo Changer is a software that allows users to adjust the tempo of their music tracks. Users can input the desired tempo, and the software will modify the track
Music	SoundBoard Master	The SoundBoard Master software allows users to create and manage customizable soundboards. Users can import audio clips or record their own sounds, organize them into categories, and assign hotkeys for quick playback. The software provides a user-friendly interface with drag-and-drop functionality for organizing and editing sound clips.
Music	Echomatic	Echomatic is a music software application that allows users to create echo effects on their music tracks.
Music	PlayList Creator	PlayList Creator is a music software application that allows users to create and customize their own playlists. Users can select their favorite songs from their music libraries and arrange them in a desired order to create personalized playlists. They can also add tags or labels to categorize the playlists based on their mood, genre, or any other criteria. PlayList Creator offers a user-friendly …
Music	Music Note Transcriber	The Music Note Transcriber is a software application that allows users to transcribe musical notes by simply humming or singing them. The application uses advanced audio recognition algorithms to convert the user
Music	Music Harmonizer	The Music Harmonizer is a software application that allows users to harmonize their music tracks effortlessly. Users can upload their existing music files, and the software will automatically analyze the melodies and generate harmonies that complement the original track. It offers options to adjust the harmony level, choose different harmonization styles, and preview the harmonized track in real-…
Music	Lyric Analyzer	The Lyric Analyzer is a music software application that allows users to analyze the lyrics of songs. Users can input the lyrics of a song, and the software will analyze the content, structure, and sentiment of the lyrics. It provides users with detailed insights on the theme, word frequency, rhyme scheme, and emotional tone of the lyrics. Additionally, the Lyric Analyzer offers visualizations and…
Music	Music Genre Analyzer	The Music Genre Analyzer is a software application that analyzes the genre of a music track. Users can input an audio file or provide a link to an online track. The software uses advanced audio analysis techniques to analyze the audio features of the track, including rhythm, melody, and instrumentation. Based on this analysis, it predicts the genre of the track, providing users with a genre class…
Music	Music Scale Explorer	The Music Scale Explorer is a software application that helps musicians and music enthusiasts explore different musical scales and understand their characteristics. Users can select a specific scale from a comprehensive database that includes various scales from different cultural traditions and music genres. The software provides interactive visualizations and audio representations of the select…
Music	Music Chord Progression Generator	Music Chord Progression Generator is a software application that helps musicians and composers generate chord progressions for their compositions. Users can input a musical key and select a desired mood or style, such as happy, sad, or jazz. The software then generates a series of chord progressions that fit the selected key and mood, providing a variety of options for users to choose from. The g…
Music	Music Scale Builder	Music Scale Builder is a software application that allows musicians and music enthusiasts to build and customize their own musical scales. Users can select from a variety of pitch options, such as notes, chords, or intervals, and add them to their customized scale. They can also adjust the octave range, modify the intervals between the pitches, and specify the root note. The software provides a v…
Music	Music Key Signature Finder	The Music Key Signature Finder is a software application that helps musicians and composers determine the key signature of a music piece. Users can input the notes or chords of a section of the music, and the software will analyze the pitch relationships to identify the most likely key signature. It provides a user-friendly interface where users can input the musical elements and view the generat…
Music	Music Rhythm Trainer	The Music Rhythm Trainer is a software application designed to help musicians improve their rhythm skills. Users can select from a variety of rhythm exercises, such as clapping or tapping different patterns. The software provides a metronome to keep a steady beat and visually displays the rhythm patterns for users to follow. It offers a range of difficulty levels and allows users to practice at t…
Music	Music Scale Trainer	MST (Music Scale Trainer) is a software application designed to help musicians and music enthusiasts practice and improve their knowledge of musical scales. It provides interactive exercises where users can identify and play different scales on their instrument of choice. The software offers a variety of difficulty levels, real-time feedback on accuracy, and educational resources with explanation…
Music	Music Beatmaker	Music Beatmaker is a software application that allows users to create their own beats and rhythm patterns. Users can select different drum sounds and arrange them in a sequence to create unique beats. The software provides a user-friendly interface with drag-and-drop functionality for easy beat creation. It also offers features like tempo adjustment, swing control, and quantization to fine-tune t…
Music	Music Note Trainer	The Music Note Trainer is a software application designed to help musicians improve their note recognition skills. Users can select from a variety of exercises, such as identifying individual notes on a staff or identifying intervals between notes. The software provides visual representations of musical notes and a user-friendly interface for users to input their answers. It offers difficulty lev…
Music	Music Loop Creator	The Music Loop Creator is a software application that allows users to easily create and arrange loops of musical patterns. Users can select different instrument sounds and create their own sequences of notes or chords. The software provides a user-friendly interface with a grid-based layout where users can place and rearrange musical patterns to create unique loops. It also offers features like t…
Music	Music Progression Analyzer	The Music Progression Analyzer is a software application that analyzes the chord progressions of music tracks. Users can input a MIDI file or enter the chord progression manually. The software will analyze the chord sequence, identify the individual chords, and provide insights on the harmonic structure. It will also generate visualizations and charts to help users understand the relationships be…
Music	Music Soundwave Visualizer	Music Soundwave Visualizer is a software application that generates real-time visualizations of music soundwaves. Users can select a music file and the software will analyze its audio data to create visual representations of the soundwaves. The visualizations can be customized with various color schemes and styles. Users can also interact with the visualizations by zooming in or out, panning, and…
Music	Music Chord Finder	The Music Chord Finder is a software application that enables musicians and music enthusiasts to effortlessly identify the chords in a given piece of music. By inputting an audio file or providing a link to an online track, users can rely on advanced audio analysis techniques to accurately recognize and display the individual chords. The software offers an intuitive interface, which includes visu…
Music	Music Blendr	Music Blendr is a software application that allows users to easily mix and blend different music tracks together. Users can import multiple audio files and use an intuitive interface to adjust the volume levels, apply crossfades, and synchronize the beats of the tracks. The software also offers features like tempo adjustment and pitch shifting to further enhance the mix. Music Blendr aims to prov…
Music	Music Chord Progression Enhancer	The Music Chord Progression Enhancer is a software application that helps musicians and composers add complexity and depth to their chord progressions. Users can input a basic chord progression and the software will analyze the harmony and suggest additional chords that can be added to create more interesting and unique progressions. The software offers a variety of chord options, including exten…
Music	Music Tempo Adjuster	The Music Tempo Adjuster is a software application that allows users to adjust the tempo of their music tracks. Users can input the desired tempo, and the software will modify the track accordingly, maintaining the pitch and quality of the audio.
Music	Lyrics Analyzer	The Lyrics Analyzer is a music software application that allows users to analyze and gain insights into the lyrics of songs. Users can input the lyrics of a song, and the software will analyze the content, structure, and sentiment of the lyrics. It provides users with detailed insights on the theme, word frequency, rhyme scheme, and emotional tone of the lyrics. Additionally, the Lyrics Analyzer …
Music	Music Scale Generator	Music Scale Generator is a software application that allows users to generate and explore different musical scales. Users can select a root note and choose from a variety of scales, including major, minor, pentatonic, and more. The software will generate the notes of the selected scale and display them visually on a virtual keyboard or musical staff. Users can also listen to how the scale sounds …
Music	Music Tempo Visualizer	Music Tempo Visualizer is a software application that generates real-time visualizations of music tempo. Users can select a music file and the software will analyze its tempo data to create visual representations of the tempo changes throughout the song. The visualizations can be customized with various color schemes and styles. Users can interact with the visualizations by zooming in or out, pan…
Music	Music Mood Analyzer	Music Mood Analyzer is a software application that analyzes the mood and emotional tone of music tracks. Users can input an audio file or provide a link to an online track, and the software will analyze the audio features such as tempo, key, instrumentation, and harmonic structure to determine the mood of the music. It provides users with detailed insights on the mood descriptors such as happy, s…
Music	Harmonic Loop Creator	The Harmonic Loop Creator is a music software application that allows users to easily create and arrange harmonic loops for their compositions. Users can select different chords, specify the duration of each chord, and arrange them in a sequence to create unique harmonic progressions. The software provides a user-friendly interface with drag-and-drop functionality for easy loop creation. It also …
News	News Discovery	A software application that allows users to discover news articles from various sources, providing a user-friendly interface for searching, customization, and staying informed with the latest news.
News	NewsHighlights	NewsHighlights is a news software that provides users with concise summaries of top news stories using natural language processing algorithms. It categorizes news into different topics and allows users to customize their preferences. Users receive personalized daily news digests and can save and share articles.
News	News Insight	News Insight provides users with detailed analytics and insights on news articles, analyzing content, sentiment, and popularity. Users can gain a deeper understanding of news topics, identify emerging trends, and make informed decisions based on the analysis provided.
News	News Viewer	News Viewer is a simple and user-friendly software application that allows users to view and read news articles from various sources.
News	Headline Tracker	A software application that allows users to track the latest headlines from various news sources and receive real-time updates.
News	Daily Digest	The Daily Digest is a news software application that provides users with a curated summary of the most important news stories of the day. Users can customize their preferences and receive a concise digest of the latest news in their chosen categories.
News	NewsHive	NewsHive is a software application that provides a curated collection of news articles from various sources based on user preferences and interests. It allows users to explore the latest news across different categories and topics, providing a personalized news experience. The application also offers features like saving articles for later reading, sharing articles on social media platforms, and …
News	News Trend	News Trend tracks and analyzes the latest trends in news articles, helping users stay informed about the most popular topics.
News	Headlinr	Headlinr is a news software application that provides personalized news summaries. It uses natural language processing techniques to extract key information from news articles and generates concise summaries. Users can customize their news preferences, including topics and sources they are interested in. The software employs a ranking algorithm to prioritize the most relevant news based on user p…
News	Topic Explorer	A news software application that allows users to explore trending topics, search for specific topics, access news articles related to those topics, provide article summaries, source information, publication dates, saving and sharing capabilities.
News	NewsBuzz	Generate personalized news summaries based on user preferences.
News	Trending Topics	A software application that tracks and displays the current trending topics and news articles across various social media platforms, allowing users to stay updated with the latest trends.
News	NewsMeter	Evaluate the credibility of news articles by analyzing multiple factors and generating trustworthiness scores with explanations and evidence.
News	InstantNews	InstantNews is a news software application that provides real-time updates on breaking news from around the world. It combines curated news sources with algorithms to deliver tailored news summaries. Users can skim through headlines and read articles of interest. Features include bookmarking and sharing functionalities.
News	SmartNews	SmartNews is a news software application that provides personalized news recommendations based on user preferences. It uses a machine learning algorithm to analyze the user
News	NewsWatch	NewsWatch is a personalized news application that curates a tailored news feed for users based on their preferences and trending topics. It includes bookmarking and sharing features, allowing users to save articles and share them with their network.
News	News Scope	News Scope is a news exploration application that allows users to search, browse, and discover news articles from various sources. It offers personalized recommendations, saving, and sharing features.
News	News Finder	A software application that allows users to search for and discover news articles based on their interests. It provides a list of relevant articles with brief summaries, allows users to read the full content, save articles, share them on social media, and bookmark favorite sources.
News	NewsFlash	NewsFlash is a news software application that provides users with real-time updates on breaking news stories. It delivers concise and accurate news summaries, ensuring users can stay informed in a fast and efficient manner. The app categorizes news stories based on different topics, such as politics, business, technology, etc., allowing users to personalize their news feed according to their inte…
News	NewsFlix	A news software application that provides personalized news recommendations based on user preferences and interests. It allows users to customize their news feed by selecting topics of interest and filters out irrelevant news sources. The application also provides a search feature for users to find specific news articles or topics. Users can save articles to read later and share articles with oth…
News	News Reader	News Reader is a software application that allows users to read and stay updated on the latest news articles from various sources. It provides a clean and user-friendly interface where users can browse different categories of news such as politics, sports, entertainment, etc. Users can also search for specific topics or keywords to find relevant articles. News Reader offers a personalized experie…
News	News Alert	A software that delivers personalized news alerts to the user based on their selected preferences.
News	NewsFocus	A software application that allows users to personalize their news consumption by selecting specific topics of interest. The application provides a curated selection of news articles, videos, and podcasts based on the user
News	IntelliNews	A news software application that uses NLP algorithms to summarize and categorize news articles, providing concise summaries and categorization by topics.
News	Trend Analysis	Trend Analysis is a news software application that tracks and analyzes the latest trends in news articles, helping users stay informed about the most popular topics. It provides real-time updates on trending news topics across various categories, such as politics, sports, entertainment, technology, etc. Users can browse through trending articles, view detailed insights on popularity and sentiment…
News	NewsBot	NewsBot is a news software application that provides personalized news recommendations and updates through a conversational chatbot interface. Users can interact with the chatbot to receive news summaries, explore different topics, and ask specific questions about news articles. The chatbot uses natural language processing algorithms to understand user queries and generate relevant responses, ens…
News	Headline Trends	Headline Trends is a News software application that provides users with real-time updates on the latest trending news headlines across various categories. It utilizes advanced algorithms to track and analyze the popularity and sentiment of news articles, enabling users to stay informed about the most talked-about topics. The software offers a user-friendly interface where users can browse through…
News	NewsTrackr	NewsTrackr is a news software application that allows users to track and organize news articles from various sources. Users can create personalized news trackers that automatically collect news articles based on specific keywords, topics, or sources of interest. The software provides a user-friendly interface for managing and organizing news trackers, enabling users to stay informed on the latest…
News	NewsFlash+	NewsFlash+ is a news software application that provides real-time updates on breaking news stories. It delivers concise and accurate news summaries, ensuring users can stay informed in a fast and efficient manner. The app categorizes news stories based on different topics, such as politics, business, technology, etc., allowing users to personalize their news feed according to their interests. New…
News	NewsSummarizer Plus	NewsSummarizer Plus is a news software application that provides users with concise and personalized summaries of news articles. It utilizes natural language processing algorithms to analyze the content of news articles and generate summaries that capture the key information. Users can customize their preferences and select their preferred news topics and sources. The application also offers feat…
Notebook	Notebook Organizer	Create a software application that allows users to create and manage digital notebooks. Users can organize notes, ideas, tasks, set reminders, and perform searches within the notebooks.
Notebook	NoteCollab	Collaborative notebook allowing real-time editing, note organization, version control, commenting, and file attachments.
Notebook	Sticky Notes	A software that allows users to create digital sticky notes on their computer screen to jot down quick reminders, to-do lists, or important information.
Notebook	Notebook Assistant	A software designed to enhance note-taking and organization by providing features like note creation, categorization, tagging, search capabilities, and reminders. It aims to streamline the note-taking process and improve productivity.
Notebook	NoteGraph	NoteGraph is a software application that allows users to create visual mind maps and graphs to organize their thoughts, ideas, and notes. Users can create nodes representing different concepts and connect them with labeled arrows to show relationships and dependencies. They can also add text, images, and colors to customize the appearance of the graph. NoteGraph provides dragging and rearranging …
Notebook	NoteFlow	NoteFlow is a software application that provides a seamless and intuitive note-taking experience. It allows users to create and organize notes in a visually appealing and dynamic interface. Users can customize the appearance of their notes by choosing from various templates, colors, and fonts. NoteFlow also offers a unique feature called "flow mode" where users can link related notes together to …
Notebook	NoteLink	NoteLink is a software application that revolutionizes note-taking by introducing a dynamic linking feature.
Notebook	NoteSync	NoteSync is a software application that allows users to synchronize their digital notebooks across multiple devices. Users can create, organize, and edit their notes on one device, and the changes will automatically sync to their other devices in real-time.
Notebook	NoteHub	NoteHub is a notebook software application designed for software developers and coders. It provides a platform for developers to create, store, and organize their programming notes, snippets, and code examples. NoteHub offers syntax highlighting for various programming languages, a code editor with features like auto-indentation, code completion, and search functionality within notes. It also all…
Notebook	NoteArchiver	NoteArchiver is a software application that helps users organize and archive their digital notebooks. It allows users to selectively choose notebooks or specific notes within a notebook to be archived. Archived notes are securely stored and can be easily accessed or restored when needed. Users can also add tags or labels to archived notes for efficient search and retrieval. NoteArchiver provides …
Notebook	NoteShare	NoteShare is a software application that allows users to easily share their digital notebooks with others. Users can create and organize their own notebooks with notes, ideas, and tasks, and then choose specific notebooks or individual notes to share with collaborators. The shared notebooks can be accessed by collaborators in read-only mode or with editing privileges, allowing for real-time colla…
Notebook	NoteConnect	NoteConnect is a software application that enables users to connect and link related notes within their digital notebooks. Users can establish connections between different notes based on their relevance, dependencies, or associations. These connections can be visualized through a network-like interface, allowing users to easily navigate between linked notes and explore the connections between di…
Notebook	NotePlan	NotePlan is a notebook software application that combines note-taking and planning features. Users can create and organize notes, tasks, and events in a seamless and intuitive interface. NotePlan allows users to schedule tasks and events directly within their notes, with the ability to set reminders and due dates. It also offers a calendar view that displays the scheduled events and tasks for bet…
Notebook	NotePalette	A software application that allows users to create and organize digital notebooks specifically designed for color palettes. Users can create new palettes by selecting colors from a color picker or by importing colors from images. They can also organize their palettes into categories such as warm colors, cool colors, pastel colors, etc. NotePalette provides tools to easily rearrange, delete, or du…
Notebook	Notebook Linker	A software application that facilitates linking and connecting related notes within digital notebooks. Users can establish connections based on relevance, dependencies, or associations, enabling easy navigation and exploration of connections between ideas.
Notebook	Notebook Sketch	Notebook Sketch is a software application that allows users to create digital notebooks specifically designed for sketching and drawing. Users can create new pages within the notebook and use a variety of drawing tools, such as pencils, brushes, and colors, to sketch or draw their ideas, designs, or illustrations. They can also annotate their sketches with text and add labels or tags for easy org…
Notebook	Notebook Sketchify	Notebook Sketchify is a software application that allows users to create digital notebooks specifically designed for sketching, drawing, and annotating their ideas. Users can create new pages within the notebook and use a variety of drawing tools, such as pencils, brushes, and colors, to sketch or draw their concepts, designs, or illustrations. They can also annotate their sketches with text, add…
Notebook	Notebook Focus	Notebook Focus is a software application that helps users stay focused and organized while taking digital notes. It offers a distraction-free environment with minimalistic features to eliminate unnecessary clutter. Users can create and manage their notes, categorize them with tags, and easily search for specific notes. Notebook Focus also provides a Pomodoro timer feature, allowing users to set i…
Notebook	Notebook Highlighter	A software application that allows users to highlight and annotate digital notebooks. Users can select text or sections of their notes and apply different colors to highlight important information. They can also add annotations or comments to the highlighted sections for further clarification or context. The software provides a simple and intuitive interface for easy highlighting and annotation.
Notebook	Notebook Planner	A software application that combines note-taking and planner features to help users stay organized and manage their tasks effectively. Users can create and organize notes, set reminders, and schedule tasks and events within their notebooks. The software provides a calendar view to visualize the scheduled events and tasks and allows users to easily switch between the note-taking and planning modes…
Notebook	Notebook SketchPro	Notebook SketchPro is a software application that enables users to create and organize digital notebooks specifically designed for sketching, drawing, and annotating their ideas. Users can create new pages within the notebook and use a variety of advanced drawing tools, such as brushes, pens, and markers, to create detailed and professional-level sketches. They can also annotate their sketches wi…
Notebook	NoteSync+	NoteSync+ is a notebook software application that enables users to sync their digital notebooks seamlessly across multiple devices. Users can create, organize, and edit their notes on one device, and the changes will automatically sync to their other devices in real-time. NoteSync+ also offers collaboration features, allowing users to invite others to edit and contribute to their notebooks. Addit…
Notebook	NoteBot	NoteBot is a notebook software application designed specifically for students to enhance their note-taking experience. It offers features such as note creation, categorization, tagging, search capabilities, and reminders, similar to Notebook Assistant. Additionally, NoteBot incorporates a smart summarization feature that uses natural language processing techniques to generate concise summaries of…
Notebook	Notebook Sketcher	Notebook Sketcher is a software application that allows users to create digital notebooks specifically designed for sketching and drawing. Users can create new pages within the notebook and use a variety of drawing tools, such as pencils, brushes, and colors, to sketch or draw their ideas, designs, or illustrations. They can also annotate their sketches with text and add labels or tags for easy o…
Notebook	Notebook PlannerPro	Notebook PlannerPro is a software application that combines note-taking and planner features to help users stay organized and manage their tasks effectively. Users can create and organize notes, set reminders, schedule tasks and events, and track their progress. The software provides a calendar view to visualize the scheduled events and tasks, offers customizable templates for note-taking and pla…
Notebook	NotebookChat	NotebookChat is a software application that combines note-taking and instant messaging features. Users can create digital notebooks to jot down their thoughts, ideas, and tasks. They can also invite friends or colleagues to collaborate within the notebooks and have real-time conversations while taking notes. NotebookChat provides a chat interface alongside the note-taking interface, allowing user…
Notebook	NoteCard	NoteCard is a notebook software application that allows users to create digital flashcards for studying and memorization purposes. Users can create individual note cards with a front side containing a question or a prompt, and a back side with the corresponding answer. They can organize these note cards into decks based on subjects or topics. NoteCard provides features like shuffling cards, flipp…
Notebook	NoteCloud	NoteCloud is a notebook software application that allows users to create, organize, and access their digital notebooks across multiple devices using cloud storage. Users can create and manage notebooks, as well as add and edit notes within each notebook. The software automatically syncs the changes made in real-time, ensuring that users can access their updated notes from any device. NoteCloud al…
Notebook	NotePlus	NotePlus is a notebook software application that combines note-taking with a built-in task management system. Users can create and organize notes, set deadlines for tasks, and prioritize them within the app. The software also provides options to categorize notes, add tags, and perform searches to quickly find specific information. NotePlus aims to streamline the process of taking notes and managi…
Notebook	NotebookMind	NotebookMind is a software application that provides users with a platform to create and organize digital notebooks specifically designed for brainstorming and creative ideation. Users can create new pages within the notebook and use various brainstorming tools such as mind maps, flowcharts, and visual diagrams to capture and organize their ideas. NotebookMind also offers features like color codi…
Office	Office Data Analyzer	Analyze and visualize data from various office applications, providing features for filtering, sorting, and creating custom charts and graphs. Export the analyzed data and visualizations in various formats.
Office	TaskTime	TaskTime is a time management software designed to help users efficiently track and organize their daily tasks...
Office	Document Tracker	A software to track the status of documents within an office
Office	Office Spaces	Office Spaces is a software that allows employees to find and book available workspaces within an office building. It provides a user-friendly interface to view the floor plan, check workspace availability, and book them for a specific time period. Special requirements can also be added to bookings. Office Spaces simplifies the workspace booking process for employees, enhancing office management …
Office	CollabNote	Collaborative note-taking software allowing real-time collaboration, note creation, organization, text formatting, image and link integration, tagging, categorization, chat, and file sharing.
Office	Office Organizer	The Office Organizer is a software that helps users manage and organize their office supplies and equipment. It provides a comprehensive inventory system where users can input and track details of items such as stationery, electronics, furniture, etc. The software allows users to add new items, update quantities, record maintenance and repair history, and set reminders for restocking or replaceme…
Office	Office Chat	Office Chat is a software application that provides a real-time communication platform for employees within an office. It allows users to send messages, share files, and collaborate on projects. The software includes features such as individual and group chats, file sharing, message search, and notification settings.
Office	Office Meeting Scheduler	Office Meeting Scheduler is a software that simplifies the process of scheduling and managing office meetings...
Office	Office Stock Manager	A software that helps office administrators and managers keep track of stock levels and manage office supplies efficiently. Users can input details of various items like stationery, electronics, furniture, etc. The software provides features for adding new items, updating stock quantities, and setting reminders for restocking or replacing items. It also includes a search functionality to easily r…
Office	Office Document Generator	A software application that allows users to generate various types of office documents such as letters, memos, reports, and presentations. It provides templates, formatting options, and a user-friendly interface to input content and customize the document layout. Users can easily add and edit text, insert images and tables, and apply styles and formatting to create professional and visually appea…
Office	Office Deadline Reminder	The Office Deadline Reminder is a software that helps users manage and track deadlines for various office tasks and projects. It provides a centralized platform where users can input and organize tasks, set deadlines, and receive reminders for upcoming deadlines.
Office	Office Expense Tracker	A software to track and manage office expenses, including inputting expenses, categorization, budgeting, generating reports, and analyzing expenditure patterns to identify cost-saving opportunities.
Office	Office Space Booking Tracker	Office Space Booking Tracker is a software designed to help employees track and manage the availability and bookings of different workspaces within an office building. It provides a user-friendly interface where employees can view the floor plan, check the availability of workspaces, and make bookings for specific time periods. The software also allows employees to add special requirements or pre…
Office	Office Vacation Request Manager	A software application designed to simplify and streamline the process of managing employee vacation requests within an office. It provides a centralized platform for employees to submit vacation requests, which are then automatically processed and tracked by the software. Managers can view and approve/reject vacation requests, and employees can easily check the status of their requests. The soft…
Office	Office File Converter	A software application that allows users to convert different types of office files into various formats. It supports file formats such as documents (e.g., DOCX, PDF), spreadsheets (e.g., XLSX, CSV), presentations (e.g., PPTX, PDF), and images. Users can simply upload their files, select the desired output format, and initiate the conversion process. The software provides a user-friendly interfac…
Office	Office Space Utilizer	A software that helps offices optimize their workspace utilization by analyzing occupancy data and providing insights on how to efficiently allocate and manage office space.
Office	Office Employee Feedback	Office Employee Feedback is a software application designed to collect and manage feedback from employees within an office. It provides a platform for employees to share their thoughts, suggestions, and concerns anonymously or openly. The software includes features such as feedback submission, categorization, and tracking. Managers and HR personnel can easily review, analyze, and respond to the f…
Office	Office Meeting Minutes Recorder	The Office Meeting Minutes Recorder is a software that helps users record and document meeting minutes during office meetings. It provides a user-friendly interface for inputting meeting details, attendees, agenda, and discussion points. The software can record meeting audio or allow users to add written notes. It also includes features for organizing and categorizing previous meeting minutes for…
Office	Office Vehicle Scheduler	A software that helps manage and schedule office vehicles, including tracking availability, booking vehicles for specific time periods, and managing maintenance and servicing.
Office	Office Meeting Room Scheduler	The Office Meeting Room Scheduler is a software designed to simplify the process of scheduling and managing meeting rooms within an office building...
Office	Office Task Tracker	The Office Task Tracker is a software designed to help users efficiently track and manage their tasks within an office setting. It provides a user-friendly interface for creating and organizing tasks, setting deadlines, assigning priority levels, and tracking progress. Users can easily add new tasks, update task details, and mark tasks as complete. The software also includes features such as task…
Office	Office Event Planner	A software application that helps users plan and organize office events such as team building activities, workshops, and parties. It provides a user-friendly interface for creating event details, setting budgets, creating task lists, and managing event logistics. Users can easily invite attendees, track RSVPs, and send event reminders. The software also includes features such as event calendar in…
Office	Office Workload Balancer	The Office Workload Balancer is a software application designed to optimize and distribute workload among employees within an office. It provides a user-friendly interface where managers can assign tasks and projects to employees based on their expertise, availability, and workload. The software includes features for tracking task progress, generating workload reports, and ensuring that workload …
Office	Office Employee Task Allocator	Office Employee Task Allocator is a software application that helps managers efficiently allocate tasks among employees within an office. It provides a user-friendly interface where managers can input task details, assign tasks to employees based on their skills and workload, and track task progress. The software includes features for generating task reports, setting task deadlines, and ensuring …
Office	Office Task Feedback Tracker	A software that allows employees to provide feedback on tasks assigned to them within an office setting. This software provides a platform for employees to share their thoughts, suggestions, and concerns regarding specific tasks. It facilitates feedback submission, categorization, and tracking, enabling managers to review and address employee feedback effectively.
Office	Office Meeting Feedback Manager	A software application that allows employees to provide feedback on office meetings, enabling managers to assess the effectiveness of their meetings and make improvements.
Office	Office Event RSVP Tracker	The Office Event RSVP Tracker is a software designed to help event organizers efficiently track and manage RSVPs for office events. It provides a user-friendly interface for creating event invitations, tracking attendee responses, and managing event logistics. Users can easily send invitations, track RSVPs, and send event reminders. The software also includes features such as event calendar integ…
Office	Office Task Efficiency Tracker	Office Task Efficiency Tracker is a software application that helps users track and analyze their task productivity and efficiency in an office setting. It provides features for users to input and categorize their tasks, set deadlines, record time spent on tasks, and track task completion. The software generates reports and visualizations to show task progress, time allocation, and overall effici…
Office	Office Expense Tracker Plus	Office Expense Tracker Plus is a software application designed to track and manage office expenses efficiently. It provides features for inputting expenses, categorizing them, setting budgets, generating reports, and analyzing expenditure patterns to identify cost-saving opportunities. Additionally, it includes features such as receipt scanning and integration with accounting software for seamles…
Office	Office Project Tracker	OPT is a software application that helps teams efficiently manage and track their office projects...
Personalisation	RecommendationMate	A software that recommends personalized movie recommendations based on user preferences and historical data.
Personalisation	Personalized Health Tracker	A software application that allows users to track and monitor their health goals and progress. Users can input their personal health data such as weight, height, daily activity levels, and nutrition intake. The application generates personalized recommendations based on the user
Personalisation	Smart Saver	A personal finance management software that helps users track expenses and provides personalized recommendations on saving money.
Personalisation	Personalization Manager	Personalization Manager is a software that allows users to customize the look and feel of their digital devices. It provides a simplified interface where users can easily personalize their desktop wallpapers, screen savers, icon sets, and color schemes. The software also offers a library of pre-designed themes and allows users to create and save their own customized themes.
Personalisation	Personal Profile Generator	The Personal Profile Generator is a software that allows users to quickly and easily create personalized profiles...
Personalisation	DAW: Dynamic Wallpaper	Personalize your device with dynamic wallpapers that can change based on time of day or user-defined events. Choose from a collection of animated, live, or custom wallpapers to create a unique and interactive experience for your device.
Personalisation	CustomFit	CustomFit is a personalization software that allows users to create and manage personalized workout plans based on their individual fitness goals and preferences. Users can input information such as their current fitness level, target goals, preferred exercises, and time availability. The software then generates a tailored workout plan, including exercise routines, rest days, and progress trackin…
Personalisation	Fashion Fusion	Fashion Fusion is a personalization software application that helps users create unique and stylish outfits based on their existing wardrobe. It analyzes the user
Personalisation	SmartRemind	SmartRemind is a personalization software that helps users manage and prioritize their daily tasks and appointments. It uses algorithms to analyze the user
Personalisation	PersonalizationOptimizer	PersonalizationOptimizer is a software application that helps users optimize the personalized settings on their digital devices. It analyzes the user
Personalisation	MovieMatcher	MovieMatcher is a personalization software application that helps users discover movies based on their individual preferences and interests. Users can input their favorite genres, actors, directors, and plot keywords, and the software will generate personalized recommendations that align with their movie preferences.
Personalisation	Personal Music Mixer	The Personal Music Mixer is a software that allows users to create personalized playlists by blending songs from their existing music library. Users can adjust volume levels, crossfade between songs, and add fade-in and fade-out effects. They can save and share their customized mixes.
Personalisation	TimeTracker	TimeTracker is a personalization software application that helps users manage and optimize their time. It allows users to input their daily tasks, appointments, and deadlines, and provides personalized recommendations and reminders to help users stay organized and meet their goals. The software analyzes the user
Personalisation	Personal Recipe Assistant	A software application that helps users personalize their recipes based on their dietary preferences, food restrictions, and flavor preferences. Users can input their dietary restrictions, such as vegetarian, gluten-free, or lactose intolerant, and the software will generate personalized recipe recommendations. It also allows users to customize recipes by adjusting ingredient quantities and subst…
Personalisation	Personalized Habit Tracker	A software application that helps users track and monitor their daily habits and provides personalized recommendations for habit formation and improvement.
Personalisation	Mindful Meditation	MindfulMeditation is a personalisation software that helps users practice mindfulness and meditation. It provides a library of guided meditation sessions that are tailored to individual preferences and needs. Users can choose from different meditation styles, durations, and themes to create a personalised meditation experience. The software also offers features like progress tracking and reminder…
Personalisation	Daily Routine Tracker	A personalization software application that helps users track and optimize their daily routines and habits. Users can input their routines and the software provides personalized recommendations for improvements to help users optimize their daily schedules. The software also offers features like progress tracking and reminders to help users stay consistent with their routines.
Personalisation	Personal Goal Setter	A personalization software application that helps users set and track their personal goals. Users can input their goals, such as fitness, career, or personal development, and the software provides personalized recommendations and progress tracking. It also offers features like reminders and notifications to help users stay motivated and on track with their goals.
Personalisation	FitnessBuddy	FitnessBuddy is a personalization software application that provides users with personalized workout and nutrition plans to help them achieve their fitness goals. The software analyzes the user
Personalisation	Personal Cooking Coach	A software application that provides personalized cooking guidance and recommendations based on individual preferences and dietary restrictions. Users can input their dietary preferences, such as vegetarian, vegan, or gluten-free, and the software will generate personalized recipe suggestions and cooking tips. It also offers features like meal planning, grocery list generation, and nutritional in…
Personalisation	EventPlanner	EventPlanner is a personalization software application that helps users plan and organize events such as parties, conferences, or weddings. Users can input their event details, including the type of event, guest count, budget, preferred date and venue, and any specific requirements or preferences. The software then generates personalized recommendations for event vendors, such as caterers, photog…
Personalisation	TimeOptimizer	A personalization software application that helps users optimize their time and increase productivity. It analyzes the user
Personalisation	Personalized Music Discovery	Personalized Music Discovery is a software application that helps users discover new music based on their individual preferences and interests. It analyzes the user
Personalisation	MoodMaker	MoodMaker is a personalization software application that helps users create personalized playlists based on their current mood. Users can select their current mood or emotions from a predefined list or input their own. The software then generates a customized playlist that aligns with their mood, selecting songs with similar tempo, lyrics, or genre. It also allows users to save and share their pe…
Personalisation	Personalized Travel Planner	A software application that helps users plan personalized travel itineraries based on their preferences and interests.
Personalisation	Personal Happiness Tracker	The Personal Happiness Tracker is a software application that helps users track and monitor their happiness levels on a daily basis. Users can input their mood, activities, and any significant events throughout the day. The software generates personalized recommendations based on the user
Personalisation	WellnessTracker	WellnessTracker is a personalization software application that helps users track and monitor their overall wellness and provides personalized recommendations for improving their well-being. Users can input various aspects of their wellness, such as physical activity, sleep quality, nutrition, stress levels, and mental health. The software analyzes the user
Personalisation	TravelCompanion	A personalization software application that helps users plan personalized travel itineraries based on their preferences and interests.
Personalisation	Personal Music Coach	The Personal Music Coach is a software application that provides personalized feedback and guidance to help users improve their musical skills. Users can input their instrument of choice and their current skill level. The software analyzes their performance and provides targeted recommendations for practice exercises, technique improvement, and repertoire selection. It also offers features like p…
Personalisation	Personalized Sleep Tracker	A software application that helps users track and optimize their sleep patterns based on their individual preferences and sleep goals. Users can input their sleep schedule, sleep quality, and any factors that affect their sleep, such as caffeine intake or exercise. The software generates personalized recommendations for improving sleep quality and provides insights into sleep patterns.
Photo	Photo Sticker Maker	A software that allows users to create customized stickers using their own photos. Users can select an image, choose the desired shape and size of the sticker, and add text or decorative elements. The software provides easy-to-use tools for cropping, resizing, and adding effects to the photos. Once the sticker is created, users can save it as a transparent PNG file to use in messaging apps or soc…
Photo	Image Enhancer	A photo software application for enhancing the quality and appearance of images. It provides a range of editing tools, including brightness, contrast, and saturation adjustment, along with filters and effects to enhance colors and tones. Users can also perform basic cropping and resizing. The software aims to provide a simple yet powerful tool to enhance and improve photos.
Photo	AutoCrop	AutoCrop is a photo software application that automatically detects and crops the main subject in an image.
Photo	Photo Collage Creator	A software that allows users to create personalized photo collages by combining multiple images into a single composition. Users can select images from their gallery and arrange them in different layouts, such as grids or freeform. The software provides tools for resizing, rotating, and adding borders to the images, as well as options for adjusting the spacing and background color of the collage.…
Photo	Photo Caption Generator	A software application that automatically generates captions for photos based on their content.
Photo	Photo Background Remover	A software application that allows users to easily remove the background from their photos. Users can select an image and using advanced algorithms, the software intelligently removes the background, preserving the main subject with accuracy. It provides tools to refine the selection and make adjustments if needed. Once the background is removed, users can save the image with a transparent backgr…
Photo	Blur Image Editor	A software that allows users to easily blur specific areas in their photos. Users can select an image and use the software
Photo	Photo Framing Software	A software that allows users to add decorative frames to their photos. Users can select an image and choose from a variety of frame styles, including classic, modern, and artistic designs. The software provides tools for adjusting the size and position of the frame, as well as options for adding borders or effects. Once the framing is complete, users can save the image with the framed design.
Photo	Color Harmonizer	The Color Harmonizer software is a simple yet powerful tool for generating color schemes from images...
Photo	Photo Background Changer	A software application that allows users to easily change the background of their photos. Users can select an image and choose a new background image or color. The software intelligently removes the existing background and replaces it with the new one, preserving the main subject with accuracy. It provides tools to refine the selection and make adjustments if needed. Once the background is change…
Photo	Photo Quote Creator	A software application that allows users to create visually appealing quote images using their own photos. Users can select an image as the background, choose from a variety of pre-designed templates, and add text quotes with customizable fonts, colors, and sizes. The software provides tools for positioning and resizing the text, as well as options for adding decorative elements like shapes and i…
Photo	Photo Defogger	A software that enhances the visibility of photos taken in foggy or hazy conditions. It uses intelligent algorithms to reduce the effects of fog or haze and improve the clarity of the image. Users can adjust the strength of the defogging effect and save the enhanced photo in high resolution.
Photo	Photo Background Eraser	The Photo Background Eraser is a software that allows users to easily remove the background from their photos by selecting and erasing the unwanted areas. Users can choose an image, use advanced algorithms to intelligently remove the background, and refine the selection if needed. Once the background is removed, users can save the image with a transparent background or replace it with a new backg…
Photo	Photo Color Palette Generator	A software application that generates color palettes based on the colors found in a photo. Users can select an image, and the software will analyze the colors present, extracting the dominant hues and generating a complementary color palette. The color palettes can be used for various purposes such as designing websites, creating artwork, or selecting color schemes for projects.
Photo	Photo Filterizer	Photo Filterizer is a photo software application that allows users to apply various filters and effects to their photos. Users can choose an image and select from a wide range of filters, such as black and white, vintage, sepia, or artistic styles. The software provides tools for adjusting the intensity of the filters and previewing the changes in real-time. Once the desired filter is applied, us…
Photo	Photo Collage Frame Maker	A software that allows users to create personalized photo collages with decorative frames. Users can select multiple images from their gallery and arrange them in different layouts, such as grids or freeform. The software provides a collection of decorative frames to choose from and allows users to easily resize and position the frames. Once the collage with frames is complete, users can save it …
Photo	Photo Background Pattern Maker	A software that allows users to create unique and personalized background patterns for their photos. Users can select an image as the base, choose from a variety of pattern styles, and customize the color, size, and opacity of the pattern. The software provides tools for positioning and repeating the pattern, as well as options for adding additional elements like shapes or textures. Once the back…
Photo	Color Palette Picker	Color Palette Picker is a photo software application that allows users to generate color palettes based on the colors found in a photo. Users can choose an image, and the software will analyze the colors present, extracting the dominant hues and generating a complementary color palette. The color palettes can be used for various purposes such as designing websites, creating artwork, or selecting …
Photo	Custom Filter Creator	A software that allows users to create custom filters for photos. Users can select an image, adjust various parameters such as brightness, contrast, saturation, and apply effects like blur or sharpen. The software provides a simple interface where users can modify these settings and instantly see the changes applied to the image. Once the desired filter is created, users can save it and apply it …
Photo	Panorama Stitcher	The Panorama Stitcher is a photo software application that allows users to stitch multiple photos together to create a panoramic image. Users can select a series of photos taken from the same vantage point and the software will automatically align and blend them to create a seamless panorama. The software provides tools to adjust the perspective, crop the image, and enhance the colors and tones. …
Photo	Background Blur Editor	A software that allows users to easily blur the background of their photos. Users can select an image and use the software
Photo	Photo Focus Enhancer	A software that allows users to enhance the focus and sharpness of their photos. Users can select an image and use advanced algorithms that automatically analyze and adjust the focus, making the subject appear clearer and more defined. The software provides tools to adjust the intensity of the enhancement and preview the changes in real-time. Once the focus is enhanced to the desired level, users…
Photo	Photo Filter Organizer	A software application that allows users to organize and categorize their photo filters. Users can import their collection of filters and create custom categories to group them based on themes or styles. The software provides tools for adding descriptions and tags to the filters, as well as options for searching and filtering the filters based on their properties. Users can easily access and appl…
Photo	Photo Duplicate Finder	A software that scans and identifies duplicate photos in a user
Photo	Photo Retouching Assistant	A software that automates and simplifies the process of retouching photos by providing a set of intelligent tools to remove blemishes, smooth skin, whiten teeth, and enhance overall image quality.
Photo	Photo Filter Mixer	A software application that allows users to combine and mix multiple filters to create unique and customized effects for their photos. Users can select an image and choose from a variety of pre-designed filters. The software provides tools for adjusting the intensity and applying multiple filters simultaneously. Users can also create their own custom filters by modifying the parameters and saving…
Photo	Photo Frame Organizer	A software that allows users to organize and categorize their collection of photo frames. Users can import their own frames or choose from a library of pre-designed frames. They can create custom categories to group frames based on themes or styles. The software provides tools for adding descriptions and tags to the frames, as well as options for searching and filtering the frames based on their …
Photo	Photo Collage Layout Maker	A software that allows users to create custom collage layouts for their photos. Users can select multiple images from their gallery and choose from a variety of pre-designed layout templates or create their own custom layouts. The software provides tools for adjusting the size and position of the photos within the layout, as well as options for adding borders or effects. Once the collage layout i…
Photo	Photo Layout Designer	A software application that allows users to create custom layouts for their photos. Users can select multiple images and arrange them in different layouts, adjusting size, position, and adding borders and frames to create unique compositions. Once the layout is complete, users can save it as a high-resolution image file.
Photo	Photo Mosaic Maker	A software that allows users to create unique photo mosaics by combining multiple small images to form a larger image. Users can select a main image and a collection of smaller images, and the software will automatically arrange and resize the smaller images to fit into the main image, creating a stunning mosaic effect. The software provides tools for adjusting the size and position of the smalle…
Puzzle Game	Word Link Puzzle	A puzzle game where players have to connect letters to form words.
Puzzle Game	Jigsaw Mania	Jigsaw Mania is a puzzle game software that allows users to solve virtual jigsaw puzzles. Users can choose from a variety of puzzle images and difficulty levels. They can drag and drop the puzzle pieces to complete the picture. The software provides a timer to keep track of solving time and allows users to save their progress. It also includes features like hints, puzzle rotation, and the ability…
Puzzle Game	Block Connect	Block Connect is a puzzle game where players have to connect blocks of the same color to clear them from the board.
Puzzle Game	Number Maze	A puzzle game where players navigate a maze by following a numeric sequence.
Puzzle Game	Color Match Challenge	A puzzle game where players match and eliminate blocks of the same color to clear the board and earn points. Swap adjacent blocks to create matches of three or more, strategically complete levels with increasing difficulty, and utilize bonuses and power-ups for enhanced gameplay.
Puzzle Game	Shape Shifter	Shape Shifter is a puzzle game where players have to rearrange geometric shapes to match a target pattern. Players are given a set of shapes, including squares, triangles, and circles, and they need to rotate and position the shapes correctly to form the desired pattern.
Puzzle Game	Slide Puzzle Challenge	Slide Puzzle Challenge is a puzzle game where players have to rearrange numbered tiles on a grid to form a specific pattern. The tiles are initially shuffled and players need to slide them horizontally or vertically to bring them into the correct order. The game includes multiple difficulty levels, timer to track solving time, and the ability to save progress. It also provides hints to help playe…
Puzzle Game	Number Connect	A puzzle game where players have to connect numbers in a sequence to form a path
Puzzle Game	Color Link Puzzle	Color Link Puzzle is a puzzle game where players have to connect adjacent blocks of the same color to clear them from the grid. The objective is to create links by dragging a line from one block to another of the same color, ensuring that the path between them is not blocked by other blocks. The game includes multiple levels with increasing difficulty, bonuses, and power-ups to enhance gameplay.
Puzzle Game	Time Attack Puzzler	A puzzle game where players have to solve a series of puzzles within a limited time.
Puzzle Game	Color Block Blast	Color Block Blast is a puzzle game where players have to match and eliminate blocks of the same color to clear the board and earn points. Players need to strategically swap adjacent blocks to create matches of three or more. As players progress through levels, the difficulty increases and they can utilize bonuses and power-ups for enhanced gameplay.
Puzzle Game	Maze Escape Challenge	Maze Escape Challenge is a puzzle game where players have to navigate through a maze to reach the exit. The maze is filled with obstacles and players must find the correct path by strategically moving through the maze. The game includes multiple levels of increasing difficulty, and players can track their progress and completion time.
Puzzle Game	Gem Blast	Gem Blast is a puzzle game where players have to match and eliminate gems of the same color to clear the board and earn points. Players need to strategically swap adjacent gems to create matches of three or more. As players progress through levels, the difficulty increases and they can utilize bonuses and power-ups for enhanced gameplay.
Puzzle Game	Puzzle Blast	Puzzle Blast is a puzzle game where players have to match and clear blocks of the same color to earn points and advance to the next level. Players need to strategically swap adjacent blocks to create matches of three or more. As players progress through levels, the difficulty increases, and they can utilize bonuses and power-ups for enhanced gameplay.
Puzzle Game	Slide Maze Challenge	Slide Maze Challenge is a puzzle game where players have to navigate through a maze by sliding tiles horizontally or vertically. The objective is to move the player character from the starting point to the exit tile, avoiding obstacles and traps along the way. The game includes multiple levels with increasing difficulty, timer to track solving time, and the ability to save progress. Players can a…
Puzzle Game	Maze Runner	Maze Runner is a puzzle game where players have to navigate through a maze to reach the exit. The maze is filled with obstacles and players must find the correct path by strategically moving through the maze. The game includes multiple levels of increasing difficulty, and players can track their progress and completion time. They can also earn bonus points by collecting stars scattered throughout…
Puzzle Game	Block Slide Escape	Block Slide Escape is a puzzle game where players have to escape from a maze by strategically sliding blocks horizontally or vertically. Navigate the player character to the exit tile by clearing a path with sliding blocks. The game includes multiple levels with increasing difficulty and obstacles to overcome. Save your progress and challenge your problem-solving skills in this addictive block sl…
Puzzle Game	Puzzle Path Finder	Puzzle Path Finder is a puzzle game where players navigate through a grid by creating a path from the starting point to the goal. Players strategically place directional arrows to guide the character, and each arrow can be rotated. The objective is to find the optimal path with the fewest number of arrows. The game includes multiple levels with increasing complexity and provides progress tracking…
Puzzle Game	Color Link Maze	Color Link Maze is a puzzle game where players have to navigate through a maze by connecting blocks of the same color. The objective is to create a continuous path by dragging a line from one block to another of the same color, ensuring the path is not blocked by other blocks or obstacles in the maze. The game includes multiple levels with increasing difficulty, bonuses, and power-ups to enhance …
Puzzle Game	Block Swap Challenge	Block Swap Challenge is a puzzle game where players strategically swap adjacent blocks to create matches of three or more. Clear the board by eliminating a certain number of blocks within a limited number of moves. Multiple levels with increasing difficulty, earn bonus points with combos or power-ups.
Puzzle Game	Color Swap Challenge	Color Swap Challenge is a puzzle game where players strategically swap adjacent blocks of different colors to create matches of three or more. The objective is to clear the board by eliminating a certain number of blocks within a limited number of moves. The game includes multiple levels with increasing difficulty and allows players to earn bonus points with combos or power-ups.
Puzzle Game	Shape Twist	Shape Twist is a puzzle game where players have to rotate and flip geometric shapes to fit them into a given silhouette. Players are presented with a silhouette and a set of shapes, including squares, triangles, and circles. They need to manipulate the shapes by rotating and flipping them to find the correct orientation and placement that matches the silhouette.
Puzzle Game	Block Puzzle Challenge	Block Puzzle Challenge is a puzzle game where players have to strategically place blocks on a grid to create complete rows and columns. The objective is to clear as many rows and columns as possible to earn points and prevent the grid from filling up. Players are given a selection of blocks of various shapes and sizes, and they need to carefully consider the placement of each block to maximize th…
Puzzle Game	Symbolic Sudoku Challenge	Symbolic Sudoku Challenge is a puzzle game where players have to fill a 9x9 grid with symbols from a given set, such as numbers, letters, or shapes. The objective is to ensure that each row, column, and 3x3 subgrid contains all the symbols exactly once. The game includes multiple difficulty levels and provides hints to help players if they get stuck.
Puzzle Game	Block Twist Challenge	Block Twist Challenge is a puzzle game where players have to rotate and twist blocks to fit them into a given pattern. The game presents players with a pattern made up of empty spaces and incomplete shapes. Players are given a set of blocks with different shapes and sizes, and they need to rotate and twist the blocks to fit them into the pattern in the correct orientation and arrangement.
Puzzle Game	Picture Perfect	Picture Perfect is a puzzle game where players have to recreate an image by rearranging scrambled puzzle pieces. Each puzzle piece represents a portion of the image, and players need to strategically rotate and connect the pieces to form a complete picture. The game includes multiple levels with increasing difficulty, providing a challenging and visually engaging puzzle-solving experience.
Puzzle Game	Number Mystery	Number Mystery is a puzzle game where players solve number-based puzzles to uncover hidden messages or patterns. Each puzzle presents a series of numbers with a hidden rule or logic. Players need to decipher the rule and apply it to solve the puzzle, revealing a hidden message or pattern. The game includes multiple levels with increasing complexity and offers hints to help players if they get stu…
Puzzle Game	Pattern Block Challenge	Pattern Block Challenge is a puzzle game where players have to arrange a set of pattern blocks to fill a given shape on the grid. Players are provided with a variety of pattern blocks, each with a unique shape and size, and they need to rotate and position the blocks correctly to completely fill the target shape. The game includes multiple levels with increasing complexity and offers hints to ass…
Puzzle Game	Word Grid Challenge	Word Grid Challenge is a puzzle game where players have to find hidden words within a grid of letters. They can connect adjacent letters horizontally, vertically, or diagonally to form words. The game includes multiple levels with increasing difficulty, a timer to track solving time, and the ability to earn bonus points by finding special words. Players can also challenge their friends and compet…
Puzzle Game	Block Matcher Challenge	Block Matcher Challenge is a puzzle game where players have to strategically swap adjacent blocks to create matches of three or more blocks of the same color. The objective is to clear the board by eliminating a certain number of blocks within a limited number of moves. The game includes multiple levels with increasing difficulty, and players can earn bonus points with combos or power-ups.
Racing Game	Racing Challenge	Racing Challenge is a simple racing game software that allows players to compete against each other in a thrilling race. Players can choose from different race tracks and vehicles, each with its own unique characteristics. The main objective is to complete the race in the shortest time possible by avoiding obstacles and strategically using boosters. The game features realistic physics and immersi…
Racing Game	Speed Racer	Speed Racer is a racing game software where players can compete in fast-paced races on various challenging tracks. The game offers different modes such as single-player, multiplayer, and time trials. Players can choose from a variety of vehicles with unique characteristics and customize them to suit their style. The software features realistic physics and dynamic weather conditions to provide an …
Racing Game	TrackMaster	Design and build custom race tracks, race against opponents, and challenge friends in multiplayer races.
Racing Game	Racing Master	Racing Master is a racing game software that puts players in control of their own racing team. Players can manage all aspects of team management, including hiring drivers, upgrading vehicles, and strategizing race tactics. The main objective is to win championships in different racing categories by outperforming rival teams. The game offers a variety of race tracks and challenging weather conditi…
Racing Game	Turbo Racer	Turbo Racer is a racing game software that offers an adrenaline-pumping experience with high-speed races on futuristic tracks. Players can choose from a variety of advanced vehicles equipped with turbo boosters for lightning-fast acceleration. The objective is to outmaneuver opponents, avoid obstacles, and cross the finish line in record time. The game features dynamic environments with gravity-d…
Racing Game	Nitro Dash	Nitro Dash is a racing game software that offers fast-paced, high-octane races on urban streets. Players can choose from a variety of street racing vehicles, each with its own unique abilities and customization options. The main objective is to outmaneuver opponents, drift through corners, and activate nitro boosts to reach the finish line first. The game features thrilling race tracks with tight…
Racing Game	Speed Boost	Speed Boost is a racing game software that focuses on the thrilling mechanic of speed boosting...
Racing Game	Racing Showdown	Racing Showdown is a racing game software that allows players to compete in head-to-head races against AI opponents. Players can choose from a variety of vehicles with different attributes and upgrades to enhance their performance on the race track. The main objective is to finish the race in the first position by skillfully maneuvering through obstacles and strategically using power-ups. The gam…
Racing Game	Breakneck Racer	Breakneck Racer is a racing game software that offers high-speed races on twisty and challenging tracks. Players can choose from a range of powerful and agile cars, each with its own unique handling and acceleration characteristics. The objective is to navigate through the track, avoiding obstacles and sharp turns, while maintaining top speed to outrun opponents. The game features realistic physi…
Racing Game	Top Gear Challenge	Top Gear Challenge is a racing game software that combines skill-based racing and puzzle-solving. Players navigate through challenging tracks within a time limit, collecting bonus points along the way. The game features intuitive controls, realistic physics, and stunning graphics for an immersive experience.
Racing Game	Turbo Chase	Turbo Chase is a racing game software that adds an exciting twist to traditional racing games. In this game, players will not only race against other opponents but also need to navigate through a city while being chased by a relentless police force. The main objective is to outrun the police and successfully complete the race without getting caught. Players can choose from a variety of fast and a…
Racing Game	Fast Lane Fury	Fast Lane Fury is a racing game software that combines intense speed, exciting challenges, and beautiful landscapes. Players can choose from a variety of high-performance supercars and compete in thrilling races on iconic tracks around the world. The objective is to outmaneuver opponents, master sharp turns, and reach the finish line first. The game features realistic physics and stunning graphic…
Racing Game	Extreme Drift	Extreme Drift is a racing game software that focuses on the thrilling mechanic of drifting. Players can compete in exhilarating races on challenging tracks specially designed for drifting. The objective is to accumulate the highest possible drift score by executing precise and stylish drifts around corners. The game features a variety of drift cars with unique handling and customization options, …
Racing Game	Turbo Drift	Turbo Drift is a racing game software that specializes in the challenging and exhilarating mechanic of drifting. Players will compete in adrenaline-fueled races on specifically designed tracks that require precise and stylish drifts to achieve high scores. The game will feature a selection of drift cars with unique handling and customization options, along with realistic physics and stunning grap…
Racing Game	Neon Circuit	Neon Circuit is a racing game software that takes players into a futuristic world with neon-lit race tracks. Players can choose from a selection of high-performance vehicles and compete against opponents in fast-paced races. The main objective is to reach the finish line first by skillfully navigating through sharp turns and avoiding obstacles. The game features stunning graphics, dynamic environ…
Racing Game	Drift Rivals	Drift Rivals is a racing game software that focuses on the exciting and skill-based mechanic of drifting. Players can compete in intense drift challenges on a variety of tracks specifically designed for drifting. The objective is to earn the highest score by executing precise and stylish drifts around corners. The game offers a selection of drift cars with unique handling and customization option…
Racing Game	Street Racers	Street Racers is a racing game software that focuses on illegal street racing in urban environments. Players can choose from a variety of street racing cars and compete against AI opponents in thrilling races through city streets, highways, and back alleys. The main objective is to outmaneuver opponents, navigate through traffic, and reach the finish line first while avoiding capture by law enfor…
Racing Game	Speed Master	Speed Master is a racing game software that focuses on time trials and individual performance. Players can choose from a variety of high-performance vehicles and compete to set the fastest lap times on a range of challenging tracks. The main objective is to master the tracks by finding the best racing line, optimizing speed through corners, and efficiently using boosters. The game features realis…
Racing Game	Speed Sprint	Speed Sprint is a racing game software that focuses on short sprint races. Players compete in fast-paced races on straight tracks, aiming to reach the finish line in the shortest time possible. The game features a variety of high-performance vehicles with different acceleration capabilities. Players can customize their vehicles and optimize them for speed. The objective is to master the starts an…
Racing Game	Gravity Speedway	Gravity Speedway is a racing game software that takes place in space, where players compete in high-speed races using anti-gravity vehicles. Players can choose from a variety of futuristic vehicles, each with unique handling and acceleration capabilities. The main objective is to navigate through challenging race tracks filled with obstacles and sharp turns, utilizing the anti-gravity technology …
Racing Game	Supercharged Speedway	Supercharged Speedway is a racing game software that combines high-speed racing with power-ups and unique track features. Players can choose from a variety of vehicles, each with its own special ability, and compete in intense races on thrilling tracks. The main objective is to outmaneuver opponents, collect power-ups, and strategically use them to gain an advantage. The game features immersive g…
Racing Game	Speed Shift	Speed Shift is a racing game software that combines fast-paced racing with the unique mechanics of shifting gears. Players can choose from a variety of high-performance vehicles and compete in exhilarating races on challenging tracks. The main objective is to outmaneuver opponents, navigate through sharp turns, and strategically shift gears to maintain optimal speed. The game features realistic p…
Racing Game	Ultimate Drag Race	Ultimate Drag Race is a racing game software that focuses on high-speed drag races. Players will participate in thrilling head-to-head races on straight tracks, competing to reach the finish line in the shortest time possible. The game features a variety of customizable drag racing cars with unique acceleration and handling characteristics. Players can optimize their cars for maximum performance …
Racing Game	Speed Boost Xtreme	Speed Boost Xtreme is a racing game software that combines high-speed racing with the thrilling mechanic of speed boosting...
Racing Game	Drift Legends	Drift Legends is a racing game software that focuses on the thrilling and skillful mechanic of drifting. Players can compete in intense drift competitions on various tracks designed specifically for drifting. The objective is to accumulate the highest possible drift score by executing precise and stylish drifts around corners. The game offers a selection of drift cars with unique handling and cus…
Racing Game	Turbo Rally	Turbo Rally is a racing game software that combines off-road driving with intense rally racing. Players can choose from a variety of rugged vehicles and compete in thrilling rally races on challenging off-road tracks. The objective is to navigate through rough terrain, dodge obstacles, and reach the finish line in the shortest time possible. The game features realistic physics, dynamic weather co…
Racing Game	Turbo Drift Extreme	Turbo Drift Extreme is a racing game software that combines the thrilling mechanic of drifting with extreme challenges. Players will compete in adrenaline-fueled drift races on specially designed tracks that test their skills and style. The objective is to earn the highest drift score by executing precise and stylish drifts around corners, while also avoiding obstacles and maintaining control. Th…
Racing Game	Racing Dash	Racing Dash is a racing game software that offers an immersive and adrenaline-pumping experience with high-speed races on city streets. Players can choose from a variety of sleek and powerful street racing cars and compete in thrilling races against AI opponents. The objective is to outmaneuver opponents, navigate through traffic, and reach the finish line first. The game features realistic physi…
Racing Game	City Sprint	City Sprint is a racing game software that allows players to experience fast-paced races through the vibrant streets of a bustling city. Players can choose from a selection of high-performance cars and race against AI opponents in thrilling sprint races. The objective is to navigate through traffic, avoid obstacles, and finish the race in the shortest time possible. The game features immersive gr…
Racing Game	Cross Country Challenge	The Cross Country Challenge is a thrilling racing game software that lets players compete in exciting off-road races across diverse and challenging terrains. With a selection of rugged vehicles to choose from, each with unique handling and customization options, players must skillfully navigate through treacherous landscapes, overcome obstacles, and reach the finish line in record time. Boasting …
Reference&Books	Bookshelf Manager	Develop a software application that allows users to efficiently manage their personal book collections. Users can input book details, categorize books into custom-defined shelves, add personal notes and ratings, and generate reports on their book collection. The software provides search and filter functionalities for easy access to desired books.
Reference&Books	WordQuest	A software application that helps users build their vocabulary and enhance their language skills through interactive games and quizzes. It provides a wide range of word lists and engaging activities like word matching, puzzles, and fill in the blanks. Users can track their progress and receive personalized suggestions for improvement.
Reference&Books	BookLift	A software application that provides personalized book recommendations, allowing users to discover new books based on their preferences. Users can create profiles, input their preferred genres, and rate books. BookLift generates tailored book recommendations, suggests titles from various genres, offers comprehensive book details, and includes a book discovery section for exploring curated collect…
Reference&Books	Knowledge Source	A centralized platform for users to access and explore a wide range of reference materials, books, and educational resources. Users can search for specific topics, browse categories, access detailed information, and utilize features such as bookmarking, highlighting, and note-taking.
Reference&Books	Read&Learn	Read&Learn is a software application that allows users to access a vast collection of reference materials and books. Users can browse through different categories, search for specific titles, bookmark their favorite content, and even highlight and annotate text. The app also offers a personalized reading experience, allowing users to customize the font size, background color, and reading mode. Wi…
Reference&Books	Bookpedia	Organize and manage your personal book collection with ease. Add books manually or scan barcodes to automatically fetch details. Create custom categories, tags, and ratings for personalized organization. Get book recommendations based on your preferences and track your reading progress.
Reference&Books	eTourGuide	A software application that provides users with virtual tours of famous libraries and bookstores. Users can explore these spaces through 360-degree photos and videos, learn about the architecture and history of each location, and even access virtual bookshelves containing popular books from those libraries. The app offers an immersive and educational experience for book lovers.
Reference&Books	BookConnect	A software application that allows users to connect and collaborate with other book enthusiasts. Users can create profiles, join or create book clubs, participate in discussions, share book recommendations, and even organize virtual book readings. BookConnect provides a platform for users to connect with like-minded individuals, share their reading experiences, and foster a sense of community in …
Reference&Books	BookWorm Search	BookWorm Search is a software application that helps users easily search for books in their personal libraries or online. It provides a simple and intuitive interface where users can enter the title, author, or keywords related to the book they are searching for. The software then displays matching results with relevant book details such as title, author, summary, and cover image. Users can click…
Reference&Books	BookNote	BookNote is a software application that allows users to create and manage digital notes for books. Users can input book details, create notes for each chapter or section, add text notes, highlight passages, and attach images or audio recordings. The notes are organized and categorized for easy access, and a search functionality is provided for quick retrieval of specific books or notes.
Reference&Books	QuickRead	QuickRead is a software application that allows users to access and read summaries of books in various genres. Users can browse through the collection, search for specific titles, and read concise summaries written by experts. QuickRead aims to provide users with a quick overview of books, helping them make informed decisions about which books to invest their time in.
Reference&Books	BookClub Connect	BookClub Connect is a software application that aims to bring book enthusiasts together by helping them discover and join book clubs based on their interests. Users can create profiles, indicate their preferred genres, and browse through a curated list of book clubs. They can join clubs, participate in discussions, share book recommendations, and even organize virtual book readings. BookClub Conn…
Reference&Books	WordSearch	A software application that allows users to search for specific words or phrases within a collection of books. Users can input the word or phrase they are looking for, and the software will display a list of books that contain the search term. Users can then click on a book to view the specific page or paragraph where the word or phrase appears.
Reference&Books	BookClub Recommender	A software application that recommends book clubs to users based on their reading preferences and interests. Users can create profiles, input their preferred genres, and specify their reading goals. The software analyzes this information and generates personalized recommendations of book clubs that align with the user
Reference&Books	QuickLearn	QuickLearn is a software application that provides users with concise summaries of educational resources and reference materials. It allows users to easily search for specific topics or browse through categories to find relevant summaries. The app aims to help users quickly grasp key concepts and information from various sources.
Reference&Books	BookQuest	A software application that allows users to embark on a virtual treasure hunt for books. Users can explore a digital world filled with different book-themed landscapes and challenges. They can search for hidden books, solve puzzles and riddles to unlock new book-related content, and collect virtual bookmarks as rewards. BookQuest aims to make the process of discovering and exploring books a fun a…
Reference&Books	BookSearchPlus	BookSearchPlus is a software application that provides users with the ability to search for books based on specific criteria such as title, author, genre, or keywords. The software offers a user-friendly interface where users can input their search criteria and view a list of matching books. Additional features include sorting options, book ratings and reviews, and the ability to save search resu…
Reference&Books	Book Recommendation Analyzer	Book Recommendation Analyzer is a software application that analyzes a user
Reference&Books	BookQuote	BookQuote is a software application that allows users to discover and share meaningful quotes from their favorite books. Users can search for quotes by book title, author, or keyword, and the software will display a collection of relevant quotes. Users can also create profiles, save their favorite quotes, and share them with others on social media platforms. BookQuote aims to inspire readers and …
Reference&Books	BookWise	BookWise is a software application that allows users to track and manage their reading progress. Users can create profiles and add books to their virtual bookshelf. They can set reading goals, track the number of pages or chapters they have read, and mark books as "read" or "currently reading." BookWise also provides personalized reading recommendations based on users
Reference&Books	BookReview Tracker	BookReview Tracker is a software application that helps users keep track of the books they have read and their reviews for each book. Users can create profiles, add books to their reading list, and rate and write reviews for each book. The software provides a user-friendly interface where users can easily input and update their reviews. It also offers search and filter functionalities for easy ac…
Reference&Books	BookTrivia	BookTrivia is a software application that offers users a platform to test and expand their knowledge of books through engaging quizzes and trivia games. Users can choose from various categories such as classics, mystery, fantasy, and more. The software provides a collection of questions related to book plots, characters, authors, and literary facts. Users can track their scores, compete with frie…
Reference&Books	BookTrack	BookTrack is a software application that allows users to track their reading progress and organize their book-related activities. Users can create profiles, add books to their reading list, track the number of pages or chapters they have read, and mark books as "read" or "currently reading." BookTrack also provides features such as setting reading goals, generating reading statistics, and receivi…
Reference&Books	QuoteVault	QuoteVault is a software application that allows users to explore and save their favorite book quotes. Users can search quotes by book title, author, or topic and create personalized collections. They can also create profiles, save their favorite quotes, and share them with others through social media. With QuoteVault, users can easily find and revisit meaningful quotes, fostering a community cen…
Reference&Books	BookFlow	BookFlow is a software application that helps users enhance their reading experience by providing a platform for immersive book discussions. Users can create profiles, join or create book clubs, participate in discussions, share their thoughts and opinions, and even organize virtual book readings. BookFlow offers a user-friendly interface where users can explore various genres, join existing disc…
Reference&Books	QuickSearch	QuickSearch is a software application that allows users to quickly search for specific words or phrases within a collection of reference materials and books. Users can input the word or phrase they are looking for, and the software will display a list of matching results with relevant book details such as title, author, summary, and cover image. Users can click on a book to view more information …
Reference&Books	QuickStudy	QuickStudy is a software application that provides users with concise summaries and key takeaways from non-fiction books. Users can search for specific topics or browse through categories to find relevant summaries. The app aims to help users quickly grasp the main concepts and insights from various reference materials and enhance their knowledge in a time-efficient manner.
Reference&Books	Bookshelf Recommendations	Bookshelf Recommendations is a software application that provides personalized recommendations for users
Reference&Books	BookLocator	BookLocator is a software application that helps users easily locate physical books in libraries or bookstores. Users can input the title, author, or keywords related to the book they are searching for, and the software will provide real-time information on the availability and location of the book within the selected library or bookstore. BookLocator also offers features such as book reservation…
Reference&Books	Bookshelf Analyzer	A software application that analyzes users
Restaurants&Delivery	FoodBuddy	A Restaurants&Delivery software application that allows users to discover and order food from nearby restaurants. It provides a user-friendly interface where users can browse through a variety of restaurants, view their menu items, and place orders for pickup or delivery. Features like order tracking, payment options, and customer reviews enhance the overall user experience.
Restaurants&Delivery	RestaurantOrder	RestaurantOrder is a software application that allows users to conveniently place and track their orders from various restaurants for delivery or pickup...
Restaurants&Delivery	DeliveryMate	DeliveryMate is a software application designed to streamline deliveries for restaurants. It provides a centralized platform for customers to place orders, enables restaurants to manage incoming orders, and allows delivery personnel to track and fulfill orders efficiently.
Restaurants&Delivery	Menu Planner	Enable users to plan and organize their meals from restaurants by browsing menus, selecting dishes, and adding them to their meal plan.
Restaurants&Delivery	OrderEase	OrderEase is a Restaurants&Delivery software application that simplifies the process of placing and managing orders for both customers and restaurants...
Restaurants&Delivery	CuisineConnect	CuisineConnect is a Restaurants&Delivery software application that connects users with local restaurants and allows them to collaborate on customizing their meals. Users can browse through menus, select their desired dishes, and then have the option to communicate directly with the restaurant to make modifications or request special dietary requirements. The software also enables users to schedul…
Restaurants&Delivery	QuickEats	QuickEats is a Restaurants&Delivery software application that provides a fast and efficient way for users to order food from nearby restaurants. It focuses on speed and convenience by allowing users to quickly browse through a curated selection of popular dishes from local restaurants. Users can easily add items to their cart and place orders for pickup or delivery with a few clicks. QuickEats al…
Restaurants&Delivery	QuickBite	QuickBite is a Restaurants&Delivery software application that offers personalized restaurant recommendations to users based on their preferences. It allows users to browse menus, view ratings and reviews, and place orders for pickup or delivery.
Restaurants&Delivery	FoodHub	FoodHub is a Restaurants&Delivery software application that allows users to discover and order food from a curated selection of popular restaurants. It provides a user-friendly interface where users can browse through a variety of restaurants, view their menu items, and place orders for pickup or delivery. FoodHub aims to provide convenience and speed by focusing on popular restaurants and dishes…
Restaurants&Delivery	Dine-inExpress	Dine-inExpress is a Restaurants&Delivery software application that allows users to make reservations for dine-in at their favorite restaurants. It provides a user-friendly interface where users can search for nearby restaurants, view their availability for dine-in, and reserve a table. The software also offers features like browsing menus, viewing customer reviews, and making special requests for…
Restaurants&Delivery	MealBox	MealBox is a Restaurants&Delivery software application that offers a subscription service for users to receive weekly meal kits from a variety of partner restaurants. Users can customize their meal plan by browsing through different menu options, selecting their desired dishes, and scheduling the delivery time. MealBox aims to provide a convenient and personalized dining experience by delivering …
Restaurants&Delivery	MenuSaver	MenuSaver is a Restaurants&Delivery software application that allows users to save their favorite menus from different restaurants. Users can browse through menus, select their desired dishes, and save them to their personal menu collection.
Restaurants&Delivery	SmartServe	SmartServe is a Restaurants&Delivery software application that enhances the dining experience by providing personalized recommendations and seamless ordering options. Users can create profiles and input their preferences for cuisine, dietary restrictions, and delivery preferences. The software uses sophisticated algorithms to analyze user data and recommend restaurants and menu items that match t…
Restaurants&Delivery	QuickOrder	QuickOrder is a Restaurants&Delivery software application that allows users to quickly and conveniently place food orders from their favorite restaurants. It provides a simple and intuitive interface where users can browse through a curated selection of popular dishes, add them to their cart, and place orders for pickup or delivery.
Restaurants&Delivery	QuickPick	QuickPick is a Restaurants&Delivery software application that allows users to quickly browse and select popular dishes from nearby restaurants for pickup or delivery. It streamlines the ordering process by providing a curated selection of dishes from various cuisines. Users can easily add items to their cart, select their preferred pickup or delivery option, and place orders with just a few click…
Restaurants&Delivery	SmartCart	SmartCart is a Restaurants&Delivery software application that aims to streamline the ordering process for users. It provides a user-friendly interface where users can build their own customized meals by selecting dishes from various partner restaurants. Users can easily browse through menus, add items to their cart, and place orders for pickup or delivery. SmartCart also offers features like real…
Restaurants&Delivery	QuickServe	QuickServe is a Restaurants&Delivery software application that focuses on providing fast and convenient meal options for busy individuals. It offers a curated selection of pre-prepared meals from various local restaurants. Users can browse through the available dishes, select their desired meals, and place orders for pickup or delivery. QuickServe aims to streamline the ordering process by elimin…
Restaurants&Delivery	QuickServe	QuickServe is a Restaurants&Delivery software application that focuses on providing fast and convenient ready-to-eat meal options for busy individuals. It offers a curated selection of pre-prepared meals from various local restaurants, streamlining the ordering process. Users can browse through available dishes, select their desired meals, and place orders for pickup or delivery with speed and si…
Restaurants&Delivery	QuickDelivery	QuickDelivery is a Restaurants&Delivery software application that focuses on providing fast and efficient delivery services for users. It allows users to easily browse through a curated selection of popular dishes from local restaurants and place orders for delivery. Users can track the progress of their orders in real-time and benefit from seamless payment options.
Restaurants&Delivery	MenuExpress	MenuExpress is a Restaurants&Delivery software application that allows users to create personalized menus from their favorite local restaurants. Users can browse through various restaurant menus, select dishes they want to include in their menu, and save their customized menu for future reference. MenuExpress also provides options to schedule delivery or pickup, ensuring a convenient dining exper…
Restaurants&Delivery	QuickDine	QuickDine is a Restaurants&Delivery software application that offers a streamlined dining experience for users. It allows users to browse through nearby restaurants, view their menus, and place orders for pickup or delivery. The software focuses on simplicity and efficiency, with features like real-time order tracking and seamless payment options. QuickDine aims to provide a convenient and hassle…
Restaurants&Delivery	FoodExplorer	FoodExplorer is a Restaurants&Delivery software application that enhances the food exploration experience for users. It provides a user-friendly interface where users can browse through various cuisines and discover new restaurants and menu items. Users can view detailed descriptions and images of dishes, read customer reviews, and place orders for pickup or delivery. FoodExplorer also offers per…
Restaurants&Delivery	FoodGenie	FoodGenie is a Restaurants&Delivery software application that simplifies the process of discovering new restaurants and ordering food. Users can browse through a variety of restaurants, view menus, and place orders for pickup or delivery. FoodGenie offers personalized recommendations, order tracking, and seamless payment options to enhance the overall user experience.
Restaurants&Delivery	QuickBites	QuickBites is a Restaurants&Delivery software application that offers a personalized dining experience to users. It allows users to browse through a curated selection of popular dishes from nearby restaurants, view ratings and reviews, and place orders for pickup or delivery. QuickBites uses a sophisticated recommendation algorithm to suggest dishes based on user preferences and previous order hi…
Restaurants&Delivery	QuickServe Plus	QuickServe Plus is a Restaurants&Delivery software application that focuses on providing fast and convenient ready-to-eat meal options for busy individuals. It offers a curated selection of pre-prepared meals from various local restaurants, streamlining the ordering process. Users can browse through available dishes, select their desired meals, and place orders for pickup or delivery with speed a…
Restaurants&Delivery	Dine-inReserve	Dine-inReserve is a Restaurants&Delivery software application that allows users to make reservations for dine-in at their favorite restaurants. It provides a user-friendly interface where users can search for nearby restaurants, view their availability for dine-in, and reserve a table. The software also offers features like browsing menus, viewing customer reviews, and making special requests for…
Restaurants&Delivery	TastyTakeout	TastyTakeout is a Restaurants&Delivery software application that offers a user-friendly platform for users to discover and order food from local restaurants. It provides a comprehensive database of nearby restaurants, along with their menus and customer reviews. Users can browse through various cuisines, view detailed descriptions of dishes, and place orders for pickup or delivery. TastyTakeout a…
Restaurants&Delivery	QuickBite Plus	QuickBite Plus is a Restaurants&Delivery software application that offers personalized restaurant recommendations and a subscription service for weekly meal kits. Users can browse menus, view ratings and reviews, and place orders for pickup or delivery. The software prioritizes user preferences and provides a curated selection of dishes from partner restaurants. In addition, users can customize t…
Restaurants&Delivery	QuickMenu	QuickMenu is a Restaurants&Delivery software application that focuses on providing users with a fast and efficient way to browse and order from a variety of menus. It offers a curated selection of popular dishes from nearby restaurants, allowing users to quickly find and order their favorite meals for pickup or delivery. QuickMenu aims to simplify the menu exploration process and enhance the over…
Restaurants&Delivery	QuickMeal	QuickMeal is a Restaurants&Delivery software application that provides users with a fast and efficient way to select and order pre-made meal packages from local restaurants. Users can browse through a curated selection of meal packages, consisting of a main course, side dish, and dessert, and place orders for pickup or delivery. The software focuses on convenience, simplicity, and offers features…
Role Playing Game	Quest Tracker	A software application that helps role-playing game players keep track of their quests and objectives in the game. It allows users to add, update, and complete quests, as well as view their progress and rewards. The application provides a user-friendly interface with customizable categories and tags for easy organization. It also includes a reminder system to notify users of upcoming deadlines an…
Role Playing Game	Character Builder	A software application that allows users to create and customize their own role-playing game characters. Users can select various attributes such as race, class, abilities, and equipment to build their ideal character. The application also provides a visual representation of the character, allowing users to see how their choices affect the overall appearance. Additionally, it offers a leveling sy…
Role Playing Game	Role Playing Battle Simulator	A software that simulates epic battles in a role-playing game (RPG) setting. Players can create custom teams of characters with unique abilities and strategies, and the software will generate realistic battle scenarios. Players can control their characters
Role Playing Game	Loot Tracker	A software application that helps role-playing game players track and manage their loot and inventory. It allows users to add, remove, and organize items in their inventory, as well as view detailed information about each item. The application provides a user-friendly interface with customizable categories and sorting options for easy organization. It also includes a search function to quickly fi…
Role Playing Game	Character Progression Tracker	A software application that helps role-playing game players track and visualize the progression of their characters in the game. Users can input the attributes, skills, and equipment of their characters at different levels or milestones, and the application will generate a visual representation of their character
Role Playing Game	Inventory Trading Board	A software application that allows role-playing game players to buy, sell, and trade items with other players within the game. It provides a platform for players to advertise their items, set prices, and negotiate trades with other players. The application includes a search feature, messaging system, and rating system for secure and efficient item trading.
Role Playing Game	Quest Tracker Plus	Quest Tracker Plus is a software application that helps role-playing game players keep track of their quests and objectives. In addition to allowing users to add, update, and complete quests, it provides a built-in quest guide feature. The quest guide offers hints, tips, and strategies for completing quests, enhancing the overall gameplay experience. Users can also view their quest progress, rewa…
Role Playing Game	Skill Planner	Skill Planner is a software application that allows role-playing game players to plan and customize their character
Role Playing Game	Quest Companion	A software application that assists role-playing game players in completing quests by providing step-by-step guidance and tracking their progress. It offers quest-specific tips, strategies, and objectives, helping players navigate through challenging quests. The application allows users to mark completed objectives, track their overall progress, and view detailed quest information. A user-friendl…
Role Playing Game	Achievement Tracker	A software application that helps role-playing game players keep track of their achievements and goals in the game. It allows users to add, update, and complete achievements, as well as view their progress and rewards. The application provides a user-friendly interface with customizable categories and tags for easy organization. It also includes a reminder system to notify users of upcoming deadl…
Role Playing Game	Monster Encyclopedia	A software application that allows role-playing game players to keep track of all the monsters they encounter in the game. It provides detailed information about each monster, including their stats, abilities, weaknesses, and rewards for defeating them. Users can add new monsters to their encyclopedia, update information, and mark monsters as defeated. The application also includes a search funct…
Role Playing Game	Party Formation Assistant	A software application that assists role-playing game players in creating balanced and optimal party formations. It analyzes the strengths and weaknesses of different characters and provides recommendations on which characters should be included in the party to maximize effectiveness in combat scenarios. The application takes into account factors such as character class, abilities, and team syner…
Role Playing Game	Party Skill Combiner	A software application that helps role-playing game players optimize their party
Role Playing Game	Party Class Balancer	A software application that helps role-playing game players create balanced parties by recommending the optimal combination of character classes. Players can input the available character classes and their corresponding abilities, and the application will analyze the strengths and weaknesses of each class. Based on this analysis, it will suggest the best combination of classes to create a well-ro…
Role Playing Game	Quest Journal	A software application that allows role-playing game players to keep track of their quests, including the quest details, objectives, and progress. It provides a user-friendly interface with customizable categories and tags for efficient organization. The application also includes a reminder system to notify users of upcoming deadlines and events related to their quests.
Role Playing Game	Dungeon Mapper	Dungeon Mapper is a software application that allows role-playing game players to create and customize their own dungeon maps. Users can design various layouts, including rooms, corridors, traps, and treasures, to build immersive and challenging dungeons for their games. The application provides an intuitive interface with drag-and-drop functionality for easy map creation. Additionally, it offers…
Role Playing Game	Game Lore Library	A software application that allows role-playing game players to access and explore a comprehensive collection of game lore and world-building information. It provides detailed descriptions of characters, locations, factions, and historical events within the game world, enabling players to immerse themselves in the rich lore of the game.
Role Playing Game	Quest Progress Visualization	Quest Progress Visualization is a software application that provides an engaging visual representation of quest progress in role-playing games. Users can input their active quests and track their progress through an interactive graphical interface. The software visualizes completed objectives, remaining tasks, and rewards in a way that is easy to understand and navigate. It enhances the gaming ex…
Role Playing Game	Quest Difficulty Analyzer	The Quest Difficulty Analyzer is a software application that allows role-playing game players to analyze the difficulty level of different quests in the game. Users can input quest parameters such as enemy strength, required skills, and time constraints, and the application will generate a difficulty rating for the quest. This rating will help players assess whether they are ready to take on a pa…
Role Playing Game	NPC Dialogue Generator	A software application that generates dynamic and immersive dialogue for non-player characters (NPCs) in a role-playing game. It uses an algorithm to create realistic and contextually appropriate dialogue based on the player
Role Playing Game	Skill Tree Builder	The Skill Tree Builder is a software application that allows role-playing game players to create and customize their own skill trees for their characters. Users can select various skills, abilities, and progression paths to build their ideal skill tree. The application provides a visual representation of the skill tree, allowing users to see how their choices affect the character
Role Playing Game	Skill Level Analyzer	Skill Level Analyzer is a software application that allows role-playing game players to analyze the level of difficulty of different skills in the game. Users can input skill parameters such as required attributes, complexity, and skill progression, and the application will generate a difficulty rating for the skill. This rating will help players assess whether they are ready to learn a particula…
Role Playing Game	Character Development Planner	The Character Development Planner is a software application that assists role-playing game players in planning and optimizing the development of their characters. Users can input their character attributes, skills, and desired progression paths, and the application will generate a detailed plan for skill allocation and attribute growth. The application provides visual representations of the chara…
Role Playing Game	Dungeon Puzzler	Dungeon Puzzler is a software application that combines role-playing game elements with puzzle-solving mechanics. Players navigate through dungeons filled with puzzles that require logic, problem-solving skills, and critical thinking to solve. The application provides a user-friendly interface with interactive puzzles, clues, and a hint system. With a focus on puzzle-solving rather than combat, D…
Role Playing Game	Quest Difficulty Analyzer	A software application that allows role-playing game players to analyze the difficulty level of different quests in the game. Users can input quest parameters such as enemy strength, required skills, and time constraints, and the application will generate a difficulty rating for the quest.
Role Playing Game	Character Progression Grapher	The Character Progression Grapher is a software application that allows role-playing game players to visualize and track the progression of their characters in the game. Users can input the attributes, skills, and equipment of their characters at different levels or milestones, and the application will generate a graph that illustrates the growth and development of the character over time. The gr…
Role Playing Game	Party Formation Simulator	A software application that simulates party formations in a role-playing game. Players can input the attributes, skills, and abilities of different characters, and the software will generate optimal party formations based on various factors such as class synergies, balanced roles, and combat effectiveness. The application provides a user-friendly interface with interactive visuals to help players…
Role Playing Game	Party Class Analyzer	Party Class Analyzer is a software application that allows role-playing game players to analyze the effectiveness and balance of different character class combinations within a party. Users can input the available character classes and their corresponding abilities, and the application will generate an analysis of the strengths and weaknesses of each class combination. Based on this analysis, it …
Role Playing Game	Party Quest Planner	Party Quest Planner is a software application that helps role-playing game players plan and coordinate quests with their party members. It allows users to create and manage quest groups, assign roles and responsibilities to each member, and track the progress of the quests. The application provides a user-friendly interface with customizable categories and tags for easy organization. It also incl…
Role Playing Game	Quest Difficulty Generator	The Quest Difficulty Generator is a software application that generates dynamic and challenging quests for role-playing games. It uses an algorithm to create quests with varying degrees of difficulty based on factors such as enemy strength, required skills, and time constraints. Each quest generated is unique and tailored to the player
Schedule	TimeWise	TimeWise is a schedule software application that helps individuals manage their time effectively. It allows users to create and organize tasks, set priorities, and allocate time for each task. Users can also track their progress, receive reminders, and generate reports to analyze their productivity.
Schedule	DayPlanner	The DayPlanner software is designed to help individuals plan and organize their daily activities efficiently. It provides a user-friendly interface where users can input their tasks, set priorities, and categorize them based on different criteria such as work, personal, or other custom categories. The software allows users to allocate specific time slots for each task and provides reminders and n…
Schedule	TimeMaster	TimeMaster is a schedule software application that helps users efficiently manage their time by providing a comprehensive task management system. Users can create and organize tasks, set priorities, allocate time slots, and track their progress. The software also offers a visual representation of the schedule, allowing users to easily view and manage their day. Additionally, TimeMaster enables us…
Schedule	ScheduleMate	ScheduleMate is a schedule software application that allows users to collaborate and streamline their schedules. Users can create and share their schedules with others, enabling effective coordination for team projects, group events, or family activities. ScheduleMate provides a user-friendly interface where users can input tasks, set deadlines or due dates, assign responsibilities to team member…
Schedule	ScheduleBuddy	ScheduleBuddy is a schedule software application designed to help individuals manage their social commitments effectively...
Schedule	TimePlan	TimePlan is a schedule software application that helps users plan and organize their time effectively. It allows users to create and manage tasks, set deadlines, allocate time slots, track their progress, and generate reports for productivity analysis.
Schedule	TimeTrack	TimeTrack is a schedule software application that helps individuals track and analyze their time usage. It allows users to log their activities, assign categories, and allocate time for each activity. Users can view detailed reports and visual representations of their time allocation to identify areas for improvement in productivity and time management.
Schedule	ScheduleTracker	ScheduleTracker is a schedule software application that helps individuals keep track of their daily activities and ensure they stay on schedule. It provides a user-friendly interface where users can input their tasks and allocate specific time slots for each task. ScheduleTracker also allows users to set reminders and notifications, ensuring they never miss an important deadline. Additionally, th…
Schedule	TimeScheduler	TimeScheduler is a schedule software application that combines task management and time blocking techniques to help users optimize their productivity and manage their time effectively. It allows users to create tasks, allocate specific time slots for each task, and set priorities. Users can also track their progress, receive reminders, and generate reports for productivity analysis. TimeScheduler…
Schedule	TaskPro	TaskPro is a schedule software application that focuses on helping individuals prioritize their tasks effectively. Users can input their tasks, set priorities based on importance or urgency, and allocate specific time slots for each task. The software provides reminders and notifications to ensure users stay on track with their prioritized tasks. TaskPro also offers a visual overview of the day, …
Schedule	TaskArranger	TaskArranger is a schedule software application designed to help individuals efficiently arrange and prioritize their tasks. It provides an intuitive interface where users can input their tasks and categorize them based on different criteria such as work, personal, or custom categories. The software allows users to allocate specific time slots for each task and provides reminders and notification…
Schedule	SchedulePlanner	SchedulePlanner is a schedule software application that focuses on helping individuals plan and organize their schedules effectively. It provides a user-friendly interface where users can input their tasks, set priorities, allocate time slots, and track their progress. SchedulePlanner also offers reminders and notifications to keep users on track with their tasks. Additionally, the software allow…
Schedule	ScheduleFocus	ScheduleFocus is a schedule software application that aims to help individuals stay focused and manage their time efficiently...
Schedule	TimeSync	TimeSync is a schedule software application that focuses on helping individuals synchronize their tasks and activities across different devices and platforms. It allows users to seamlessly manage their schedules by providing real-time updates and synchronization capabilities. Users can input their tasks, set priorities, allocate time slots, and track their progress. TimeSync also offers reminders…
Schedule	TimePlanPlus	TimePlanPlus is a schedule software application that enhances the functionality of TimePlan by incorporating additional features such as habit tracking and goal setting. Users can create and manage tasks, set deadlines, allocate time slots, track progress, and generate reports. It also allows users to track habits and set goals for improved productivity and time management.
Schedule	TaskMaster	TaskMaster is a schedule software application that aids individuals in efficiently managing their tasks and improving their productivity. It provides a user-friendly interface where users can input their tasks, set priorities, allocate specific time slots for each task, and track their progress. The software also offers reminders and notifications to keep users on track with their tasks. TaskMast…
Schedule	TaskOrganizer	TaskOrganizer is a schedule software application that aims to help individuals effectively organize and manage their tasks. Users can input their tasks, set priorities, allocate specific time slots, and track their progress. The software also offers reminders and notifications to keep users on track with their tasks. TaskOrganizer provides a visual representation of the schedule, allowing users t…
Schedule	ScheduleSync	ScheduleSync is a schedule software application that focuses on helping individuals synchronize their schedules across multiple devices and platforms. It allows users to seamlessly manage their tasks and activities by providing real-time updates and synchronization capabilities. Users can input their tasks, set priorities, allocate time slots, and track their progress. ScheduleSync also offers re…
Schedule	SchedulePlus	SchedulePlus is a schedule software application that focuses on helping individuals effectively plan and organize their schedules by integrating task management and time tracking features. Users can input their tasks, set priorities, allocate specific time slots, track their progress, and analyze their productivity through comprehensive reports and visual representations of their schedule.
Schedule	Organizer Pro	Organizer Pro is a schedule software application that helps individuals efficiently organize and manage their tasks, events, and appointments. Users can input their tasks and events, set deadlines, allocate specific time slots, and categorize them based on different criteria. The software provides a user-friendly interface with customizable views and options, reminders, notifications, and the abi…
Schedule	FocusTime	FocusTime is a schedule software application that helps individuals improve their focus and productivity by implementing the Pomodoro Technique. It allows users to set a timer for work intervals and breaks, helping them maintain a concentrated work schedule. Users can customize the duration of work intervals and breaks according to their preferences. FocusTime also provides notifications and remi…
Schedule	ScheduleAssistant	ScheduleAssistant is a schedule software application that aims to help individuals efficiently manage their schedules and improve productivity...
Schedule	TaskTracker	TaskTracker is a schedule software application that helps individuals track and manage their tasks efficiently. It allows users to input their tasks, set priorities, allocate specific time slots for each task, and track their progress. TaskTracker also provides reminders and notifications to keep users on track with their tasks. It offers a visual representation of the schedule, allowing users to…
Schedule	ScheduleSmart	ScheduleSmart is a schedule software application that utilizes machine learning algorithms to intelligently analyze and optimize individuals
Schedule	ScheduleCompanion	ScheduleCompanion is a schedule software application that aims to help individuals effectively manage their schedules by providing personalized recommendations and insights. It allows users to input their tasks, set priorities, allocate specific time slots, and track their progress. ScheduleCompanion utilizes machine learning algorithms to analyze user patterns and preferences, making intelligent…
Schedule	FlexiSchedule	FlexiSchedule is a schedule software application that allows users to create flexible schedules based on their availability and preferences. It provides a user-friendly interface where users can input their tasks, set priorities, and allocate time slots. FlexiSchedule also offers customization options, allowing users to define their work hours, breaks, and recurring activities. The software provi…
Schedule	ScheduleAssistant	ScheduleAssistant is a schedule software application that aims to help individuals efficiently manage their schedules and improve productivity.
Schedule	ScheduleFocus	ScheduleFocus is a schedule software application that aims to help individuals stay focused and manage their time efficiently. It provides users with a distraction-free interface where they can input their tasks, set priorities, allocate specific time slots, and track their progress. The software also offers customizable focus modes that block distractions such as social media notifications and i…
Schedule	ScheduleFlex	ScheduleFlex is a schedule software application that allows users to create and manage flexible schedules based on their availability and preferences. It provides a user-friendly interface where users can input their tasks, set priorities, and allocate time slots. ScheduleFlex offers customization options, such as defining work hours, breaks, and recurring activities, to accommodate users
Schedule	TimeOptimizer	TimeOptimizer is a schedule software application that helps individuals optimize their time and maximize their productivity. It provides users with a user-friendly interface where they can input their tasks, set priorities, allocate specific time slots, and track their progress. TimeOptimizer utilizes intelligent algorithms to analyze task dependencies, deadlines, and user preferences, making rec…
Science	Science Explorers	An interactive software to teach elementary school students about various scientific concepts through fun and engaging activities
Science	Knowledge Tracker	The Knowledge Tracker software is designed to help users track and organize their scientific knowledge...
Science	Science Simulator	A software that allows users to simulate scientific experiments and phenomena through interactive simulations, providing a virtual environment to design and conduct experiments, adjust variables, and observe outcomes.
Science	Measurement Converter	This software is designed to convert measurements from one unit to another. Users can input a value and select the desired conversion, such as converting kilometers to miles or grams to ounces. The software will provide accurate conversions and display the result to the user.
Science	Science Flashcards	Create a software platform for creating and reviewing interactive science flashcards.
Science	Science Grapher	An interactive graphing software for scientific data analysis
Science	Science Facts	A software that provides interesting science facts to users
Science	Graph Analyzer	A software application for analyzing different types of graphs, performing graph algorithms and calculations, and visualizing the results.
Science	SimuChem	SimuChem is a software application that simulates chemical reactions and predicts their outcomes based on the input of reactants and reaction conditions. It provides a visual representation of the reaction process, allowing users to manipulate reaction parameters and observe real-time changes in molecular structures and energy profiles. SimuChem incorporates basic principles of quantum mechanics …
Science	Science Reference Guide	Provide a comprehensive and easy-to-use reference guide for scientific disciplines with concise explanations, definitions, and diagrams.
Science	AstroViewer	AstroViewer is a software application that allows users to explore and visualize the night sky. It provides a comprehensive database of celestial objects such as stars, planets, and constellations. Users can search for specific objects, view their positions in real-time based on their current location, and learn more about them through detailed information and interactive visuals. AstroViewer als…
Science	Solar System Explorer	A software application that allows users to explore our solar system in an interactive and immersive way. Users can navigate through planets, moons, and other celestial bodies, zoom in for close-up views, simulate day and night cycles, planetary orbits, and view historical events like eclipses. It provides a visually appealing and educational tool for understanding the composition and dynamics of…
Science	Scientific Calculator	Perform various scientific calculations including algebraic, trigonometric, exponential, and logarithmic functions.
Science	Science Question Solver	Step-by-step science question solver providing explanations and solutions.
Science	Space Explorator	Explore and learn about celestial bodies in our solar system through an interactive 3D map. Gather information, take quizzes, and access educational resources.
Science	MiniLab Assistant	A software application that assists science students in conducting experiments in a virtual laboratory setting, offering simulated experiments, tutorials, and real-time feedback.
Science	Particle Collider Simulation	Simulate particle behavior in a collider to study and analyze various particle interactions.
Science	Science Library	A software application that serves as a digital library for scientific research papers and publications. It allows users to search, access, and download a wide range of scientific articles and journals from various fields of study. The library also provides categorization and sorting options to help users find relevant research papers easily. Additionally, users can save and organize their favori…
Science	Science Fact Checker	Verify the accuracy of scientific claims using natural language processing and data analysis techniques.
Science	Science Explore	This software provides a virtual laboratory where users can conduct various scientific experiments and explore different concepts in physics, chemistry, and biology. It offers a wide range of simulations and interactive models to assist users in understanding scientific principles.
Science	Science Discovery	Science Discovery is a standalone application that allows users to explore and learn about various scientific phenomena through interactive simulations and experiments. It provides a platform for users to actively engage in scientific discovery by conducting experiments and simulations. The software does not rely on real-world data sources and is designed to be user-friendly and easy to navigate.
Science	Science Quiz	Design and develop a software application for conducting interactive science quizzes with multiple-choice questions and performance tracking.
Science	Science Notes	Science Notes is a software application that allows users to create and organize digital notes for various scientific subjects. Users can create separate notebooks for different subjects, add notes with text, images, and diagrams, and easily search and access their notes whenever needed. The software provides a user-friendly interface with features like highlighting, bookmarking, and tagging for …
Science	Physics Simulations	A software that allows users to simulate various physical phenomena and experiments. Users can create virtual environments, set up initial conditions, and observe the dynamics of objects based on the laws of physics.
Science	Science Concept Visualizer	The Science Concept Visualizer is a software that allows users to visualize complex scientific concepts in a simplified and interactive way. It provides interactive 3D animations and simulations to help users better understand scientific principles. Users can explore various scientific phenomena through the software, such as atomic interactions, ecosystems, chemical reactions, and astronomical ev…
Science	Science Aid	A software that provides assistance and guidance for scientific experiments
Science	ScienceNote	ScienceNote is a software application designed to help scientists and researchers organize and manage their notes and findings from experiments and studies. It provides a user-friendly interface where users can create digital notebooks, take detailed notes, and categorize information based on different scientific disciplines or projects.
Science	Science Notebook	Providing a digital notebook platform for scientists and researchers to organize, document, and share their experiments and findings.
Science	Science Experiment Planner	A software application designed to assist science students and researchers in planning and organizing their experiments.
Science	Science Analyzer	Science Analyzer is a software application that allows users to analyze scientific data and generate comprehensive reports. Users can input their data, select from a variety of analysis tools and statistical tests, and visualize the results through graphs and charts. The software also provides options for data preprocessing, outlier detection, and data transformation. Science Analyzer aims to str…
Security	SecureGuard	SecureGuard is a security software application that provides real-time monitoring and protection for personal computers, constantly scanning for malware, viruses, and unauthorized access attempts. It alerts the user and takes measures to neutralize threats. It includes a firewall and password manager to ensure data privacy and security.
Security	ThreatAlert	Security software application that monitors and identifies potential threats to a system or network. It analyzes network traffic, system logs, and user behavior to detect and alert users about any suspicious activities or vulnerabilities.
Security	Security Monitor	A security software that constantly monitors and analyzes the network traffic for any suspicious or unauthorized activities. It provides real-time notifications and alerts when it detects any potential security threats, such as unauthorized access attempts or anomalous data transfers. The software also keeps a log of all network activities for auditing purposes.
Security	Intrusion Detection System	A software application that monitors network traffic for potential malicious activities and identifies intrusions or unauthorized access attempts. It analyzes network packets, looks for suspicious patterns, and raises alerts when it detects any unusual or suspicious behavior.
Security	Virus Protector	Virus Protector is a security software application that scans and removes viruses, malware, and other malicious threats from computer systems. It provides real-time protection by constantly monitoring system activities and files, and it also offers scheduled and on-demand scanning options. Virus Protector keeps the system secure by detecting and eliminating any potential security risks, ensuring …
Security	SafeNet	SafeNet is a security software application that provides secure storage for sensitive data by encrypting it and storing it in a virtual vault.
Security	BreachAlert	BreachAlert is a security software application that monitors and detects data breaches in real-time. It scans system logs, network traffic, and user activities to identify any unauthorized access or potential security breaches. It raises immediate alerts, allowing users to take prompt action to safeguard their sensitive information and prevent further unauthorized access. BreachAlert also provide…
Security	SecureNet	SecureNet is a security software application that provides secure and encrypted communication channels for internet browsing and online activities. It protects user
Security	ThreatBlocker	ThreatBlocker is a security software application that proactively blocks and prevents potential threats from infiltrating a system or network. It analyzes incoming network traffic, system processes, and file downloads to identify and block any suspicious or malicious activities. ThreatBlocker utilizes a robust set of predefined rules and algorithms to detect and neutralize threats before they can…
Security	SafeScan	SafeScan is a security software application that provides comprehensive scanning and analysis of files and applications on a personal computer. It scans for potential security threats such as malware, ransomware, and suspicious files, and provides real-time alerts to the user. SafeScan also includes a file integrity checker that verifies the integrity of system files and alerts the user if any ch…
Security	Password Protector	Password Protector is a security software application that securely stores and manages passwords for various online accounts. It utilizes strong encryption algorithms to protect user passwords from unauthorized access. The software allows users to generate unique and complex passwords for each account and automatically enters them when needed. It also provides an option to synchronize passwords a…
Security	SecurityGuard	SecurityGuard is a security software application that provides real-time monitoring and protection for mobile devices, constantly scanning for malware, viruses, and unauthorized access attempts. It alerts the user and takes measures to neutralize threats. It includes a secure browsing feature and password manager to ensure data privacy and security.
Security	SecureShield	SecureShield is a security software application that provides advanced protection against phishing attacks. It scans URL links and email content to detect potential phishing attempts and alerts users to avoid accessing malicious websites or providing sensitive information. The software includes a browser extension that displays real-time phishing threat indicators to help users make informed deci…
Security	SecurifyPro	SecurifyPro is a security software application that provides real-time monitoring and protection for personal computers against potential cybersecurity threats. It utilizes advanced algorithms to analyze network traffic, system logs, and user behavior to detect and alert users about any suspicious activities or vulnerabilities. The software also offers proactive measures to neutralize threats, su…
Security	SecurityShield	SecurityShield is a security software application that provides real-time monitoring and protection for IoT devices. It constantly scans for vulnerabilities, unauthorized access attempts, and potential threats that can compromise the security of IoT devices and their connected networks. It includes a secure communication channel and encryption features to ensure the privacy and integrity of data …
Security	SecurePort	SecurePort is a security software application that provides real-time monitoring and protection for network ports, ensuring that only authorized connections are established. It analyzes incoming and outgoing network traffic to detect any unauthorized access attempts or suspicious activities. SecurePort also includes a firewall feature that blocks incoming connections from unknown sources, further…
Security	SecureScan	SecureScan is a security software application that provides comprehensive scanning and analysis of files and applications on a personal computer. It scans for potential security threats such as malware, ransomware, and suspicious files, and provides real-time alerts to the user. SecureScan also includes a file integrity checker that verifies the integrity of system files and alerts the user if an…
Security	SecureDetect	SecureDetect is a security software application that uses machine learning algorithms to detect and identify potential security threats in real-time. It analyzes network traffic patterns, system logs, and user behavior to detect any suspicious activities or anomalies. When a potential threat is identified, SecureDetect raises immediate alerts and takes measures to neutralize the threat. It also k…
Security	SecurityWatcher	SecurityWatcher is a security software application designed to monitor and detect suspicious activities on a computer system. It constantly scans processes, files, and system logs to identify any potential security threats, such as unauthorized access attempts, malware, or suspicious file changes. The software provides real-time alerts to users and offers options to quarantine or remove detected …
Security	ThreatHunter	ThreatHunter is a security software application that specializes in proactive threat hunting within a computer network. It continuously monitors network traffic, system logs, and user behavior to detect any potential security breaches or malicious activities. The software utilizes advanced algorithms and machine learning techniques to identify patterns indicative of threats. When a potential thre…
Security	PrivacyShield	PrivacyShield is a security software application that provides comprehensive privacy protection for personal computers. It encrypts sensitive data and files, securely deletes browsing history and temporary files, and offers a privacy-focused browser extension that blocks trackers and ads. It also includes a secure password manager for managing and generating strong passwords. PrivacyShield ensure…
Security	CyberDefender	CyberDefender is a security software application that detects and defends against cyber threats by proactively monitoring network traffic and system logs. It utilizes artificial intelligence algorithms to identify potential security breaches, malware attacks, and suspicious activities in real-time. CyberDefender provides immediate alerts and takes necessary actions to neutralize threats, ensuring…
Security	ThreatAnalyzer	ThreatAnalyzer is a security software application that utilizes advanced machine learning algorithms to analyze and classify potential security threats in real-time. It continuously monitors network traffic, system logs, and user behavior to detect any suspicious activities or anomalies. When a potential threat is identified, ThreatAnalyzer raises immediate alerts and provides detailed informatio…
Security	ThreatInspector	ThreatInspector is a security software application that analyzes and inspects files and applications on a personal computer for potential security threats. It utilizes machine learning algorithms to detect and classify malware, ransomware, and other malicious files in real-time. ThreatInspector provides users with detailed reports and recommendations on how to mitigate the identified threats. It …
Security	SecureTrack	SecureTrack is a security software application that provides real-time tracking and monitoring of user
Security	SafeGuard	SafeGuard is a security software application that provides real-time monitoring and protection for personal computers and mobile devices. It continuously scans for malware, viruses, and unauthorized access attempts, while also offering secure browsing features and password management functionality to ensure data privacy and security. SafeGuard includes a robust firewall and encryption capabilitie…
Security	SecureCam	SecureCam is a security software application that provides real-time monitoring and protection for surveillance cameras. It utilizes advanced video analysis algorithms to detect suspicious activities or potential security breaches, such as unauthorized access attempts or tampering with the cameras. SecureCam raises immediate alerts and provides live video feeds to users, allowing them to take pro…
Security	SecurityAnalyzer	SecurityAnalyzer is a security software application that performs comprehensive vulnerability assessments and audits on computer systems. It scans the system for potential security weaknesses and provides detailed reports and recommendations to mitigate those vulnerabilities. The software analyzes network configurations, system settings, and application vulnerabilities to identify potential entry…
Security	Security Monitor	SecurityMonitor is a security software application that provides real-time monitoring and analysis of network traffic to detect and prevent potential security threats. It continuously scans for suspicious activities, unauthorized access attempts, and anomalous data transfers. The software raises immediate alerts when it identifies any potential security breaches and provides recommendations for m…
Security	ShieldGuard	ShieldGuard is a security software application that provides real-time monitoring and protection for personal computers and mobile devices. It detects and blocks potential threats such as malware, viruses, and unauthorized access attempts. Additionally, ShieldGuard includes a secure browsing feature that protects users from malicious websites and phishing attacks. It also offers a password manage…
Shooter Game	Zombie Fortress	A shooter game where players defend a fortress from waves of attacking zombies. The game includes various weapons, multiplayer mode, and upgrades to enhance the gameplay experience.
Shooter Game	Target Shooter	A target shooter game where players shoot moving targets as accurately as possible within a time limit. Earn points for accuracy and speed. Compete with friends for the highest score.
Shooter Game	Wild West Shootout	A shooter game where players step into the boots of a cowboy in the Wild West. Players can engage in intense shootouts with outlaws, protect innocent townspeople, and participate in duels. Includes various weapons, such as revolvers and shotguns. Offers different game modes, including single-player missions and multiplayer challenges.
Shooter Game	BattleZone	BattleZone is a shooter game software that offers intense tank battles in a virtual arena. Players engage in real-time battles, eliminating enemy tanks while strategically maneuvering to survive. The game features different tank types, power-ups, and a multiplayer mode for competitive gameplay.
Shooter Game	Battlefield Showdown	A multiplayer shooter game where players engage in fast-paced battles on various dynamic battlefields, utilizing an array of weapons and special abilities to defeat opponents and capture objectives.
Shooter Game	Time Crisis	A shooter game where players take on the role of an elite agent on a mission to save the world from a terrorist organization. Players must navigate through different levels, taking cover and strategically shooting enemies to progress. The game offers a variety of weapons, explosive set-pieces, and boss battles for an action-packed experience.
Shooter Game	Space Shooter	A shooter game where players pilot a spaceship and defend the galaxy from an alien invasion. Navigate through asteroid fields, engage in space battles, defeat boss enemies, and earn power-ups. Customize your spaceship and progress through multiple levels of increasing difficulty.
Shooter Game	Space Defense	Space Defense is a shooter game where players defend Earth from invading aliens. Strategically maneuver your spaceship, shoot down enemy ships, and protect important targets. Equip your ship with various weapons, power-ups, and upgrades. Save humanity from the alien threat!
Shooter Game	Sniper Assassin	Sniper Assassin is a shooter game where players take on the role of a skilled sniper on covert missions. Players must carefully aim and shoot high-value targets from long distances, avoiding detection and completing the objectives within a time limit. The game offers a variety of sniper rifles with different features, such as adjustable scopes and silenced shots, to enhance the sniper experience.…
Shooter Game	Secret Agent Showdown	Secret Agent Showdown is a shooter game where players assume the role of a highly skilled secret agent on a mission to infiltrate enemy bases and eliminate high-profile targets. Players must utilize stealth, cunning, and precision shooting to complete the objectives successfully. The game offers a variety of spy gadgets such as silenced pistols, throwing knives, and grappling hooks to aid players…
Shooter Game	Arena Mayhem	Arena Mayhem is a shooter game where players engage in intense battles in a closed arena. Players must strategically navigate the arena, utilizing different weapons and power-ups to eliminate opposing players and become the last one standing. The game features fast-paced gameplay, different arenas with unique layouts, and customizable characters with various abilities.
Shooter Game	Alien Invasion	Alien Invasion is a shooter game where players defend Earth from invading aliens. Strategically navigate through various cityscapes, forests, and underground tunnels, eliminating alien creatures. Protect crucial installations and engage in challenging boss battles. Experience intense action across multiple levels of increasing difficulty.
Shooter Game	Bubble Blaster	A shooter game where players control a bubble blaster and shoot bubbles to pop colored bubbles falling from the top. Clear as many bubbles as possible before they reach the bottom. Includes power-ups, combo bonuses, and increasing difficulty levels.
Shooter Game	Battle Royale Blitz	Battle Royale Blitz is a shooter game where players are dropped into a large arena and must fight to be the last one standing. The game features a shrinking playable area, scavenging for weapons and equipment, multiple playable characters, and both solo and team-based gameplay. It does not rely on VR, AI, online function, server, engine, recommendations system, or database.
Shooter Game	Monster Hunter	In this shooter game, players take on the role of a skilled monster hunter in a fantasy world. Players must explore vast landscapes, track down dangerous monsters, and engage in thrilling battles to defeat them. The game offers a variety of weapons, armor, and abilities for players to customize their hunter and strategically approach each encounter. As players progress, they can unlock new areas,…
Shooter Game	Sniper Elite	In Sniper Elite, players become skilled snipers in World War II missions. Carefully plan your shots, considering wind speed and bullet drop, to eliminate high-value targets and gather crucial intelligence. Experience realistic ballistics, adjustable scopes, and a variety of sniper rifles to enhance your sniper skills.
Shooter Game	Battlezone Strike	In Battlezone Strike, players engage in fast-paced tank battles in a virtual arena. Maneuver your tank strategically, outsmart opponents, and destroy enemy tanks. With different tank types and power-ups, customize your tank to suit your play style. Complete single-player missions with increasing difficulty or challenge others in multiplayer battles.
Shooter Game	Sniper Squad	In Sniper Squad, players form a team of elite snipers on covert missions around the world. They must work together to take down high-profile targets with precision and stealth. The game offers a variety of missions in different locations, each requiring strategic planning and coordination to succeed. Players can choose from a range of sniper rifles and equipment, upgrade their skills, and unlock …
Shooter Game	Survival Showdown	The software, named Survival Showdown, is a shooter game that puts players in a fierce battle for survival against waves of enemies. Armed with a variety of weapons and power-ups, players must eliminate enemies and stay alive as long as possible in an ever-shrinking arena. The game offers intense action, strategic gameplay, and thrilling challenges as players strive to beat their own high scores.
Shooter Game	Sharpshooter Showdown	Sharpshooter Showdown is a shooter game where players showcase their marksmanship skills by competing in various shooting challenges. Players must demonstrate accuracy and speed as they aim and shoot at different targets, such as bullseyes, moving objects, and pop-up targets. The game offers different levels of difficulty, competitive leaderboards, and the ability to unlock new shooting ranges an…
Shooter Game	Sniper Challenge	A shooter game where players are presented with various sniper challenges, such as shooting moving targets, eliminating multiple targets within a time limit, and hitting specific targets with limited ammunition. The game offers realistic ballistics, adjustable scopes, and a range of sniper rifles to test players
Shooter Game	Metal Assault	Metal Assault is a shooter game where players become part of an elite military unit tasked with taking down a corrupt organization. Players must navigate through various levels, engage in intense firefights, and eliminate enemies using a wide range of weapons and explosives. The game features realistic graphics, challenging missions, and a compelling storyline that unfolds through cinematic cutsc…
Shooter Game	Sharpshooter Defense	In Sharpshooter Defense, players take on the role of a skilled sharpshooter defending a military base from waves of enemy attacks. Players must strategically position themselves and aim precisely to eliminate enemies and protect the base. The game offers various sniper rifles with adjustable scopes, power-ups, and upgrades to enhance the player
Shooter Game	Space Invaders	A classic shooter game where players control a spaceship and defend Earth from waves of invading alien spacecraft. Players must navigate their ship and shoot down the aliens, avoiding their projectiles. The game features different types of aliens with varying behavior patterns, power-ups for enhanced abilities, and increasing difficulty levels as the player progresses.
Shooter Game	Sniper Squad Showdown	Sniper Squad Showdown is a shooter game where players form a team of elite snipers on immersive covert missions around the world. Players must work together to eliminate high-value targets with precision and stealth. The game offers a variety of challenging missions in different locations, each requiring strategic planning and coordination among players. Players can choose from a range of sniper …
Shooter Game	Carnival Shooter	Carnival Shooter is a shooter game where players are transported to a vibrant carnival filled with various shooting challenges. Players must test their marksmanship skills by shooting at moving targets, knocking down bottles, and popping balloons to earn points. The game offers different carnival-themed levels, each with its unique challenges and rewards. Players can unlock new shooting ranges, u…
Shooter Game	Air Combat Squadron	Air Combat Squadron is a shooter game where players take control of powerful fighter jets and engage in intense aerial dogfights. Players must strategically maneuver their aircraft, unleash a variety of weapons, and outmaneuver enemy planes to emerge victorious. The game offers different mission scenarios, customizable aircraft with unique abilities, and challenging boss battles.
Shooter Game	Warzone Sniper	In Warzone Sniper, players take on the role of a skilled sniper deployed in a war-torn city. Their mission is to eliminate high-value targets from strategic vantage points, gather intelligence, and support their squad on the ground. Players must carefully plan their shots, consider the environment and wind conditions, and avoid detection to complete their objectives. The game offers realistic bal…
Shooter Game	Target Training	Target Training is a shooter game application that focuses on improving players
Shooter Game	Jet Combat	Engage in high-speed aerial dogfights as a skilled fighter pilot. Maneuver your jet, unleash a variety of weapons, and outmaneuver enemy aircraft to emerge victorious. The game offers different mission scenarios, customizable jets with unique abilities, and challenging boss battles.
Shopping	Smart Shopper	Smart Shopper helps users make informed purchasing decisions by providing real-time product comparisons, reviews, shopping list creation, and personalized suggestions.
Shopping	Wishlist Tracker	The Wishlist Tracker is a software that helps users keep track of the items they want to purchase in the future.
Shopping	Shopping Buddy	The Shopping Buddy software is a personalized shopping assistant that recommends products, helps create shopping lists and budgets, and provides notifications for deals and discounts. It includes a barcode scanner for accessing product information and reviews. Aimed at enhancing shopping experiences, it streamlines decision-making and saves users time and money.
Shopping	EasyShop	A user-friendly shopping list organization software for managing and categorizing items efficiently.
Shopping	Savings Saver	Savings Saver is a software that helps users track their savings goals and provides personalized suggestions on how to save money. It allows users to set specific savings targets and provides tips and strategies for achieving those goals. It also includes a budgeting feature that helps users track their expenses and identify areas where they can cut back to save more. Savings Saver aims to empowe…
Shopping	Price Comparator	The Price Comparator software allows users to compare prices of products from different online retailers. It provides real-time price information, product descriptions, and allows users to filter and sort results based on their preferences. With Price Comparator, users can easily find the best deals on the products they want to purchase.
Shopping	Shopping Planner	The Shopping Planner software is designed to help users plan their shopping trips efficiently. It allows users to create customizable shopping lists, categorize items, and set reminders for upcoming trips. The software also includes a map feature that suggests the most optimized route for the shopping trip, minimizing travel time and maximizing convenience. Users can add items manually or import …
Shopping	Shopper Friends	Shopper Friends is a social shopping app that allows users to connect with friends, create shopping lists, share product recommendations, and organize group shopping outings. It includes features like in-app messaging and real-time updates on friends
Shopping	Smart Receipt	Smart Receipt is a software application that allows users to digitize and organize their receipts for easy access and management. Users can simply take a picture of their receipts or upload the digital receipt files, and the software will automatically extract relevant information such as date, merchant, and total amount. The software provides a searchable database of receipts, allowing users to …
Shopping	FastCart	FastCart is a shopping software that allows users to quickly create and manage their shopping lists.
Shopping	Discount Finder	Discount Finder is a shopping software that helps users find discounts and deals for products across various online retailers.
Shopping	Budget Saver	Budget Saver is a shopping software that helps users save money by providing recommendations and tips on how to shop on a budget. It allows users to set a budget for their shopping trips and tracks their spending to ensure they stay within their budget. The software also provides suggestions on cost-effective alternatives for products and helps users find the best deals and discounts available. I…
Shopping	ShopStyle	ShopStyle is a shopping software application that allows users to discover and shop for fashion items from various online retailers. It provides a curated collection of clothing, accessories, and footwear from popular brands, and users can browse through the products based on their preferences and style. ShopStyle offers a seamless shopping experience by providing detailed product information, cu…
Shopping	Price Alert Plus	Price Alert Plus is a shopping software application that helps users save money by providing real-time price alerts for products they are interested in purchasing. Users can set price thresholds for specific products and receive notifications when the prices drop below their desired levels. The software also allows users to compare prices across different online retailers and provides insights on…
Shopping	ShopStyle Finder	ShopStyle Finder is a shopping software application that helps users discover and shop for various products available from different online retailers. It focuses on providing a personalized shopping experience, where users can browse and filter through a wide range of products based on their preferences, style, and budget. ShopStyle Finder offers detailed product information, customer reviews, an…
Shopping	CustomFit	CustomFit is a shopping software application that helps users find clothing and accessories that are tailored to their specific body measurements and personal style. It provides a seamless shopping experience by offering a curated collection of products that are available in various sizes and customizable options. Users can input their body measurements and style preferences, and the software wil…
Shopping	ShopSaver	ShopSaver is a shopping software application that helps users save money by providing real-time price comparisons and discounts. It allows users to search for specific products and compares prices from different online retailers. ShopSaver also provides notifications for deals and discounts on selected products. Users can create a shopping list and the software will suggest budget-friendly altern…
Shopping	ShopSmart	ShopSmart is a shopping software application that helps users make informed purchasing decisions by providing product recommendations based on price, quality, and user reviews. It allows users to search for specific products or browse through categories, and the software will suggest the best options based on the user
Shopping	PriceWatch	PriceWatch is a shopping software application that allows users to track and monitor the prices of their preferred products from online retailers. Users can select specific products and set price thresholds, and the software will notify them when the prices drop below their desired levels. PriceWatch also provides a historical price chart for each product, allowing users to visualize price trends…
Shopping	Sale Notifier	SaleNotifier is a shopping software application that helps users find the best deals and discounts available for their desired products. It allows users to create a wishlist of products they want to purchase and tracks the prices of those products across different online retailers. SaleNotifier sends real-time notifications to users when the prices of their wishlist items drop or when there are a…
Shopping	Shopping Organizer	Shopping Organizer is a software application that helps users keep track of their shopping items and streamline their shopping experience. It allows users to create customized shopping lists, categorize items, and set reminders for upcoming shopping trips. The software provides a user-friendly interface where users can add or remove items from their lists and easily update quantities or notes. Wi…
Shopping	QuickCart Organizer	QuickCart Organizer is a shopping software application that helps users manage and organize their shopping lists efficiently. It allows users to create customizable shopping lists, categorize items, and set reminders for upcoming trips. The software also includes a barcode scanner feature for adding products to the list and accessing product information. QuickCart Organizer aims to streamline the…
Shopping	Time Saver	Time Saver is a user-friendly shopping software application that allows users to create and manage shopping lists effortlessly. Users can easily add items to the list, categorize them, and set reminders for upcoming shopping trips. The software provides a simple and intuitive user interface, making it easy for users to stay organized and never forget essential items while shopping. With Time Save…
Shopping	Price Comparison Assistant	The Price Comparison Assistant is a shopping software application that helps users find the best prices for products across different online retailers. It allows users to search for specific products and provides real-time price comparisons. The software also includes features such as product descriptions, customer reviews, and the ability to filter and sort results based on user preferences. Wit…
Shopping	ShopSync	ShopSync is a shopping software application that allows users to synchronize their shopping lists across multiple devices. It enables users to create and manage their shopping lists on a smartphone, tablet, or computer, and automatically updates the lists in real-time. ShopSync also provides the ability to share shopping lists with family or friends, allowing them to collaborate and make joint de…
Shopping	ShopSearch	ShopSearch is a shopping software application that helps users find products quickly and efficiently. It allows users to search for specific products or browse through categories to discover new items. ShopSearch provides relevant product information, customer reviews, and the ability to compare prices from different online retailers. The software also includes a user-friendly interface that allo…
Shopping	ShopPal	ShopPal is a shopping software application that helps users discover and save their favorite products from online retailers. It allows users to create personalized collections of products they are interested in, track price changes, and receive notifications when there are discounts or deals available. ShopPal also provides detailed product information, customer reviews, and the ability to compar…
Shopping	TrendTracker	TrendTracker is a shopping software application that helps users discover and stay updated with the latest fashion trends. It provides curated collections of trendy clothing, accessories, and footwear from popular brands. Users can browse through the collections, view product details, and make purchases directly from the app. TrendTracker also offers personalized recommendations based on user pre…
Shopping	ShopStyle Match	ShopStyle Match is a shopping software application that helps users find fashion items that match their existing wardrobe. Users can upload photos of their clothing pieces or manually enter details about their wardrobe items, such as colors, styles, and patterns. The software will then suggest complementary fashion items available from various online retailers, allowing users to easily create coh…
Shopping	ShopConnect	ShopConnect is a shopping software application that helps users connect and collaborate with their friends while shopping. It allows users to create group shopping lists, share product recommendations, and communicate in-app. ShopConnect also includes a real-time chat feature for seamless communication between friends and the ability to divide and assign shopping tasks. With ShopConnect, users ca…
Simulation Game	Space Exploration Simulator	A space exploration simulator that allows players to build and upgrade spaceships, research technologies, and establish colonies on different planets. Engage in interstellar battles and negotiations while exploring a simulated universe with its own unique set of planets, civilizations, and resources.
Simulation Game	City Planner	City Planner is a simulation game software that allows players to build and manage their own virtual cities. Players can design and construct various buildings, including residential, commercial, and industrial structures, and strategically plan the layout of roads, parks, and other amenities. They must balance the needs of the citizens, manage resources effectively, and make decisions to ensure …
Simulation Game	Virtual Zoo Tycoon	A simulation game where players can build and manage their own virtual zoos, including designing enclosures, selecting animals, hiring staff, and ensuring the well-being and happiness of both visitors and animals.
Simulation Game	Roleplay Kingdom	Roleplay Kingdom is a simulation game where players can create and manage their own virtual kingdom. They can build structures, cultivate resources, train an army, form alliances, and engage in diplomacy with other players or AI-controlled kingdoms. The game provides a detailed world map where players can explore, discover new territories, and interact with various characters and events. The ulti…
Simulation Game	Time Travel Adventures	A simulation game that allows players to embark on thrilling and educational journeys through different time periods. Players can explore ancient civilizations, witness historical events, and interact with famous figures, all while learning about history and its impact on the present.
Simulation Game	Farm Life Simulator	Farm Life Simulator is a simulation game where players can experience the joys and challenges of running their own virtual farm. Players will start with a small plot of land and gradually expand their farm by planting crops, raising animals, and managing resources effectively. The game will simulate the seasons, weather conditions, and market demands, providing a realistic farming experience.
Simulation Game	Fantasy Town Builder	Fantasy Town Builder is a simulation game software that allows players to create and manage their own virtual fantasy towns. Players can design and construct various buildings, including magical shops, taverns, and enchanting structures, and strategically plan the layout of streets, parks, and landmarks. They must cater to the needs of their magical inhabitants, manage resources effectively, and …
Simulation Game	Ocean Exploration Adventure	Ocean Exploration Adventure is a simulation game software that immerses players in the underwater world...
Simulation Game	Wildlife Sanctuary Manager	The Wildlife Sanctuary Manager is a simulation game software where players can build and manage their own virtual wildlife sanctuary. They will be responsible for creating habitats, selecting and managing different species of animals, maintaining the ecosystem balance, and ensuring the well-being and conservation of the wildlife population.
Simulation Game	Theme Park Manager	A simulation game where players can build and manage their own virtual theme parks. Players can design and construct various attractions, including roller coasters, water slides, and carnival games. They will also be responsible for managing staff, setting ticket prices, and ensuring customer satisfaction. The game will simulate the park
Simulation Game	Virtual Restaurant Simulator	A simulation game that allows players to create and manage their own virtual restaurants, focusing on designing menus, hiring staff, attracting customers, and balancing quality and profits. The game provides challenges and scenarios to test the player
Simulation Game	Space Colony Builder	A simulation game software that allows players to establish and manage their own colonies on different planets in outer space. Players will have the opportunity to build and upgrade structures, such as living quarters, research labs, and resource extraction facilities, to ensure the survival and growth of their colony. They must also manage resources effectively, make strategic decisions, and nav…
Simulation Game	Fantasy Creature Creator	Fantasy Creature Creator is a simulation game software where players can unleash their creativity and design their own virtual fantasy creatures. Players can choose from a wide variety of creature parts, including heads, bodies, wings, tails, and more, to create unique and fantastical creatures. They can customize the colors, patterns, and textures of each part to bring their creations to life. T…
Simulation Game	Solar System Explorer	Solar System Explorer is a simulation game software where players can embark on a virtual journey through our solar system. They can pilot their own spacecraft, visit different planets and moons, and explore their unique landscapes and environments. Players can conduct scientific experiments, gather data, and learn about the various celestial bodies in our solar system. The game provides realisti…
Simulation Game	Underwater Treasure Hunter	Underwater Treasure Hunter is a simulation game software that allows players to embark on exciting underwater expeditions in search of hidden treasures. Players can dive into different oceanic locations, explore shipwrecks, caves, and coral reefs, and unravel ancient mysteries. They can use advanced equipment such as diving suits, underwater vehicles, and metal detectors to assist their treasure …
Simulation Game	Island Resort Simulator	Island Resort Simulator is a simulation game software that allows players to create and manage their own virtual island resorts. Players can design and construct various facilities, including luxurious hotels, beachside restaurants, and recreational activities such as water sports and spa services. They must cater to the needs and preferences of their guests, manage resources effectively, and mak…
Simulation Game	Rhythm Dance Studio	Rhythm Dance Studio is a simulation game software where players can create and manage their own virtual dance studio. Players will be able to design and decorate the studio, hire dance instructors, and offer a variety of dance classes to attract students. They must manage the schedule, advertise their studio, and ensure the satisfaction of their students to build a successful dance business.
Simulation Game	Safari Adventure	Safari Adventure is a simulation game software that allows players to experience the thrill of a virtual African safari. Players can explore vast landscapes, encounter a variety of wild animals, and participate in exciting safari activities such as wildlife photography, animal tracking, and conservation efforts. They must navigate through different terrains, manage limited resources, and make str…
Simulation Game	Virtual Animal Sanctuary	The Virtual Animal Sanctuary is a simulation game software that allows players to create and manage their own virtual wildlife sanctuaries. Players will be responsible for rescuing and caring for various species of animals, providing suitable habitats, and ensuring the well-being and conservation of the wildlife population.
Simulation Game	Animal Rescue Hero	Animal Rescue Hero is a simulation game software where players can rescue and care for abandoned and injured animals. Manage the operations of the rescue center, including fundraising, volunteer coordination, and community outreach. Make critical decisions to ensure the well-being and happiness of the animals under your care.
Simulation Game	Creature Evolution Simulator	A simulation game where players can observe and influence the evolution of virtual creatures by manipulating environmental factors and witnessing natural selection in action.
Simulation Game	Fantasy Pet Trainer	Fantasy Pet Trainer is a simulation game software where players can train and care for their own virtual fantasy pets. Players can choose from a variety of mythical creatures, such as dragons, unicorns, and phoenixes, and guide them through various training activities, including flying, racing, and battling. They must nurture their pets, improve their skills, and compete in tournaments to become …
Simulation Game	Festival Planner	Festival Planner is a simulation game software that allows players to create and manage their own virtual music festivals. Players can choose from a variety of genres, artists, and locations to curate their festival lineup. They must manage ticket sales, revenue, logistics, and the overall attendee experience to ensure the success and popularity of their festival. The game will provide challenges…
Simulation Game	Ancient Civilization Builder	Ancient Civilization Builder is a simulation game software where players can create and manage their own virtual ancient civilizations. Players will have the opportunity to build and upgrade structures, such as housing, temples, and marketplaces, to promote the growth and development of their civilizations. They must manage resources effectively, make strategic decisions, and navigate challenges …
Simulation Game	City Traffic Manager	City Traffic Manager is a simulation game software where players can take on the role of a city traffic manager. They will have the responsibility of designing and managing the road networks, traffic signals, and public transportation systems in a virtual city. Players must optimize traffic flow, reduce congestion, and ensure the safe and efficient movement of vehicles and pedestrians. The game w…
Simulation Game	Medieval Kingdom Builder	Medieval Kingdom Builder is a simulation game software where players can create and manage their own virtual medieval kingdoms. Players will have the opportunity to build and upgrade structures, such as castles, farms, and markets, to promote the growth and prosperity of their kingdom. They must manage resources effectively, make strategic decisions in diplomacy and warfare, and navigate challeng…
Simulation Game	Virtual Art Gallery	The Virtual Art Gallery is a simulation game software where players can curate and manage their own virtual art galleries...
Simulation Game	Space Colony Manager	The Space Colony Manager is a simulation game software that allows players to establish and manage their own colonies on different planets in outer space. Players will have the opportunity to build and upgrade structures, such as living quarters, research labs, and resource extraction facilities, to ensure the survival and growth of their colony. They must also manage resources effectively, make …
Simulation Game	Animal Adoption Adventure	Animal Adoption Adventure is a simulation game software where players take on the role of managing an animal adoption center. Players will rescue and care for abandoned and injured animals, provide medical care, and find suitable forever homes for them. They will also be responsible for managing the operations of the center, including fundraising, volunteer coordination, and community outreach. T…
Simulation Game	Fantasy Dungeon Delve	Fantasy Dungeon Delve is a simulation game software where players can create and explore their own virtual dungeons. Players will have the opportunity to design and populate their dungeons with traps, puzzles, and monsters. They can strategically place treasures and rewards to entice adventurers to delve into their dungeons. The game will provide challenges such as creating balanced dungeon layou…
SocialNetwork	ConnectionHub	A social networking platform for professionals to connect, network, and collaborate. Users can create profiles, search for and connect with other professionals, join groups, share content, participate in discussions, and discover career opportunities.
SocialNetwork	SocialConnect	A software application that facilitates networking and connection between people with similar interests and hobbies.
SocialNetwork	Meetup Planner	Meetup Planner is a social networking software application that allows users to create and organize meetups with like-minded individuals. Users can create events, set the date, time, and location, and specify the interests or activities associated with the meetup. Other users can search and join meetups based on their interests and location. The application also provides a messaging feature for u…
SocialNetwork	ConnectionChat	A social networking software application that allows professionals in the same industry to connect and chat with each other in real-time. Users can create profiles, search for other professionals based on industry, job title, or skills, and initiate private or group chat conversations. They can also share files, exchange contact information, and form professional relationships.
SocialNetwork	SocialBridge	A networking platform connecting students and recent graduates with industry professionals for mentorship and career guidance. Users can create profiles, search for professionals, and request mentorships. Professionals can accept or decline requests, and both parties can communicate through messaging. Users can access resources and participate in virtual career fairs.
SocialNetwork	SocialMatch	A social networking software application that helps individuals find and connect with potential romantic partners based on shared interests and compatibility.
SocialNetwork	ConnectionForum	An online platform for professionals to engage in industry-specific discussions, exchange knowledge and insights, and foster meaningful relationships.
SocialNetwork	GroupChat	GroupChat is a social networking software application that allows users to create and participate in group chats with individuals who share common interests or hobbies. Users can join existing groups or create their own and invite others to join. Each group chat has text and multimedia messaging capabilities, allowing users to share content, discuss various topics, and build connections within th…
SocialNetwork	SocialSkill	SocialSkill is a social networking software application designed to help individuals improve their social skills and build meaningful relationships. The app provides interactive exercises and resources to enhance communication, empathy, active listening, and other key social skills. Users can track their progress, set goals, and receive personalized feedback to help them in their social developme…
SocialNetwork	ConnectionFeed	ConnectionFeed is a social networking software application designed to enhance networking and collaboration within a specific industry...
SocialNetwork	ConnectMatch	ConnectMatch is a social networking software application that helps individuals find and connect with like-minded professionals for potential collaborations, partnerships, or business opportunities. Users can create profiles highlighting their skills, expertise, and interests. The application uses a matching algorithm to suggest relevant connections based on the user
SocialNetwork	SocialEvent	SocialEvent is a social networking software application that allows users to discover and join various local events and activities. Users can create profiles, browse through a list of upcoming events in their area, and RSVP to the ones they are interested in attending. They can also connect with other attendees of the same event, participate in discussions about the event, and share their experie…
SocialNetwork	ConnectHive	ConnectHive is a social networking software application that connects individuals passionate about beekeeping. Users can create profiles, search for other beekeepers, and share knowledge, tips, and beekeeping techniques. It also features a marketplace for buying and selling honey products and equipment.
SocialNetwork	EventConnect	EventConnect is a social networking software application that connects individuals interested in attending and organizing events. Users can create profiles, search for events based on their interests and location, RSVP to events, and connect with other attendees. They can also create their own events, specify the details such as date, time, location, and type of event, and invite others to join. …
SocialNetwork	SocialShare	SocialShare is a social networking software application that allows users to share and discover content with others. Users can create profiles, upload images, videos, or articles, and share them with their network. They can also explore and interact with content shared by others, such as liking, commenting, or saving content for later. SocialShare aims to foster a community where users can connec…
SocialNetwork	CommunityConnect	A social networking software application that connects individuals living in the same neighborhood or community. Users can create profiles, search for other users based on their location, and connect with their neighbors. The application allows users to share information about local events, services, and resources. It also provides a messaging feature for users to communicate and collaborate on c…
SocialNetwork	SocialRecipe	A social networking software application that connects individuals who are passionate about cooking and sharing recipes. Users can create profiles, browse through a collection of recipes shared by other users, save their favorite recipes, and share their own recipes with the community. The app allows users to search for recipes based on various criteria such as cuisine, dietary restrictions, or i…
SocialNetwork	SocialLivestream	SocialLivestream is a social networking software application that allows users to livestream and share their experiences with others in real-time. Users can create profiles, start a livestream, and broadcast their activities, events, or interests to their network of followers. Followers can join the livestream, interact through comments and reactions, and engage in discussions with the streamer a…
SocialNetwork	NetworkingCircle	NetworkingCircle is a social networking software application that focuses on connecting professionals within the same industry to foster collaboration and knowledge sharing.
SocialNetwork	SocialConnectivity	SocialConnectivity is a social networking software application that focuses on connecting individuals with shared experiences and hobbies. Users can create profiles, search for others based on their interests, and connect with like-minded individuals. The app allows users to join groups and participate in discussions related to their interests. They can also share content, such as articles, video…
SocialNetwork	SocialQuest	SocialQuest is a social networking software application that connects individuals who love participating in and creating scavenger hunts. Users can create profiles, design their own scavenger hunts by setting challenges, clues, and locations, and invite their friends or other users to participate. The app provides a platform for users to collaborate and engage in scavenger hunt activities, share …
SocialNetwork	PollConnect	A social networking software application that allows users to create and participate in polls on various topics. Users can create profiles, browse through a list of polls created by others, vote on the polls, and see the results. They can also create their own polls, specify the options and duration, and share them with their network. PollConnect aims to foster engagement and discussion among use…
SocialNetwork	SocialHelp	A social networking software application that connects individuals in need of assistance with those who are willing to offer help. Users can create profiles and specify the type of assistance they require, such as tutoring, gardening, pet sitting, or handyman services. Other users can search and browse through the requests for help, and offer their assistance based on their skills and availabilit…
SocialNetwork	SocialLearn	A social networking software application that connects individuals with a passion for learning. Users can create profiles, specify their areas of interest or expertise, and connect with like-minded learners. The application provides a platform for users to join study groups, share educational resources, participate in online courses or webinars, and engage in discussions related to their learning…
SocialNetwork	SocialTutor	SocialTutor is a social networking software application that connects individuals seeking tutoring or mentorship with experienced tutors or mentors in various subjects or areas of expertise. Users can create profiles, specify the subjects or skills they need assistance with, and search for tutors or mentors who can provide guidance. The application provides a messaging feature for users to commun…
SocialNetwork	CareerConnect	CareerConnect is a social networking software application designed to connect students and professionals within a specific industry for mentorship and career guidance. Users can create profiles, search for professionals based on their industry, and request mentorship or advice. Professionals can accept or decline requests and both parties can communicate through messaging. The application also pr…
SocialNetwork	FriendMatch	FriendMatch is a social networking software application that helps individuals find and connect with like-minded individuals for friendship. Users can create profiles, specify their interests, hobbies, and preferences, and search for compatible friends based on these criteria. The app provides a matching algorithm that suggests potential friends based on shared interests and compatibility. Users …
SocialNetwork	SocialShare+	SocialShare+ is a social networking software application that allows users to share and discover content with others, while also providing a platform for collaboration and creative projects. Users can create profiles, upload images, videos, or articles, and share them with their network. They can also explore and interact with content shared by others, such as liking, commenting, or saving conten…
SocialNetwork	SocialMatchup	SocialMatchup is a social networking software application that helps individuals connect and collaborate based on their shared skills and interests. Users can create profiles, specify their skills, expertise, and interests, and search for like-minded individuals to collaborate with. The app provides a matching algorithm that suggests potential matches based on compatibility. Users can initiate co…
SocialNetwork	SocialSkills	A social networking software application designed to help individuals improve their social skills and build meaningful relationships. The app provides interactive exercises and resources to enhance communication, empathy, active listening, and other key social skills. Users can track their progress, set goals, and receive personalized feedback to help them in their social development journey. The…
Sport Game	Score Keeper	A software to keep track of scores and statistics for sports games. Users can input team names, update scores, and view real-time updates of the current scores and total time played. The software provides a user-friendly interface and does not require any complex features.
Sport Game	Scoreboard Tracker	A software application that allows users to track and update scores for various sports games in real-time.
Sport Game	Goalie Training Assistant	Provides training assistance for ice hockey goalies by simulating shots, tracking positioning and reactions, and offering real-time feedback and training drills.
Sport Game	SportsStats App	Provide comprehensive statistical insights and analysis for various sports, track and record player, team, and match statistics, generate reports and visualizations, personal training plans and achievements.
Sport Game	SportArena	Develop a user-friendly software application that allows users to create and customize virtual sports arenas.
Sport Game	Performance Tracker	A software application to track and analyze performance metrics for individual athletes in various sports. Users can input player names, update performance scores for specific metrics such as speed, agility, and accuracy, and view real-time updates of the performance progress. The software provides a user-friendly interface and generates reports and visualizations to help athletes and coaches mon…
Sport Game	Shot Accuracy Trainer	A software application that helps athletes improve their shot accuracy in various sports by providing a virtual training environment. Users can select their sport, input shot settings such as distance and target size, and then practice their shots using a virtual interface. The software tracks and analyzes shot accuracy, provides real-time feedback on technique, and generates reports to help athl…
Sport Game	Sports Workout Planner	A software application that helps athletes plan and organize their workouts for various sports. Users can input their sport of choice and specific training goals, and the software provides a personalized workout plan with recommended exercises, sets, and reps. The software also tracks and records workout progress, generates reports to monitor performance, and offers guidance and tips on proper te…
Sport Game	Sport Strategy Planner	A software application that helps coaches and team managers plan and strategize for various sports games. Users can input the specific sport they want to plan for, create and customize gameplays, and analyze different strategies. The software provides a user-friendly interface, allowing users to drag and drop players to specific positions on the field or court. Coaches can also add notes and anno…
Sport Game	Sport Event Organizer	The Sport Event Organizer software is designed to help organizers plan and manage sports events efficiently. It allows users to input event details such as date, time, location, and type of sport. The software then generates a schedule, assigns teams and referees, and provides real-time updates on game progress. Additionally, it has features to track participant registration, manage team rosters,…
Sport Game	SportMatch Predictor	SportMatch Predictor is a software application that uses historical data and statistical analysis to predict the outcome of upcoming sports matches. Users can select the sport they are interested in, input the names of the teams or players competing, and the software will analyze past performance data, team statistics, and other relevant factors to provide a probability-based prediction of the ma…
Sport Game	Sports Betting Analyzer	A software application that provides analysis and insights for sports betting enthusiasts. Users can input data about upcoming matches, such as team statistics, player performance, and historical data. The software then uses these inputs to generate predictions and probabilities for different betting outcomes. It also offers recommendations on which bets to place based on the most favorable odds …
Sport Game	Motion Analysis Trainer	The Motion Analysis Trainer is a software application that helps athletes analyze and improve their movement technique in various sports. Users can upload videos of their performances and the software will analyze the footage, tracking body movements, angles, and positioning. It provides real-time feedback on technique, highlighting areas of improvement and offering suggestions for refinement. Th…
Sport Game	SportGame Challenge	A software application that provides interactive sports challenges for users to improve their skills and compete with others. Users can select their sport of choice and choose from a variety of challenges, such as shooting accuracy, passing accuracy, or sprint speed. The software tracks and records user performance for each challenge, provides real-time feedback on technique, and generates leader…
Sport Game	SportGame Progress Tracker	SportGame Progress Tracker is a software application that allows athletes to track and monitor their progress in multiple sports games. Users can input the name of the sport and the specific game they want to track, and then log their performance data for each game. The software provides a user-friendly interface to input metrics such as scores, time played, and statistics. It also generates repo…
Sport Game	SportsPlayer Connect	A software application that allows athletes to connect with each other, find partners or teams for sports games, and schedule practice sessions or friendly matches. Users can create profiles, specify the sport they play, their skill level, and their availability. The software provides a user-friendly interface to search and connect with other athletes based on similar interests and availability. …
Sport Game	SportGame Training Planner	The SportGame Training Planner is a software application that helps athletes plan and organize their training sessions for various sports. Users can input their sport of choice, specific training goals, and available equipment. The software provides a personalized training plan with recommended exercises, sets, and reps. It also tracks and records training progress, generates reports to monitor p…
Sport Game	Sports Team Manager	A software application that helps sports team managers and coaches organize and manage their teams. It provides features such as tracking player availability, creating and managing team schedules, assigning positions and roles, and communicating with team members.
Sport Game	SportGame Performance Analysis	A software to analyze and evaluate athletes
Sport Game	Sports Trivia Game	The Sports Trivia Game is an interactive software application that allows users to test their knowledge of various sports through a trivia format. Users can select their preferred sport category, such as soccer, basketball, or tennis, and then answer multiple-choice questions related to that sport. The software keeps track of the user
Sport Game	Stat Tracker	A software application that allows users to track and record statistics for individual players in various sports. Users can input player names, track metrics such as goals, assists, and saves, and view real-time updates of the player
Sport Game	Sports Skill Trainer	A software application that provides interactive skill training sessions for athletes to improve their performance in various sports. Users can select their sport of choice and choose from a range of skill drills, such as shooting, passing, or dribbling. The software tracks and records user performance for each drill, provides real-time feedback on technique and execution, and generates reports t…
Sport Game	SportGame Performance Assessment	A software application that allows athletes and coaches to assess and evaluate their performance in various sports games. Users can input the sport they want to assess, select the specific game or match they want to evaluate, and input key performance metrics such as goals scored, assists made, or time taken. The software provides a user-friendly interface to enter and track performance data.
Sport Game	SportGame Fitness Challenge	SportGame Fitness Challenge is a software application that provides interactive fitness challenges for users to improve their overall fitness and compete with others. Users can select their preferred sport category, such as cardio, strength, or flexibility, and choose from a variety of challenges within that category. The software tracks and records user performance for each challenge, provides r…
Sport Game	SportGame Live Commentary	SportGame Live Commentary is a software application that allows users to provide real-time commentary for sports games. Users can select the sport they want to commentate on, input the team names and game details, and then provide live commentary through a text-based interface. The software generates a live feed of the commentary, allowing users to share their insights, analysis, and play-by-play…
Sport Game	SportGame Strategy Quiz	The SportGame Strategy Quiz is a software application that allows users to test their understanding and knowledge of different sports strategies through a quiz format. Users can select their preferred sport category, such as basketball, soccer, or tennis, and then answer multiple-choice questions related to strategy and tactics in that sport. The software keeps track of the user
Sport Game	SportGame Quiz	SportGame Quiz is a software application that allows users to test their knowledge of sports games through a quiz format. Users can select their preferred sport category, such as basketball, soccer, or tennis, and then answer multiple-choice questions related to the rules, history, and famous players of that sport. The software keeps track of the user
Sport Game	SportGame Match Analysis	SportGame Match Analysis is a software application that enables coaches and players to analyze and evaluate their performance in sports matches. Users can input the sport they want to analyze, select the specific match they want to evaluate, and input key performance metrics such as goals scored, assists made, or time taken. The software provides a user-friendly interface to enter and track perfo…
Sport Game	SportGame Match Simulation	The SportGame Match Simulation is a software application that allows users to simulate and play out virtual sports matches. Users can select their preferred sport, input team names, and customize various aspects of the match such as venue, weather conditions, and player attributes. The software provides a user-friendly interface with realistic gameplay mechanics and AI-controlled opponents. Users…
Sport Game	Sports Referee Simulator	A software application that allows users to simulate the role of a sports referee in various sports games. Users can select their preferred sport, input game settings such as teams, players, and rules, and then officiate the game by making decisions and issuing penalties based on the simulated gameplay. The software provides a realistic simulation environment with accurate game physics and rules.
Sports	SportsMatchFinder	A software application that allows users to find local sports matches and events in their area. Users can search for specific sports, view upcoming matches, and connect with other participants.
Sports	Sports Activity Tracker	A software application for users to track and manage their sports activities. It allows manual input or integration with wearable devices for automatic tracking. Users can monitor their progress, set goals, and view performance metrics.
Sports	Playbook Manager	The Playbook Manager is a sports software application that allows coaches to design and manage their team
Sports	Sports Highlights Analyzer	The Sports Highlights Analyzer is a software that analyzes sports highlights videos, automatically detects and tracks players, identifies key events, and generates detailed statistics and insights for different sports like football, basketball, tennis, etc.
Sports	Sports Strategy Planner	This software application allows coaches and players to plan and strategize for their upcoming sports matches. Users can create game plans by dragging and dropping players into positions, drawing plays and formations, and adding notes. The software includes a library of popular plays and formations for different sports, such as football, basketball, and soccer. Users can save and share their game…
Sports	Sports Skills Tracker	A software application that allows athletes to track and improve their sports skills. It provides a comprehensive database of various sports skills and drills, along with video tutorials and step-by-step instructions. Users can create personalized training plans, set goals, and track their progress over time.
Sports	Sports Team Roster Organizer	A software application that allows coaches and team managers to organize and manage their sports team rosters. Users can easily input and update player information, including name, position, jersey number, and contact information. The software provides a clear and intuitive interface for coaches to view and edit team rosters, create lineups, and track player availability for upcoming matches.
Sports	SportsGameTickets	SportsGameTickets is a software application that allows users to conveniently purchase tickets for sports events. The app provides a user-friendly interface where users can browse through upcoming sports games, view seating charts, and select their preferred seats. Users can also filter games by sport type, location, and date to find the events they are interested in. Once users have selected the…
Sports	Sports Fitness Tracker	The Sports Fitness Tracker is a software application focused on helping users track their fitness progress in various sports activities. Users can manually input their workout details, including duration, intensity level, and type of exercise, or integrate with wearable devices for automatic tracking. The software includes a comprehensive database of sports activities, such as running, cycling, s…
Sports	Sports Equipment Inventory Tracker	The Sports Equipment Inventory Tracker is a software application designed to help sports teams and organizations efficiently manage their equipment inventory. It allows users to input and update information about different types of equipment, such as jerseys, balls, or training gear. Users can easily track the quantity and condition of each item, view the availability and location of equipment, a…
Sports	Sports Team Communication	This software application is designed to improve communication and coordination among sports teams. It allows coaches, players, and team managers to easily share messages, updates, and important information in a centralized platform. Users can create team groups, send individual or group messages, and organize team events and practices. The software also includes features such as document sharing…
Sports	Sports Injury Prevention Tracker	The Sports Injury Prevention Tracker is a software application that allows athletes to track and prevent sports injuries. It provides a comprehensive database of warm-up exercises and stretches for different sports. Users can create personalized warm-up routines based on their sport and specific needs. The software includes video tutorials and step-by-step instructions for each exercise, ensuring…
Sports	Sports Performance Analyzer	This software application analyzes sports performance videos and provides detailed insights and statistics to help athletes and coaches improve their game. Users can upload videos of their practices or matches, and the software automatically detects and tracks players, measures their performance metrics such as speed, accuracy, and agility, and generates performance reports. It also provides vide…
Sports	SportsShotTracker	SportsShotTracker is a software application that allows athletes to track and analyze their shooting performance in various sports. Users can input their shooting data, including shot type, distance, and outcome (made or missed), after each practice or game. The software provides detailed statistics and insights, including shooting accuracy, shot distribution, shooting hotspots, and progress over…
Sports	Sports Event Finder	A software application that allows users to discover and attend local sports events and tournaments in their area. Users can search for specific sports or categories, view details about the events, check dates, times, and locations, and register their attendance.
Sports	Sports Performance Comparison	A software application that allows athletes to compare their performance metrics with professional athletes in their respective sports. Users can input their own performance data, including speed, accuracy, agility, and endurance, and the software will provide a comparison to professional athletes in the same sport. Athletes can identify areas where they excel or need improvement compared to prof…
Sports	Sports Event Scheduler	A software application that allows sports teams and organizations to easily schedule and manage their events. Users can create and modify event details such as date, time, location, and type of event (practice, game, tournament). The software provides a calendar view where users can visualize their scheduled events and easily make adjustments as needed. Users can also send automated notifications…
Sports	Sports Performance Planner	The Sports Performance Planner is a software application that allows athletes to plan and track their performance goals. Users can set specific performance goals for their sport, such as increasing running speed, improving shooting accuracy, or enhancing agility. The application provides personalized training plans, which include workout routines, drills, and exercises tailored to the user
Sports	Sports Team Performance Tracker	A software application that allows sports teams to track and analyze their performance metrics. It enables teams to input data such as goals scored, assists, shots on target, possession percentage, and other relevant statistics. The software generates performance reports, highlights key areas for improvement, and provides insights for coaches and players to enhance their strategies and training. …
Sports	Sports Performance Journal	The Sports Performance Journal is a software application that allows athletes to track and analyze their performance in various sports activities. Athletes can log their workouts, practice sessions, and games, and input specific details such as duration, intensity level, performance metrics, and notes. The software provides a comprehensive dashboard where athletes can view their performance over …
Sports	Sports Competition Analysis	Sports Competition Analysis is a software application that analyzes sports competitions by automatically detecting and tracking players, measuring performance metrics such as speed, accuracy, and agility, and generating detailed reports and insights. It provides video playback and slow-motion features for in-depth analysis and feedback.
Sports	Sports Performance Assessment	The Sports Performance Assessment software is designed to assess athletes
Sports	SportsPlayerScout	A software application that allows scouts and coaches to analyze and track the performance of individual athletes in various sports. Users can input performance data such as speed, agility, accuracy, and endurance for each athlete. The software generates detailed reports and provides insights on the strengths and weaknesses of the athletes. It also allows users to compare the performance of multi…
Sports	SportsMatchScheduler	A software application that allows sports team managers to schedule and manage their team
Sports	Sports Match Prediction	A software application that uses machine learning algorithms to predict the outcome of sports matches based on historical data and team/player performance.
Sports	Sports Match Video Analysis	A software application that allows coaches and players to analyze recorded sports match videos for performance evaluation and improvement. Users can upload game footage, and the software automatically detects and tracks players, measures their performance metrics such as speed, accuracy, and agility, and generates detailed reports and insights. It also provides video playback and slow-motion feat…
Sports	Sports Performance Tracking	A software application that allows athletes to track and analyze their performance in various sports activities. It provides a comprehensive dashboard where athletes can view their performance over time, set goals, and track their progress.
Sports	Sports Practice Planner	A software application that allows coaches to plan and schedule practice sessions for their sports teams. The software includes features such as creating a practice schedule, assigning drills and exercises to each session, and tracking the progress and attendance of the players.
Sports	SportsEquipmentMaintenance	An application that helps sports teams and organizations efficiently manage the maintenance of their sports equipment. Users can input and update information about different types of equipment, such as jerseys, balls, or training gear. The software provides a user-friendly interface to track equipment maintenance tasks, including cleaning, repair, and replacement. Users can set reminders for rout…
Sports	SportsTeamStats	SportsTeamStats is a software application that allows sports teams to track and analyze their performance statistics. Users can input data such as goals scored, assists, shots on target, possession percentage, and more for each game. The software generates performance reports, highlights areas for improvement, and provides insights for coaches and players. Teams can compare their performance agai…
Strategy Game	Battle Plan	Battle Plan is a strategy game software application that allows players to create and execute battle plans. It provides various scenarios and challenges for players to test their strategic skills, both in single-player and multiplayer modes.
Strategy Game	Battlefield Commander	A strategy game where players lead an army to victory by engaging in tactical combat, making strategic decisions, and managing resources in different battle scenarios and terrain types.
Strategy Game	Ancient Empires	A turn-based strategy game where players build and expand ancient empires, strategically managing resources, technologies, and engaging in diplomacy, trade, and warfare.
Strategy Game	War Command	War Command is a strategy game software that allows players to build and lead their own virtual army to conquer territories and defeat opponents. The game offers various strategies, such as resource management, troop deployment, and tactical decision-making. Players can customize their armies, form alliances with other players, and engage in intense battles. The goal is to expand their empire and…
Strategy Game	Strategic Alliance	A turn-based strategy game where players build and manage their own alliance, working together to conquer territories and defeat other rival alliances.
Strategy Game	Kingdom Builder	Build and expand your own kingdom, allocate resources, construct buildings, train armies, and engage in battles with other kingdoms or AI opponents in this strategic virtual world.
Strategy Game	Warlords	Warlords is a turn-based strategy game where players take on the role of powerful rulers vying for dominance over a fictional land. Each player must strategically manage their resources, build and upgrade their armies, and conquer territories to expand their empire. The game features various unit types, terrain types, and a dynamic economy that requires careful planning and decision-making. Warlo…
Strategy Game	Civilization Conquest	Guide your civilization from ancient times to the modern era in this turn-based strategy game. Make strategic decisions, manage resources, build cities, form alliances, and wage wars.
Strategy Game	Future Empires	Future Empires is a turn-based strategy game where players build and expand their own futuristic empires. Manage resources, research technologies, and engage in diplomacy, trade, and warfare to achieve dominance in a sci-fi world.
Strategy Game	Battle Tactics	Battle Tactics is a strategy game software application that puts players in command of their own armies and challenges them to devise and execute innovative battle tactics. Players must carefully analyze the battlefield, make strategic decisions, and deploy their troops effectively to outmaneuver and defeat their opponents. The game provides a range of scenarios and challenges to test players
Strategy Game	Battle Tactics: Advanced Warfare	Battle Tactics: Advanced Warfare is a strategy game software application that focuses on innovative battle tactics. It allows players to strategically analyze the battlefield, make thoughtful decisions, and deploy their troops effectively to outmaneuver and defeat their opponents. The game offers a range of scenarios and challenges to test players
Strategy Game	Battle Masters	Battle Masters is a strategy game software application that allows players to assemble a team of powerful warriors and compete in tactical battles. Players can strategically position their units, plan their moves, and use special abilities to defeat their opponents. The game offers a variety of battle scenarios and challenges to test players
Strategy Game	Battle Kingdoms	Battle Kingdoms is a strategy game software application where players build and defend their own kingdoms in a medieval fantasy world. They must strategically manage resources, construct buildings, train armies, and engage in battles with other kingdoms or AI opponents. The game offers a variety of unit types, terrain types, and strategic challenges to test players
Strategy Game	Strategy Planner	The Strategy Planner is a software application that allows players to create and manage their own strategies for various situations and challenges. Players can customize their plans by selecting different tactics, formations, and positioning of units. The software provides a virtual battlefield where players can simulate their strategies and see the outcomes in real time. It also offers a variety…
Strategy Game	Kingdom Conquest	Kingdom Conquest is a strategy game software application that combines elements of city-building, resource management, and tactical warfare. Players must strategically build and expand their own kingdoms, allocate resources for construction and training armies, and engage in battles with other players or AI opponents. The game offers a variety of unit types, technologies to research, and diplomat…
Strategy Game	Kingdom Strategist	Kingdom Strategist is a strategy game software application that allows players to strategically plan and manage their own medieval kingdoms. Players must allocate resources, construct buildings, train armies, and engage in battles with other kingdoms or AI opponents. The game offers a variety of terrain types, unit types, and strategic challenges to test players
Strategy Game	Strategic Armada	Strategic Armada is a strategy game software application that allows players to command their own fleet of spaceships and engage in intergalactic warfare. Players must strategically allocate resources, upgrade their ships, and plan tactical maneuvers to outsmart and defeat their opponents. The game offers a variety of space environments, spaceship types, and strategic challenges to test players
Strategy Game	Empire Builder	Empire Builder is a strategy game software application where players take on the role of an emperor and must strategically build and expand their own empire. Players will need to allocate resources, construct buildings, train armies, and engage in battles with other empires or AI opponents. The game offers a variety of terrain types, unit types, and strategic challenges to test players
Strategy Game	Tactical Warfare	Tactical Warfare is a strategy game software application that focuses on tactical combat and decision-making. Players will command their own armies and engage in battles with opponents to achieve victory. They must strategically position their units, plan their moves, and use special abilities to outmaneuver and defeat their enemies. The game offers a variety of battle scenarios and challenges to…
Strategy Game	War Strategy+	War Strategy+ is a strategy game software application that combines traditional warfare and resource management. Players must strategically plan and execute military operations to conquer territories and defeat opponents. They need to allocate resources, train armies, and develop advanced tactics to outsmart their enemies.
Strategy Game	Conquest Chronicles	Conquest Chronicles is a strategy game software application that allows players to lead their ancient civilization to conquer new lands and build a powerful empire. Players must strategically manage resources, train armies, form alliances, and engage in battles with AI opponents or other players. The game offers various terrains, technologies, and strategic challenges to test players
Strategy Game	Strategic Planning Simulator	The Strategic Planning Simulator is a strategy game software application that immerses players in the world of strategic decision-making...
Strategy Game	War Front	War Front is a strategy game application where players strategically plan and execute military operations to achieve victory in a war. They allocate resources, train armies, and develop advanced tactics to outsmart enemies.
Strategy Game	Kingdom Chronicles	Kingdom Chronicles is a strategy game software application that combines elements of city-building, resource management, and tactical warfare. Players must strategically build and expand their own kingdoms, allocate resources for construction and training armies, and engage in battles with other players or AI opponents. The game offers a variety of unit types, technologies to research, and diplom…
Strategy Game	Strategic Conquest	Strategic Conquest is a strategy game software application that allows players to command their own armies and strategically conquer territories to expand their empire. Players must engage in tactical combat, make strategic decisions, and manage resources effectively. The game provides a variety of terrain types, unit types, and strategic challenges to test players
Strategy Game	Strategic Domination	Strategic Domination is a strategy game software application where players strategically plan and execute military operations to conquer territories and achieve dominance. They must strategically allocate resources, train armies, and develop advanced tactics to outsmart their opponents. The game offers various terrains, unit types, and strategic challenges to test players.
Strategy Game	Strategic Conquest: World Domination	In this turn-based strategy game, players strategically plan and execute military operations to conquer territories and achieve global dominance. They must carefully manage resources, train armies, and develop advanced tactics to outwit opponents in a dynamic world map. The game offers various terrains, unit types, and strategic challenges to test players
Strategy Game	Battle Strategy	Battle Strategy is a strategy game software application that focuses on planning and executing battle strategies. Players must strategically analyze the battlefield, make tactical decisions, and deploy their troops effectively to outmaneuver and defeat their opponents. The game offers a variety of scenarios and challenges to test players
Strategy Game	Strategic Conqueror	Strategic Conqueror is a strategy game software application that allows players to strategically plan and execute military operations to conquer territories and expand their empire. Players must allocate resources, train armies, and make strategic decisions to outmaneuver and defeat opponents. The game offers a variety of terrain types, unit types, and strategic challenges to test players.
Strategy Game	Realm Conquest	Realm Conquest is a strategy game software application where players strategically plan and execute military operations to conquer fantasy realms and establish their dominion. Players must manage resources, train armies, and develop advanced tactics to overcome opponents. The game offers a variety of terrains, unit types, and strategic challenges to test players.
Tools&Utilities	Time Tracker	Time Tracker is a software application that helps users effectively track and manage their time. It provides features such as task creation, timers, and alarms to enhance productivity. With detailed reports, users gain insights into their time allocation, enabling them to identify areas for improvement. Time Tracker simplifies time management and aids in optimizing productivity.
Tools&Utilities	Console File Renamer	A command-line software that enables users to rename multiple files in bulk by specifying a renaming pattern and applying it to a selected group of files in a directory. The software provides various renaming options like adding prefixes or suffixes, replacing text, or changing the file extension. Its simple and intuitive interface makes file organization and management easier.
Tools&Utilities	Calculator+	Design and develop a user-friendly software that performs basic and advanced mathematical calculations, including scientific calculations, unit conversions, and percentage calculations. The software should have a simple interface with a history log to track previous calculations.
Tools&Utilities	Web Page Monitor	This software allows users to monitor and track changes on web pages of their interest...
Tools&Utilities	Code Snipper	CodeSnipper is a Tools&Utilities software application that allows developers to store, organize, and retrieve snippets of code for future reference. It provides a user-friendly interface for categorizing code snippets based on programming languages and frameworks. Users can add metadata such as tags and descriptions to facilitate searchability. The application also offers features like syntax hig…
Tools&Utilities	Directory Organizer	An intuitive software application that assists users in organizing files and folders within a selected directory. It presents a user-friendly interface to choose a directory and automatically sorts the files by file type or personalized rules. Users can define rules to determine how files should be organized by creating folders or subfolders. The Directory Organizer simplifies file management and…
Tools&Utilities	QuickZip	Efficient File Compression and Extraction Tool
Tools&Utilities	Calculation Assistant	An intuitive software application that assists users in performing various calculations quickly and accurately. It supports basic arithmetic operations as well as more advanced functions like square root, exponentiation, and percentage calculation.
Tools&Utilities	Countdown Timer	A software application that allows users to set a specific amount of time and countdown to zero.
Tools&Utilities	Screenshot Capture	A simple and efficient software that allows users to capture screenshots of their computer screen.
Tools&Utilities	Duplicate File Finder	Duplicate File Finder is a software application that helps users identify and remove duplicate files from their computer systems. It scans a selected directory or storage device, analyzes file contents, and compares them to find duplicates based on file name, size, and content. It presents users with a detailed report that lists the duplicates found, allowing them to choose which files to keep an…
Tools&Utilities	Folder Size Analyzer	Folder Size Analyzer is a Tools&Utilities software application that analyzes the size of folders within a selected directory. It scans the directory and calculates the total size of each folder, providing users with a comprehensive report. Users can easily identify large folders or directories that are taking up excessive storage space, enabling them to optimize their file organization and free u…
Tools&Utilities	Text Case Converter	A software application that allows users to convert text to different case formats, such as uppercase, lowercase, title case, sentence case, and camel case. It provides a user-friendly interface where users can input their text and select the desired case format. The converted text is displayed and can be easily copied to the clipboard. This software simplifies the process of converting text case…
Tools&Utilities	Random Password Generator	A software application that generates random passwords based on user-specified parameters such as length and character types. The user can specify the inclusion/exclusion of characters like uppercase letters, lowercase letters, numbers, and symbols. It should also provide an option to exclude ambiguous characters for improved password readability.
Tools&Utilities	Directory Size Analyzer	A software application that analyzes the size of directories within a selected folder or drive. It provides a comprehensive report of the total size of each directory, enabling users to optimize their file organization and free up storage space.
Tools&Utilities	File Size Analyzer	File Size Analyzer is a Tools&Utilities software that analyzes the size of individual files within a selected directory or drive. It scans the directory and calculates the size of each file, providing users with a detailed report. Users can easily identify large files that are taking up excessive storage space, enabling them to optimize their file organization and free up storage. File Size Analy…
Tools&Utilities	Batch Image Resizer	The Batch Image Resizer is a software application that allows users to resize multiple images in bulk. Users can select a group of images from a specified directory and provide the desired dimensions for resizing. The software should support common image formats like JPEG, PNG, and GIF. It should also provide options for maintaining aspect ratio, applying a specific resize algorithm, and choosing…
Tools&Utilities	Notepad Plus	Notepad Plus is a software application that provides an enhanced text editing experience. It includes features such as syntax highlighting, code indentation, search and replace functionality, and customizable themes. Notepad Plus allows users to create and edit text files with ease, making it a versatile tool for programmers, writers, and anyone who needs a powerful yet simple text editor.
Tools&Utilities	Text Snippet Organizer	Text Snippet Organizer is a software application that allows users to store, organize, and retrieve snippets of text. It provides a user-friendly interface for categorizing snippets based on tags and allows the addition of descriptions for improved searchability and organization. The application offers features like text formatting and syntax highlighting to increase readability. With the Text Sn…
Tools&Utilities	Thumbnail Maker	The Thumbnail Maker is a software application that allows users to easily create visually appealing thumbnail images for videos or other online content. It provides a user-friendly interface where users can select an image or video frame, customize the thumbnail dimensions, add text or captions, and apply filters or effects. The software also offers options for exporting the created thumbnails in…
Tools&Utilities	System Backup Manager	The System Backup Manager is a software application that provides users with a simple and efficient way to backup and restore their computer systems. It allows users to create full system backups or select specific files and folders for backup. The software provides options to schedule regular automated backups and offers features like incremental backups and compression to save storage space. Us…
Tools&Utilities	Unit Converter	Unit Converter is a software application that enables users to easily convert between different units of measurement. It provides a comprehensive range of conversion options, including length, weight, volume, temperature, time, and more. Users can input a value in one unit and select the desired unit for conversion. The software should support both metric and imperial units and display the conver…
Tools&Utilities	Secret Note Keeper	Secret Note Keeper is a software application that allows users to securely store and manage their private notes. It provides encryption features to ensure the confidentiality of the notes, and users can create multiple notebooks to categorize their notes based on topics or themes. The software allows users to add, edit, and delete notes within each notebook, and supports features like search and …
Tools&Utilities	Time Converter	A time conversion software that enables users to convert time between different time zones and formats.
[truncated: 96 more rows]
